# Supplementary material for: Aroma-Enhancing Strategies in Mead: A Metabolomics- and Machine Learning-Guided Additive Approach
Source: Research Square preprint supplement (doi:10.21203/rs.3.rs-7189594/v1), 2025-07-29
Supplement: Supplementary file 1 [file 1143cd8f41d2c3bfe8341d19.xlsx]

## Sheet: Table S5.excel
			Table S6. 17 potential additives
			No.	Code	Compound	CAS	Grade	Price(yuan/g(ml))
			1	ES30	Ethyl phenylacetate	101-97-3	99%, FG	0.206
			2	ES7	Butyl acetate	123-86-4	SafeDry	1.254
			3	OT8	p-Cymene	99-87-6	RG	0.456
			4	ES13	Ethyl 3-methylvalerate	5870-68-8	RG	1.671
			5	ES23	Ethyl benzoate	93-89-0	RG	0.0764
			6	AD16	Undecanal	112-44-7	RG	0.63
			7	AK1	Octane	111-65-9	RG	0.118
			8	AD10	Decanal	112-31-2	99%, FG	0.376
			9	AE2	Styrene	100-42-5	RM	466.2
			10	AD7	1-Nonanal	124-19-6	RG	0.836
			11	ES35	Ethyl nonanoate	123-29-5	99%, FG	0.248
			12	AK5	Undecane	1120-21-4	RG	0.18
			13	OT5	p-Xylene	106-42-3	RM	1190
			14	AE6	Limonene	5989-27-5	RG	0.72
			15	OT4	Chlorobenzene	108-90-7	SafeDry	0.78
			16	ES39	Ethyl 3-phenylpropionate	2021-28-5	RG	0.402
			17	AD6	Phenylacetaldehyde	122-78-1	50%,FG	0.154
