# Supplementary material for: Aroma-Enhancing Strategies in Mead: A Metabolomics- and Machine Learning-Guided Additive Approach
Source: Research Square preprint supplement (doi:10.21203/rs.3.rs-7189594/v1), 2025-07-29
Supplement: Supplementary file 2 [file 2e6650e42888bbab040b43f6.xlsx]

## Sheet: Table S2.excel
	Table S2. Volatile compounds in 15 semi-sweet meads
						Reverse Similarity Index (DB-WAX122-7062)		Retention Index (HP-5ms Ultra Inert)		Retention Index (SH-I-5Sil)		Concentration（μg/L)
	Class	Code	RT (min)	Compound	CAS	Sample	Standard	Sample	Standard (Reference)	Sample	Standard (Reference)	Hs-SDM	CmR-SDM	HvL-SDM	NF-SDM	FM-SDM	Sg-SDM	PeS-SDM	RCG-SDM	Ct-SDM	Js-SDM	RrT-SDM	Obt-SDM	Coffee-SDM	Ah-SDM	Rh-SDM	available
	Alcohol	AL1	2.011	Ethanol	64-17-5	953	943		427		463	5305.37±183.78	5636.18±537.66	4812.29±220.53	5146.11±286.52	6413.69±390.13	4488.81±475.05	3740.30±431.35	6896.48±383.93	6115.76±522.53	4336.41±150.21	5871.45±310.69	5193.15±589.83	6605.87±433.18	5520.05±438.14	5335.92±373.51	1
		AL3	4.631	2-Hydrazinoethanol				709				-	-	-	-	18.10±1.44	-	-	-	-	-	29.20±1.52	-	-	-	-
		AL4	5.414	Isoamyl alcohol	123-51-3	897	866	732	736	711	697	3184.40±318.44	3302.70±206.25	3197.18±293.03	3150.95±303.87	4146.36±580.49	2818.87±171.46	2371.35±205.37	4145.00±548.33	3506.86±229.96	2839.40±177.32	3929.75±437.59	3625.39±158.03	4025.41±80.51	3676.20±127.35	2681.10±70.94	1
		AL6	7.402	2,3-Butanediol	513-85-9			789	788	763	743	58.94±4.82	49.49±1.71	44.88±3.99	75.63±4.72	45.75±2.99	37.72±3.09	34.51±1.50	87.80±8.91	174.97±17.23	71.22±5.69	174.14±15.08	52.47±4.48	180.62±14.45	205.20±8.21	315.90±25.07
		AL7	7.91	1-Propoxy-2-propanol	1569-01-3			803	801			-	0.37±0.03	-	-	-	-	-	-	-	-	-	-	-	-	-
		AL8	9.903	5-Methyl-2-heptanol	54630-50-1			850	856			23.46±1.47	8.39±0.15	7.48±0.66	15.15±1.59	9.34±0.41	9.13±0.66	6.04±0.74	7.28±0.50	7.43±0.67	8.82±0.47	10.54±0.28	6.88±0.66	11.70±1.07	8.38±0.84	-	1
		AL10	10.692	3-Heptanol				869	877			-	-	-	-	-	-	-	1.05±0.09	-	-	1.47±0.15	-	-	1.10±0.13	-
		AL14	12.383	3-Methyl-2-hexanol	2313-65-7	793	785	911	909			-	-	-	-	0.16±0.02	-	-	0.38±0.05	1.91±0.07	-	-	-	-	-	0.46±0.01	1
		AL16	14.916	3-Heptanol, 3-methyl-				978	975			-	-	-	-	-	-	14.94±0.68	-	-	-	-	-	-	-	-
		AL17	16.731	Eucalyptol	470-82-6	927	938	1032	1026			-	256.98±24.51	-	-	-	-	-	-	-	-	-	-	-	-	-	1
		AL19	18.282	cis-5-Ethenyltetrahydro-α,α,5-trimethyl-2-furanmethanol	5989-33-3	890	931	1068	1074			3.17±0.28	1.41±0.12	-	1.42±0.09	-	-	1.66±0.26	9.45±0.57	-	3.23±0.24	2.42±0.22	4.77±0.44	-	-	5.69±0.19	1
		AL20	18.46	1-Heptanol, 6-methyl-				1072				6.02±0.55	-	-	-	-	-	-	6.47±0.45	-	-	-	-	-	-	-
		AL21	18.482	1-Octanol	111-87-5	901	891	1074	1071			-	15.50±1.38	-	-	10.52±1.37	9.34±1.14	5.61±0.39	-	4.94±0.47	-	9.50±0.72	-	-	8.56±0.68	-	1
		AL22	18.946	trans-Linalool oxide (furanoid)				1085	1086			-	-	-	-	-	-	-	-	-	1.02±0.06	-	-	-	-	-
		AL23	19.481	Linalool	78-70-6	912	879	1100	1099			-	-	-	-	-	-	11.11±0.73	-	-	87.10±8.31	-	8.71±0.57	-	-	-	1
		AL25	19.713	E-3-Pentadecen-2-ol				1105				-	-	-	-	-	-	-	11.41±1.27	-	-	-	-	-	-	-
		AL26	20.27	Phenylethyl alcohol	60-12--8	926	927	1118	1116	1108	1136	3270.51±267.70	2647.90±370.71	3940.72±479.41	3849.23±328.88	4463.55±309.24	3520.63±549.94	2989.92±274.03	5380.27±327.27	4210.00±693.05	4120.61±321.83	5114.62±405.96	3988.50±404.79	4332.68±385.09	4317.38±228.45	7129.41±257.05	1
		AL31	22.19	cis-Chrysanthenol				1161	1162			-	238.64±15.65	-	-	-	-	-	-	-	-	-	-	-	-	-
		AL33	22.814	Terpinen-4-ol	562-74-3			1176	1177			-	28.60±1.59	-	-	-	-	-	-	-	-	-	-	-	-	-
		AL42	25.386	Citronellol	106-22-9	855	863	1234	1228			-	-	-	-	-	-	-	-	-	-	69.63±2.51	28.06±0.49	-	-	-	1
		AL47	35.628	1-Dodecanol	112-53-8	845	856	1478	1473	1429	1457	22.69±0.68	-	-	13.04±0.35	15.19±1.35	17.55±0.93	-	22.10±0.76	14.44±0.87	26.13±1.14	-	28.40±2.79	35.63±1.98	25.58±2.22	22.05±0.66	1
		AL48	35.671	4-Dodecanol				1479	1482			-	-	-	-	-	-	6.40±0.61	-	-	-	-	-	-	-	-
		AL49	36.967	Butylated Hydroxytoluene	128-37-0	921	897	1513	1513			-	-	-	-	-	-	1.86±0.09	-	-	-	-	-	-	-	17.54±0.80	1
		AL50	39.047	1,6,10-Dodecatrien-3-ol, 3,7,11-trimethyl-				1569	1564			-	-	-	-	-	-	-	-	-	-	-	-	4.84±0.44	-	-
		AL51	41.062	γ-Eudesmol	1209-71-8			1638	1631			-	-	-	-	-	-	-	9.28±0.33	-	-	-	-	-	-	-	1
	Ester	ES1	3.043	Ethyl acetate	141-78-6	928	912	600	612	605	586	472.52±49.11	331.72±11.49	314.95±41.18	353.81±33.75	378.65±7.57	245.39±14.93	265.31±27.57	437.36±48.70	400.49±41.81	291.95±17.76	328.69±29.21	385.65±25.29	321.34±28.01	316.17±36.46	309.10±29.49	1
		ES2	3.637	Formic acid, 2-methylpropyl ester				647	642			-	-	-	-	-	-	-	-	0.98±0.08	-	-	-	-	-	-
		ES5	7.937	Propanoic acid, 2-hydroxy-, ethyl ester				803	815			-	-	3.63±0.07	-	-	-	-	-	-	3.64±0.36	-	-	-	18.00±1.54	-
		ES6	7.969	Ethyl butyrate	105-54-4	898	923	804	802	804	785	7.88±0.97	-	-	-	8.14±0.22	-	1.04±0.06	14.98±1.19	-	-	-	-	-	-	-	1
		ES10	11.178	Isoamyl acetate	123-92-2	874	904	881	876	849	820	87.74±14.44	102.93±5.73	36.62±5.39	55.18±5.52	89.50±9.47	39.42±4.92	35.68±1.89	231.76±18.39	218.57±30.36	50.90±7.49	77.60±12.09	83.42±7.13	98.70±6.91	128.16±9.68	10.36±0.73	1
		ES11	11.551	1-Butanol, 2-methyl-, acetate				890	880			0.49±0.06	-	-	-	1.09±0.09	-	-	-	-	-	-	-	-	-	-
		ES12	11.594	Butanoic acid, 3-hydroxy-, methyl ester				891	859			-	-	-	2.19±0.09	-	-	-	-	-	-	-	-	-	-	-
		ES14	14.911	Pentanoic acid, 4-methyl-, ethyl ester				978	969			-	-	-	-	-	-	13.62±0.89	9.63±0.75	-	9.81±1.16	20.72±1.49	-	15.42±1.16	11.19±1.21	-
		ES18	16.17	Ethyl caproate	123-66-0	892	878	1011	1000	997	984	-	9.60±1.17	-	7.45±1.23	18.50±1.03	11.35±1.42	3.69±0.38	-	14.84±0.97	-	6.28±0.23	-	-	5.59±0.44	-	1
		ES21	18.104	Ethyl 5-methylhexanoate	10236-10-9	833	814	1063	1072			-	-	2.66±0.05	-	-	-	-	-	-	-	-	-	2.80±0.27	-	-	1
		ES26	23.776	Ethyl caprylate	106-32-1	902	898	1197	1196	1173	1183	2288.30±79.27	580.21±61.13	1227.30±85.03	703.82±24.38	2098.58±345.47	970.24±67.92	368.40±13.28	1678.53±181.56	1110.82±117.56	782.01±68.17	934.14±85.62	685.39±47.98	881.94±70.00	825.26±24.76	99.00±4.96	1
		ES32	26.515	Phenethyl acetate	103-45-7	892	886	1260	1258	1218	1259	184.69±16.42	293.98±12.81	215.30±14.91	196.00±15.31	252.90±39.50	223.65±8.95	128.41±8.42	696.76±63.86	242.63±10.58	245.93±38.42	278.16±45.79	294.43±19.31	283.15±29.83	351.35±31.23	271.51±23.19	1
		ES34	27.519	(-)-Borneol acetate	5655-61-8			1283	1284			-	149.18±18.15	-	-	-	-	-	-	-	-	-	-	-	-	-
		ES35	28.146	Ethyl nonanoate	123-29-5	772	756	1297	1296	1309	1282	-	-	17.00±1.78	5.85±0.49	20.35±1.62	20.75±2.24	-	12.87±0.84	12.34±0.44	5.19±0.55	5.02±0.42	4.82±0.24	-	-	-	1
		ES36	28.551	Limonen-6-ol, pivalate				1307				-	3.09±0.22	-	-	-	-	-	-	-	-	-	-	-	-	-
		ES37	30.015	4,6-Heptadienoic acid, 3,3,6-trimethyl-, ethyl ester				1342				-	31.85±2.29	-	-	-	-	-	-	-	-	-	-	-	-	-
		ES39	30.42	Ethyl 3-phenylpropionate	2021-28-5	916	912	1351	1353	1373	1359	12.45±0.78	42.98±3.94	21.32±3.51	32.52±2.54	48.09±2.93	18.52±1.61	10.89±0.39	4.14±0.33	17.21±0.46	17.82±0.94	28.56±3.02	27.68±2.64	27.14±1.65	28.26±4.16	9.07±1.34	1
		ES46	31.997	Ethyl 9-decenoate	67233-91-4	848	835	1389	1387	1359	1371	132.68±17.35	-	342.58±33.04	-	247.34±8.92	164.43±13.46	55.19±2.41	249.74±17.48	290.99±17.70	175.97±16.13	-	175.62±6.33	133.05±15.34	265.49±18.58	-	1
		ES47	32.37	Ethyl caprate	110-38-3	754	782	1398	1396	1353	1381	716.73±58.67	114.43±12.89	2315.20±250.43	627.45±54.69	1416.85±112.46	1709.48±129.06	357.35±52.88	672.67±59.79	634.37±104.43	707.34±80.34	715.97±37.20	522.94±36.61	616.17±57.77	727.22±82.59	-	1
		ES48	34.348	3-Methylbutyl octanoate	2035-99-6	936	917	1447	1446			19.24±2.34	-	-	-	0.50±0.03	-	-	-	-	-	12.12±0.64	-	-	-	-	1
		ES49	34.353	2-Methylbutyl octanoate				1445	1449			-	-	17.32±2.42	-	-	-	-	-	-	-	-	-	-	-	-
		ES52	38.296	n-Capric acid isobutyl ester	30673-38-2	814	874	1549	1546			-	-	2.17±0.15	-	-	-	-	-	1.93±0.21	-	2.82±0.16	-	-	-	-	1
		ES55	40.057	Ethyl laurate	106-33-2	821	839	1597	1595	1593	1580	127.04±8.89	28.25±2.24	435.42±32.87	196.10±12.86	320.44±29.37	206.61±25.14	133.34±12.22	100.30±9.19	472.10±26.29	102.69±9.13	298.19±15.49	83.45±4.42	139.18±8.69	132.40±7.94	-	1
		ES57	41.354	Hexanoic acid, 2-phenylethyl ester				1651	1650			-	10.47±0.91	-	17.61±1.37	-	-	-	26.71±2.45	-	6.78±0.31	-	6.82±0.24	9.48±0.57	-	-
		ES58	41.359	Isoamyl decanoate	2306-91-4			1650	1646			7.03±0.04	-	18.05±2.53	-	15.25±0.91	14.17±1.35	17.69±1.16	-	18.59±21.4	-	42.32±2.12	-	-	-	-
		ES59	44.163	Ethyl myristate	124-06-1	850	873	1798	1794	1749	1779	5.63±0.58	-	9.42±0.75	6.42±0.64	10.27±1.17	8.40±0.67	2.07±0.14	-	8.81±0.55	6.36±0.55	4.92±0.34	-	7.81±0.08	8.42±0.69	-	1
		ES60	44.935	Octanoic acid, 2-phenylethyl ester				1855	1851			-	-	-	-	-	-	2.95±0.21	-	-	-	3.48±0.10	-	-	-	-
		ES61	45.205	Diisobutyl phthalate	84-69-5			1874	1870			5.69±0.51	8.97±0.54	-	-	-	-	2.99±0.08	-	-	7.30±0.07	-	7.43±0.63	7.93±0.86	8.690.46	12.36±1.01	1
		ES63	46.686	Palmitic acid ethyl ester	628-97-7	752	740		1993			0.24±0.02	-	7.23±1.13	7.95±0.94	16.92±2.64	8.24±0.67	-	-	5.47±0.81	6.46±0.59	-	-	15.92±0.46	4.44±0.35	-	1
		ES64	46.735	Nonadecanoic acid, ethyl ester					2278			-	-	-	7.43±0.27	-	-	-	-	-	-	-	-	-	-	-
	Alkene	AE2	11.653	Styrene				892	893			-	-	-	-	-	-	2.77±0.31	-	-	-	-	-	-	-	-
		AE11	31.414	Benzene, 4-ethenyl-1,2-dimethoxy-				1375	1369			-	-	-	-	-	-	-	-	-	-	-	-	33.43±1.46	-	-
		AE12	35.401	β-Chamigrene	18431-82-8	926	898	1473	1476			-	26.01±1.82	-	-	-	-	-	-	-	-	-	-	-	-	-	1
		AE14	35.833	γ-Selinene	515-17-3			1484	1479			-	2.62±0.41	-	-	-	-	-	-	-	-	-	-	-	-	-
		AE16	36.195	α-Selinene	473-13-2	837	823	1493	1494			-	5.74±0.49	-	-	-	-	-	-	-	-	-	-	-	-	-	1
		AE18	38.113	α-Calacorene	21391-99-1			1544	1542			-	-	-	-	-	-	-	4.84±0.17	-	-	-	-	-	-	-
	Aldehyde	AD3	10.384	Isobutanal diethyl acetal	1741-41-9			862	859			-	-	-	-	-	-	-	0.83±0.03	-	-	-	-	-	-	-
		AD5	14.673	Benzaldehyde	100-52-7			972	962	923	982	-	-	-	-	-	-	-	-	-	0.39±0.03	-	-	-	-	-
		AD7	19.697	1-Nonanal				1105	1104			-	-	13.58±0.47	14.31±0.89	-	6.45±0.68	-	-	-	-	12.77±1.55	-	-	8.38±0.85	12.81±0.92
		AD14	27.233	Benzenebutanal	18328-11-5			1277				2.00±0.17	-	-	-	-	-	-	-	-	-	-	-	-	2.29±0.30	1.25±0.09
	Ketone	KE1	4.582	Acetoin				708	713			64.20±8.99	-	-	-	-	-	36.65±2.99	-	-	54.38±4.65	-	-	-	-	24.69±0.65
		KE2	15.402	5-Hepten-2-one, 6-methyl-				991	986			-	-	-	-	-	-	-	-	-	2.47±0.28	-	-	-	-	-
		KE3	17.871	1-Hydroxy-6-(3-isopropenyl-cycloprop-1-enyl)-6-methyl-heptan-2-one				1057				-	1.69±0.11	-	-	-	-	-	-	-	-	-	-	-	-	-
		KE8	28.778	trans-β-Ionone	79-77-6			1312	1314			-	-	-	-	-	-	-	-	-	-	-	11.25±0.39	-	-	-
		KE19	36.956	Shyobunon	21698-44-2			1512	1503			-	-	-	-	-	-	-	-	-	0.63±0.09	-	-	-	0.55±0.02	-
		KE21	40.398	β-Oplopenone				1610	1606			-	3.69±0.30	-	-	-	-	-	-	-	-	-	-	-	-	-
	Phenol	PN2	27.536	4-Ethyl-2-methoxyphenol				1283	1282			-	-	-	-	-	-	-	-	-	-	-	-	19.66±2.19	-	-
		PN3	30.922	Eugenol	97-53-0	913	918	1363	1357			-	-	-	-	-	-	-	34.18±3.94	-	-	12.91±0.45	-	-	-	-	1
		PN8	37.227	2,4-Di-tert-butylphenol	96-76-4		690	1520	1519	1548	1555	8.72±1.03	8.87±0.76	0.59±0.04	2.94±0.39	9.15±0.33	6.33±1.04	6.36±0.67	5.23±0.32	8.75±0.57	9.48±0.62	1.93±0.20	13.11±0.26	11.91±1.19	11.66±0.65	8.51±1.06
	Acid	AC1	11.032	2-Oxopentanedioic acid	328-50-7			877				-	5.57±0.24	0.91±0.06	5.19±0.29	6.46±0.11	1.79±0.16	6.96±0.49	-	0.91±0.05	4.87±0.69	5.86±0.16	4.70±0.45	-	-	6.32±0.23
		AC3	12.41	4-Methylvaleric acid	646-07-1			911	949			0.29±0.02	-	-	0.28±0.02	-	-	0.32±0.02	-	-	-	-	-	-	-	-
		AC4	16.294	Hexanoic acid	142-62-1	823	819	1016	990	949	974	16.77±0.67	3.14±0.30	19.09±0.69	0.77±0.06	-	-	0.69±0.02	0.50±0.04	-	29.55±2.56	1.17±0.09	0.75±0.05	-	-	12.51±1.11	1
		AC5	18.476	Heptanoic acid	111-14-8			1073	1078			1.27±0.07	1.15±0.04	-	1.24±0.11	3.97±0.45	2.40±0.28	-	8.61±0.77	0.94±0.10	0.89±0.06	1.28±0.10	1.27±0.02	8.97±0.70	6.61±0.46	1.01±0.09
		AC6	24.246	Octanoic acid	124-07-2	853	863	1208	1180	1185	1173	171.09±13.36	419.06±15.11	54.85±3.42	271.55±22.23	339.40±32.38	212.66±23.68	43.08±4.11	463.89±23.19	205.47±20.55	333.63±29.08	569.39±31.70	338.29±20.29	294.26±26.48	362.59±42.29	407.40±20.37	1
		AC7	31.981	Decanoic acid	334-48-5			1388	1373			-	105.67±4.84	-	118.91±11.47	0.66±0.03	-	-	-	-	1.26±0.08	97.12±0.97	-	-	0.56±0.03	19.50±0.19
		AC8	38.313	Dodecanoic acid	143-07-7			1549	1568			0.36±0.04	-	-	-	-	-	-	-	-	-	-	-	-	-	-
		AC9	42.31	Tridecanoic acid	638-53-9			1692	1666			-	-	0.28±0.01	-	-	-	-	-	-	-	-	-	-	0.98±0.09	-
	Alkane	AK3	14.813	Pentane, 1-(1-ethoxyethoxy)-	13442-89-2			975	972			25.84±2.69	-	-	-	33.22±2.84	14.35±1.75	-	-	-	13.32±1.16	-	15.15±1.36	-	13.63±1.67	-
		AK5	19.411	Undecane	1120-21-4			1098	1100			17.62±1.33	-	-	-	-	-	-	-	-	-	-	-	-	-	-
		AK8	36.449	Pentadecane	629-62-9	885	830	1499	1500	1552	1512	28.37±3.22	32.49±1.29	28.98±2.89	25.25±1.10	35.48±1.98	28.41±3.49	22.57±2.99	35.68±3.17	37.05±1.11	22.44±2.65	23.39±0.70	26.83±1.86	30.11±2.35	29.57±2.23	23.87±0.83	1
		AK9	42.494	Heptadecane	629-78-7	850	816	1700	1700	1761	1711	-	-	10.36±1.15	-	11.60±0.84	10.54±1.10	6.47±0.32	16.59±1.52	11.20±0.40	7.19±0.63	9.99±1.25	8.15±0.65	13.56±1.56	8.80±0.52	7.30±0.66	1
	Ether	ET2	28.513	Difurfuryl ether	4437-22-3			1306	1299			-	-	-	-	-	-	-	-	-	-	-	-	18.73±1.84	-	-
	Others	OT1	3.659	Lactamide	2043-43-8		732	649				-	-	-	-	0.33±0.02	-	-	-	-	-	-	-	-	-	-
		OT4	9.757	Chlorobenzene				847	849			3.86±0.27	-	1.44±0.06	2.46±0.32	2.60±0.31	1.65±0.04	2.20±0.18	-	-	-	1.78±0.20	-	-	-	-
		OT5	10.703	p-Xylene				869	865			0.89±0.05	-	-	1.44±0.17	-	1.58±0.09	1.12±0.08	-	-	-	-	-	-	-	-
		OT6	12.685	Oxime-, methoxy-phenyl-				919		1273	1301	64.91±2.34	51.20±4.19	43.19±4.12	50.58±5.33	48.31±0.48	45.15±0.45	64.19±5.88	51.33±3.88	67.55±6.00	57.84±5.20	58.41±4.21	44.73±4.71	67.26±5.98	35.77±5.27	37.75±2.85
		OT9	17.531	h-ser(bzl)-oh				1048				-	-	8.68±0.66	12.89±1.02	-	-	9.29±0.57	11.89±1.37	9.65±0.54	16.05±0.28	15.61±1.49	12.88±1.35	-	8.90±0.49	22.09±2.46
		OT12	19.568	Filifolone	4613-37-0			1102	1108			-	65.82±6.93	-	-	-	-	-	-	-	-	-	-	-	-	-
		OT15	22.306	Borneol	507-70-0	955	939	1164	1167			-	575.71±32.05	-	-	-	-	-	-	-	-	-	-	-	-	-	1
		OT21	36.941	2,6,10-Trimethyl-12-oxatricyclo[7.3.1.0(1,6)]tridec-2-ene				1512				-	2.41±0.29	-	-	-	-	-	-	-	-	-	-	-	-	-
		OT22	38.145	Murolan-3,9(11)-diene-10-peroxy				1545				-	0.34±0.04	-	-	-	-	-	-	-	-	-	-	-	-	-
		OT25	41.629	Neointermedeol	5945-72-2			1662				-	71.17±5.65	-	-	-	-	-	-	-	-	-	-	-	-	-
