# Supplementary material for: Aroma-Enhancing Strategies in Mead: A Metabolomics- and Machine Learning-Guided Additive Approach
Source: Research Square preprint supplement (doi:10.21203/rs.3.rs-7189594/v1), 2025-07-29
Supplement: Supplementary file 3 [file 330c8976d45feee9e78cafcc.xlsx]

## Sheet: Table S3.excel
	Table S3. Volatile compounds in 15 dry meads
						Reverse Similarity Index (DB-WAX122-7062)		Retention Index (HP-5ms Ultra Inert)		Retention Index (SH-I-5Sil)		Concentration（μg/L)
	Class	Code	RT (min)	Compound	CAS	Sample	Standard	Sample	Standard (Reference)	Sample	Standard (Reference)	Hs-DM	CmR-DM	HvL-DM	NF-DM	FM-DM	Sg-DM	PeS-DM	RCG-DM	Ct-DM	Js-DM	RrT-DM	Obt-DM	Coffee-DM	Ah-DM	Rh-DM	available
	Alcohol	AL1	2.011	Ethanol	64-17-5	953	943		427		463	6478.00±453.46	6100.39±371.07	6100.39±371.07	6600.14±228.64	7942.47±210.13	5864.75±762.42	6102.98±601.07	8780.00±526.80	7963.59±497.32	6143.85±959.70	7986.01±276.64	6978.79±184.64	8407.86±656.67	6637.14±289.30	4937.56±372.77	1
		AL4	5.414	Isoamyl alcohol	123-51-3	897	866	732	736	711	697	2908.62±76.95	3014.11±335.74	2863.04±171.28	2950.78±347.89	2544.41±110.91	2651.30±235.65	2880.67±152.43	3406.66±442.86	3208.69±262.64	3270.59±228.94	4002.30±421.66	3272.15±510.07	3287.06±398.53	2672.13±263.17	1792.06±295.01	1
		AL6	7.402	2,3-Butanediol	513-85-9			789	788	763	743	122.10±9.69	49.49±1.31	48.89±3.81	63.98±4.48	49.47±2.62	66.00±5.87	32.57±1.49	69.29±0.69	78.34±10.24	37.78±3.09	19.49±1.78	47.70±1.43	71.23±2.56	37.20±4.86	116.36±5.81	1
		AL7	7.91	1-Propoxy-2-propanol	1569-01-3			803	801			-	-	-	-	-	-	3.33±0.24	34.85±1.59	-	-	7.10±0.46	-	-	-	-
		AL8	9.903	5-Methyl-2-heptanol	54630-50-1			850	856			2.92±0.38	4.45±0.19	2.88±0.32	2.39±0.08	3.37±0.15	0.46±0.05	2.29±0.13	4.68±0.38	2.42±0.17	2.45±0.17	3.19±0.25	0.49±0.03	-	4.75±0.26	-
		AL11	11.184	3-Methyl-2-heptanol	31367-46-1							-	-	-	-	-	0.35±0.02	-	0.98±0.02	0.70±0.07	0.36±0.03	-	-	2.35±0.27	-	1.04±0.07
		AL12	11.194	2-Heptanol	543-49-7			881	900	891	879	-	0.62±0.03	0.38±0.03	-	-	-	-	-	-	-	-	-	-	-	-	1
		AL14	12.383	3-Methyl-2-hexanol	2313-65-7	793	785	911	909			-	-	-	-	-	-	-	-	-	0.36±0.03	-	-	2.35±0.22	-	-
		AL15	14.127	6-Methyl-2-heptanol	4730-22-7			957	956			-	-	-	-	0.77±0.05	-	-	-	-	-	-	-	-	-	-
		AL17	16.731	Eucalyptol	470-82-6	927	938	1032	1026			-	105.78±8.39	-	-	-	-	-	-	-	-	-	-	-	-	-	1
		AL18	16.807	2-Ethyl-1-hexanol	104-76-7	863	871	1028	1030	959	995	-	-	-	-	-	-	-	-	-	-	-	-	-	-	32.15±1.79
		AL19	18.282	cis-5-Ethenyltetrahydro-α,α,5-trimethyl-2-furanmethanol	5989-33-3	890	931	1068	1074			-	-	-	-	-	-	-	-	-	-	-	-	-	-	6.01±0.78
		AL21	18.482	1-Octanol	111-87-5	901	891	1074	1071			-	6.51±0.33	-	-	-	-	-	-	-	-	-	-	-	-	-
		AL23	19.481	Linalool	78-70-6	912	879	1100	1099			-	-	-	-	-	-	-	-	-	8.57±0.54	-	-	-	-	-	1
		AL25	19.713	(E)-3-Pentadecen-2-ol				1105				-	-	-	-	-	-	-	-	-	-	-	-	-	-	5.67±0.25
		AL26	20.27	Phenylethyl alcohol	60-12--8	926	927	1118	1116	1108	1136	2203.35±79.44	1637.99±114.66	2284.69±197.86	2485.91±174.01	2647.30±165.33	2053.75±74.05	1958.73±206.36	3322.25±217.85	2527.67±285.85	2896.60±104.43	3020.20±356.07	2246.76±312.12	2350.62±192.40	2287.00±199.37	5704.87±374.09	1
		AL33	22.814	Terpinen-4-ol	562-74-3			1176	1177			-	9.82±0.98	-	-	-	-	-	-	-	-	-	-	-	-	-
		AL37	23.451	α-Terpineol	98-55-5			1190	1189			-	3.38±0.32	-	-	-	-	-	-	-	-	-	-	-	-	-
		AL41	25.17	cis-Geraniol	106-25-2			1229	1228			-	1.25±0.13	-	-	-	-	-	-	-	-	-	-	-	-	-
		AL42	25.386	Citronellol	106-22-9	855	863	1234	1228			-	-	-	-	-	-	-	38.94±3.56	-	-	36.97±1.47	-	-	-	-
		AL43	25.439	3,6-Octadien-1-ol, 3,7-dimethyl-, (Z)-	5944-20-7			1235	1240			-	-	-	-	-	-	-	-	-	-	-	-	4.09±0.40	-	-	1
		AL45	28.638	2-Undecanol	1653-30-1	897	886	1309	1307			-	-	-	-	-	-	-	-	-	-	-	-	-	0.64±0.03	-
		AL47	35.628	1-Dodecanol	112-53-8	845	856	1478	1473	1429	1457	10.42±1.01	-	-	-	-	-	-	-	3.66±0.13	8.16±0.56	-	-	6.03±0.04	6.80±0.45	0.87±0.01	1
		AL49	36.967	Butylated Hydroxytoluene	128-37-0	921	897	1513	1513			1.11±0.05	-	-	-	-	0.26±0.02	0.17±0.01	-	0.18±0.01	-	0.50±0.06	-	3.10±0.13	0.27±0.04	0.09±0.01	1
		AL51	41.062	γ-Eudesmol	1209-71-8			1638	1631			-	-	-	-	-	-	-	4.62±0.51	-	-	-	-	-	-	-	1
	Ester	ES1	3.043	Ethyl acetate	141-78-6	928	912	600	612	605	586	396.69±37.84	396.86±23.42	353.03±3.53	449.10±42.84	340.96±27.28	239.83±4.15	300.73±26.04	18.85±1.32	397.55±36.43	411.61±33.69	414.37±27.17	319.61±5.53	326.62±38.51	334.11±15.31	356.34±22.25	1
		ES6	7.969	Ethyl butyrate	105-54-4	898	923	804	802	804	785	-	-	-	-	-	-	-	-	-	-	-	4.44±0.11	-	-	-	1
		ES9	10.168	Ethyl isovalerate	108-64-5	868	903	857	854	789	820	0.18±0.003	-	-	-	-	-	-	-	-	-	-	-	-	-	-	1
		ES10	11.178	Isoamyl acetate	123-92-2	874	904	881	876	849	820	88.92±6.22	70.92±6.30	60.19±5.80	49.84±2.17	68.86±7.67	57.52±4.03	31.20±3.54	153.52±4.6	79.41±7.57	43.80±3.47	75.08±5.66	66.60±5.91	83.28±4.32	84.70±3.05	48.35±6.91	1
		ES15	15.229	Diethoxymethyl acetate	14036-06-7	912	946	986	922			-	-	-	-	3.54±0.32	3.77±0.25	-	10.11±0.70	-	-	-	-	-	4.11±0.57	-
		ES18	16.17	Ethyl caproate	123-66-0	892	878	1011	1000	997	984	-	-	0.50±0.02	-	-	-	-	0.76±0.06	0.73±0.09	-	-	-	-	0.53±0.04	0.12±0.05	1
		ES21	18.104	Ethyl 5-methylhexanoate	10236-10-9	833	814	1063	1072			-	31.23±1.95	30.52±2.14	45.35±3.59	-	29.77±4.41	-	59.98±1.19	0.78±0.03	-	36.20±4.52	18.71±1.48	69.40±4.22	41.33±2.71	20.60±1.98
		ES22	18.158	Heptanoic acid, ethyl ester	106-30-9	918	946	1064				15.33±0.41	-	-	-	-	-	-	-	-	31.96±3.24	-	-	-	-	-
		ES26	23.776	Ethyl caprylate	106-32-1	902	898	1197	1196	1173	1183	2819.03±140.95	1956.89±255.89	1733.61±210.19	2086.62±185.46	2295.14±182.17	1805.16±109.80	1130.36±98.54	3323.34±87.92	2063.28±185.69	1595.64±157.15	1424.44±173.29	1776.35±64.04	2410.94±210.18	2356.74±311.76	25.59±2.27	1
		ES30	25.931	Ethyl phenylacetate	101-97-3	861	833	1247	1246	1217	1259	-	-	-	-	-	-	-	4.74±0.41	-	-	4.25±0.22	-	-	0.88±0.03	0.51±0.07	1
		ES32	26.515	Phenethyl acetate	103-45-7	892	886	1260	1258	1218	1259	128.72±10.99	133.91±9.37	110.04±4.40	100.66±14.55	119.34±9.77	109.05±2.89	84.12±11.78	391.05±39.10	114.08±4.56	144.66±12.52	149.72±12.79	121.46±9.48	124.30±11.04	139.18±20.50	53.19±8.25	1
		ES34	27.519	(-)-Borneol acetate	5655-61-8			1283	1284			-	36.17±2.82	-	-	-	-	-	-	-	-	-	-	-	-	-
		ES35	28.146	Ethyl nonanoate	123-29-5	772	756	1297	1296	1309	1282	20.71±2.44	8.76±0.68	20.84±1.91	17.76±1.55	17.25±0.96	13.70±0.55	9.88±0.77	11.46±1.48	12.97±0.59	14.90±1.94	18.40±1.63	16.56±1.86	17.24±1.30	15.97±1.24	19.37±0.15	1
		ES37	30.015	4,6-Heptadienoic acid, 3,3,6-trimethyl-, ethyl ester				1342				-	13.85±1.23	-	-	-	-	-	-	-	-	-	-	-	-	-
		ES38	30.296	n-Caprylic acid isobutyl ester	5461-06--3	825	809	1348	1348			-	-	-	-	-	-	-	0.55±0.03	-	-	-	-	2.18±0.22	-	-
		ES39	30.42	Ethyl 3-phenylpropionate	2021-28-5	916	912	1351	1353	1373	1359	20.97±3.09	32.13±3.70	33.83±1.17	57.55±4.57	61.50±3.42	23.38±2.92	25.80±3.22	14.74±0.15	33.98±2.94	42.90±1.28	42.34±3.46	41.44±2.87	56.43±8.31	30.42±2.12	2.94±0.33	1
		ES44	31.836	Geranyl acetate	105-87-3			1385	1382			-	-	-	-	-	-	-	2.41±0.02	-	-	-	-	-	-	-
		ES46	31.997	Ethyl 9-decenoate	67233-91-4	848	835	1389	1387	1359	1371	1058.64±100.99	289.11±13.25	407.29±36.20	326.86±37.12	421.81±30.42	339.31±25.62	197.20±6.83	1056.32±119.97	386.30±17.70	252.38±6.67	225.32±16.24	847.93±25.43	623.13±34.69	869.06±90.73	-	1
		ES47	32.37	Ethyl caprate	110-38-3	754	782	1398	1396	1353	1381	3440.21±259.73	1163.01±50.69	2435.13±42.18	1600.54±125.01	1745.28±106.16	1905.54±190.55	1457.55±105.11	2383.68±211.86	1889.03±167.90	1236.71±56.67	1659.29±125.27	2238.11±80.69	4546.45±283.92	3337.24±462.42	1548.31±25.16	1
		ES48	34.348	3-Methylbutyl octanoate	2035-99-6	936	917	1447	1446			-	-	-	-	-	-	-	-	-	-	-	-	20.88±1.46	-	16.51±2.83	1
		ES52	38.296	n-Capric acid isobutyl ester	30673-38-2	814	874	1549	1546			2.19±0.17	-	-	-	-	-	-	-	-	-	-	-	4.78±0.29	1.99±0.11	-	1
		ES53	38.318	Butyl caprate	30673-36-0	802	833	1549	1590			-	-	2.04±0.14	0.40±0.03	-	-	-	-	-	-	-	-	-	-	-
		ES55	40.057	Ethyl laurate	106-33-2	821	839	1597	1595	1593	1580	548.90±19.79	21.39±0.43	728.70±56.91	459.68±47.99	512.01±27.09	365.51±29.92	379.85±24.91	129.78±14.03	350.44±6.07	90.02±9.13	469.93±29.34	311.70±16.49	1591.28±15.91	480.10±44.00	24.56±0.42	1
		ES58	41.359	Isoamyl caprate	2306-91-4			1650	1646			33.46±0.58	-	21.16±0.55	8.94±0.95	10.28±1.25	12.20±0.21	14.36±1.08	-	13.91±1.08	4.42±0.29	14.45±1.70	10.78±0.74	43.89±3.07	19.99±1.31	-	1
		ES59	44.163	Ethyl myristate	124-06-1	850	873	1798	1794	1749	1779	13.70±0.27	12.59±0.65	16.06±1.00	19.52±0.19	21.79±2.08	8.38±0.66	7.30±0.62	34.19±2.96	10.57±0.46	16.14±2.24	13.74±0.90	18.09±1.41	36.06±5.93	8.42±0.74	2.47±0.12	1
		ES61	45.205	Diisobutyl phthalate	84-69-5			1874	1870			-	-	-	-	-	-	-	-	-	-	-	-	-	-	5.78±0.80	1
		ES62	46.464	Ethyl 9-hexadecenoate	54546-22-4	729	789		1977	1945	1986	-	-	-	20.53±1.55	13.40±1.28	28.52±0.29	-	-	-	30.04±2.08	-	-	16.29±1.17	-	-	1
		ES63	46.686	Ethyl palmitate	628-97-7	752	740		1993			11.57±0.81	27.86±4.12	53.45±3.85	57.66±4.57	81.25±1.41	17.66±1.41	18.27±2.70	66.72±3.05	31.41±2.17	35.09±4.25	28.98±1.44	30.12±2.87	64.88±5.76	31.31±3.08	7.10±0.46
	Alkene	AE9	19.735	3-Ethoxy-3,7-dimethyl-1,6-octadiene	72845-33-1		761	1106				-	-	-	-	-	-	-	-	-	-	-	2.52±0.39	-	-	-
		AE12	35.401	β-Chamigrene	18431-82-8	926	898	1473	1476			-	15.45±1.47	-	-	-	-	-	-	-	-	-	-	-	-	-
		AE14	35.833	γ-Selinene	515-17-3			1484	1479			-	0.45±0.03	-	-	-	-	-	-	-	-	-	-	-	-	-
		AE15	35.86	β-Eudesmene	17066-67-0			1484	1486			-	1.82±0.15	-	-	-	-	-	-	-	-	-	-	-	-	-
		AE16	36.195	α-Selinene	473-13-2	837	823	1493	1494			-	3.59±0.25	-	-	-	-	-	-	-	-	-	-	-	-	-
		AE18	38.113	α-Calacorene	21391-99-1			1544	1542			-	-	-	-	-	-	-	12.04±1.39	-	-	-	-	-	-	-
	Aldehyde	AD2	9.655	Furfural	98-01--1			844	833			-	-	-	-	-	-	-	-	-	-	-	-	28.42±1.77	-	-
		AD3	10.384	Isobutanal diethyl acetal	1741-41-9			862	859			-	-	-	-	-	-	-	-	-	-	0.30±0.04	-	-	-	-
		AD5	14.673	Benzaldehyde	100-52-7			972	962	923	982	-	-	-	-	-	-	-	-	-	-	-	-	-	-	10.50±0.25	1
		AD6	17.347	Phenylacetaldehyde	122-78-1	759	801	1043	1045	1137	1095	-	-	-	-	-	-	-	-	-	-	-	-	-	-	4.73±0.39	1
		AD14	27.233	Benzenebutanal	18328-11-5			1277				-	-	-	-	0.88±0.15	-	-	-	-	-	-	1.64±0.12	-	-	-
	Ketone	KE8	28.778	trans-β-Ionone	79-77-6			1312	1314			-	-	-	-	-	-	-	-	-	-	-	5.00±0.43	-	-	-
		KE10	31.765	β-Damascenone	36649-63-5			1383	1386			-	-	-	-	-	-	-	-	-	1.97±0.29	-	2.57±0.10	-	-	-
		KE19	36.956	Shyobunon	21698-44-2			1512	1503			-	-	-	-	-	-	-	-	-	-	-	0.55±0.06	-	0.85±0.06	-
	Phenol	PN3	30.922	Eugenol	97-53-0	913	918	1363	1357			-	-	-	-	-	-	-	5.32±0.61	-	-	-	-	-	-	-	1
		PN8	37.227	2,4-Di-tert-butylphenol	96-76-4		690	1520	1519	1548	1555	2.57±0.32	16.25±0.99	1.74±0.09	3.81±0.25	0.89±0.09	2.08±0.15	2.31±0.18	2.60±0.09	3.85±0.26	4.15±0.53	11.16±0.87	2.34±0.21	0.68±0.05	0.42±0.04	5.21±0.41	1
	Acid	AC1	11.032	2-Oxopentanedioic acid	328-50-7			877				-	-	-	1.09±0.08	-	-	0.89±0.05	-	-	1.75±0.08	-	-	-	-	-
		AC2	11.054	2-Methylhexanoic acid	4536-23-6		744	878				-	-	-	-	-	-	-	-	-	-	-	-	-	-	5.80±0.46
		AC4	16.294	Hexanoic acid	142-62-1	823	819	1016	990	949	974	-	-	-	-	-	-	0.41±0.05	-	-	0.94±0.08	0.42±0.06	-	-	-	-	1
		AC5	18.476	Heptanoic acid	111-14-8			1073	1078			0.98±0.09	-	-	0.23±0.02	40.62±4.99	0.18±0.01	16.57±1.15	-	-	1.72±0.11	-	-	-	-	4.21±0.41
		AC6	24.246	Octanoic acid	124-07-2	853	863	1208	1180	1185	1173	-	-	-	-	-	-	8.83±0.84	-	-	0.31±0.03	-	-	-	-	-	1
		AC11	45.108	Pentadecanoic acid	1002-84-2		599	1867	1867			-	-	-	-	-	-	-	1.03±0.11	-	-	-	-	-	-	-
	Alkane	AK2	11.043	1-Butoxy-1-ethoxyethane	57006-87-8			878	872			-	-	3.49±0.48	-	-	-	-	-	-	-	6.40±0.17	-	-	-	-
		AK3	14.813	Pentane, 1-(1-ethoxyethoxy)-	13442-89-2			975	972			5.69±0.26	-	22.55±2.54	21.37±1.75	28.34±2.25	11.21±1.17	24.03±0.72	5.82±0.35	8.71±0.77	32.02±4.16	44.08±3.84	20.01±1.24	13.24±1.26	-	3.83±0.59
		AK5	19.411	Undecane	1120-21-4			1098	1100			-	-	-	-	-	-	-	-	-	-	-	-	-	-	7.83±0.16
		AK6	19.724	1-Methoxynonane	7289-51-2			1105	1126			-	-	-	-	-	-	-	-	-	-	-	-	-	0.89±0.07	-
		AK8	36.449	Pentadecane	629-62-9	885	830	1499	1500	1552	1512	-	-	-	16.93±1.61	-	-	15.90±0.79	-	-	-	-	-	27.92±0.48	-	-	1
		AK9	42.494	Heptadecane	629-78-7	850	816	1700	1700	1761	1711	15.26±1.37	-	8.73±0.09	10.95±1.26	13.83±0.72	11.31±0.99	8.03±0.21	17.22±1.58	14.48±0.95	11.60±1.81	11.79±0.73	7.72±0.68	15.46±1.26	14.41±1.66	7.59±0.59	1
	Ether	ET2	28.513	Difurfuryl ether	4437-22-3			1306	1299			-	-	-	-	-	-	-	-	-	-	-	-	5.92±0.47	-	-
	Others	OT1	3.659	Lactamide	2043-43-8		732	649				-	-	0.67±0.10	-	-	1.45±0.03	-	-	-	-	-	-	-	-	-
		OT6	12.685	Oxime-, methoxy-phenyl-	-			919		1273	1301	33.08±2.49	30.29±1.98	20.47±0.74	20.63±1.07	18.04±0.31	15.00±1.08	16.86±1.89	26.62±0.46	20.13±1.40	15.67±1.09	15.15±2.00	10.15±0.71	23.18±1.44	13.19±0.26	28.96±1.76
		OT12	19.568	Filifolone	4613-37-0			1102	1108			-	20.06±0.72	-	-	-	-	-	-	-	-	-	-	-	-	-
		OT15	22.306	Borneol	507-70-0	955	939	1164	1167			-	306.6±15.33	-	-	-	-	-	-	-	-	-	-	-	-	-
		OT20	30.917	4-(2,4-Dimethylcyclohex-3-enyl)but-3-en-2-one	2316-82-7			1363				-	-	-	-	-	-	-	-	-	-	-	-	5.91±0.47	-	-
		OT25	41.629	Neointermedeol	5945-72-2			1662				-	25.89±1.87	-	-	-	-	-	-	-	-	-	-	-	-	-
