# Supplementary material for: Aroma-Enhancing Strategies in Mead: A Metabolomics- and Machine Learning-Guided Additive Approach
Source: Research Square preprint supplement (doi:10.21203/rs.3.rs-7189594/v1), 2025-07-29
Supplement: Supplementary file 4 [file 4b0b413571e40ead0f134bad.xlsx]

## Sheet: Table S1.excel
	Table S1. Volatile compounds in 15 honey solutions
						Reverse Similarity Index (DB-WAX122-7062)		Retention Index (HP-5ms Ultra Inert)		Retention Index (SH-I-5Sil)		Concentration（μg/L)
	Class	Code	RT (min)	Compound	CAS	Sample	Standard	Sample	Standard (Reference)	Sample	Standard (Reference)	Hs-HS	CmR-HS	HvL-HS	NF-HS	FM-HS	Sg-HS	PeS-HS	RCG-HS	Ct-HS	Js-HS	RrT-HS	Obt-HS	Coffee-HS	Ah-HS	Rh-HS	available
	Alcohol	AL2	3.664	2-Nitroethanol	625-48-9			649	658			-	1.49±0.13	-	-	-	-	-	-	-	-	-	-	-	1.63±0.14	-
		AL4	5.414	Isoamyl alcohol	123-51-3	897	866	732	736	711	697	24.26±1.35	75.19±3.97	40.71±2.48	31.41±2.19	42.21±3.61	39.77±3.79	25.63±2.03	62.47±5.96	104.25±9.09	39.49±4.39	74.32±3.41	35.95±3.43	45.05±4.00	39.11±3.48	63.93±7.12	1
		AL5	5.771	2-Methyl-1-butanol	137-32-6			742	739		697	0.79±0.057	-	-	-	-	-	-	-	-	-	-	-	-	-	-
		AL8	9.903	5-Methyl-2-heptanol	54630-50-1			850	856			1.39±1.13	-	-	-	5.15±0.26	-	-	-	-	-	-	0.41±0.01	-	-	-	1
		AL9	10.681	2-Furanmethanol	98-00-0			869	859			-	-	-	-	-	-	-	-	-	-	-	-	158.76±10.41	-	-
		AL12	11.194	2-Heptanol	543-49-7			881	900	891	879	-	-	-	-	-	1.11±0.12	2.10±0.19	-	-	-	-	-	-	-	-	1
		AL13	12.172	Hexacose	111-28-4			905	916			-	-	-	-	-	-	-	-	-	-	-	-	1.70±0.14	-	-
		AL17	16.731	Eucalyptol	470-82-6	927	938	1032	1026			-	1281.17±25.62	0.66±0.05	-	-	-	-	-	-	-	-	-	-	-	-	1
		AL18	16.807	2-Ethyl-1-hexanol	104-76-7	863	871	1028	1030	959	995	-	-	-	-	-	-	-	-	-	-	-	-	57.15±8.93	-	-
		AL19	18.282	2-Furanmethanol, 5-ethenyltetrahydro-α,α,5-trimethyl-, cis-	5989-33-3	890	931	1068	1074			46.53±2.02	55.74±2.94	61.70±1.63	63.06±3.15	51.86±4.49	58.29±4.98	69.91±6.41	55.05±4.16	43.87±2.44	49.07±3.22	56.63±4.49	72.20±6.89	80.99±5.06	51.20±5.35	60.67±3.38	1
		AL21	18.482	1-Octanol	111-87-5	901	891	1074	1071			-	73.54±5.83	-	-	-	-	-	-	-	-	-	-	-	-	-
		AL23	19.481	Linalool	78-70-6	912	879	1100	1099			-	-	-	26.31±1.99	-	-	62.74±4.11	-	-	89.01±7.29	-	36.79±2.87	-	-	-	1
		AL24	19.703	1,5,7-Octatrien-3-ol	-			1105	1107			-	145.87±12.46	-	-	69.09±5.90	-	-	-	-	-	-	-	-	84.10±7.28	-
		AL26	20.27	Phenylethyl alcohol	60-12--8	926	927	1118	1116	1108	1136	2.59±0.23	-	-	25.70±1.36	3.61±0.22	4.65±0.19	22.33±2.05	37.82±2.36	37.91±4.27	27.89±4.83	217.33±19.92	20.93±1.31	27.86±3.87	11.29±0.11	36.89±2.24	1
		AL27	20.961	1,3,3-Trimethylcyclohex- 2,2,4-Trimethyl-3-cyclohexene-1-carbaldehyde	-			1133	1138			-	108.29±1.87	-	-	-	-	-	-	-	-	-	-	-	-	-
		AL28	21.301	cis-Sabinol	3310-02--9			1141	1143			-	-	-	-	-	-	-	4.69±0.48	-	-	-	-	-	-	-
		AL29	21.404	(E)-p-2-Menthen-1-ol	29803-81-4	775	760	1143	1140			-	-	-	-	-	-	-	5.40±0.46	-	-	-	-	-	-	-
		AL30	21.458	trans-Chrysanthenol	38043-83-3			1145	1142			-	13.43±1.41	-	-	-	-	-	-	-	-	-	-	-	-	-
		AL31	22.19	cis-Chrysanthenol	55722-60-6			1161	1162			-	260.35±17.07	-	-	-	-	-	-	-	-	-	-	-	-	-
		AL32	22.469	Epoxylinalol	14049-11-7			1168	1178			-	-	-	-	-	-	-	-	-	-	-	1.27±0.09	-	-	-
		AL33	22.814	Terpinen-4-ol	562-74-3			1176	1177			-	142.59±13.60	-	-	-	-	-	-	-	-	-	-	-	-	-
		AL34	23.295	3,7-Octadiene-2,6-diol, 2,6-dimethyl-	13741-21-4			1186	1190			-	-	-	-	-	-	2.84±0.37	-	-	-	-	-	-	-	-
		AL35	23.43	trans-p-mentha-1(7),8-dien-2-ol	21391-84-4			1190	1185			-	-	-	3.40±0.32	-	-	-	-	-	-	-	-	-	-	-
		AL36	23.446	(-)-α-Terpineol	-			1190	1190			-	40.34±2.00	-	-	-	-	-	-	-	-	-	-	-	-	-
		AL37	23.451	α-Terpineol	98-55-5			1190	1189			-	-	-	-	-	-	-	10.21±0.44	-	-	-	-	-	-	-
		AL38	23.544	Isocarveol	35907-10-9			1192	1186			-	-	-	-	-	-	-	-	-	-	-	-	3.04±0.42	-	-
		AL39	24.716	Nopol	128-50-7			1219	1202			-	-	-	-	-	-	-	-	0.85±0.05	-	-	-	-	-	-
		AL40	25.051	Grandlure II	26532-23-0			1227	1225			-	-	-	-	-	-	-	-	-	-	-	2.57±0.19	-	-	-
		AL42	25.386	Citronellol	106-22-9	855	863	1234	1228			-	-	-	-	-	-	-	366.08±20.38	-	-	48.73±4.16	-	-	-	-	1
		AL44	26.439	2,6-Octadien-1-ol, 2,7-dimethyl-	22410-74-8			1258				-	-	-	-	-	-	-	269.50±39.89	-	-	-	-	-	-	-
		AL45	28.638	2-Undecanol	1653-30-1	897	886	1309	1307			-	-	-	-	-	0.44±0.03	-	-	-	-	-	-	-	-	-	1
		AL46	34.321	1-Cyclohexene-1-propanol, α,2,6,6-tetramethyl-	3293-47-8			1446	1452			-	-	-	-	-	-	1.34±0.11	-	-	-	-	4.45±0.62	-	-	-
		AL51	41.062	γ-Eudesmol	1209-71-8			1638	1631			-	-	-	-	-	-	-	3.71±0.42	-	-	-	-	-	-	-	1
		AL52	41.586	α-Eudesmol	473-16-5			1661	1653			-	-	-	-	-	-	-	10.56±1.06	-	-	-	-	-	-	-
		AL53	42.316	4(15),5,10(14)-Germacratrien-1-ol	-			1692	1695			-	0.42±0.04	-	-	-	-	-	-	-	-	-	-	-	-	-
	Ester	ES1	3.043	Ethyl acetate	141-78-6	928	912	600	612	605	586	-	-	-	-	-	-	24.49±2.12	38.48±2.34	51.50±6.73	-	8.06±0.91	-	-	-	38.45±1.76	1
		ES3	3.675	Diethyl azodicarboxylate	1972-28-7			650				-	-	-	1.57±0.22	-	-	-	1.59±0.13	-	-	-	-	-	-	-
		ES4	4.442	Ethyl methyl carbonate	623-53-0			704				7.22±0.21	9.52±0.34	-	-	-	-	-	-	-	-	-	-	-	-	-
		ES6	7.969	Ethyl butyrate	105-54-4	898	923	804	802	804	785	3.54±0.37	4.55±0.05	2.06±0.16	-	-	5.17±0.36	39.34±1.04	5.85±0.10	4.69±0.22	-	5.23±0.45	1.51±0.11	9.54±0.48	2.10±0.21	4.16±0.17	1
		ES7	8.628	Butyl acetate	123-86-4			820	812			0.82±0.07	1.68±0.25	1.26±0.10	1.79±0.16	1.49±0.15	1.83±0.23	1.04	0.55±0.01	2.30±0.92	1.81±0.13	2.19±0.26	1.67±0.19	1.36±1.53	1.22±0.11	1.60±0.08
		ES8	10.011	Ethyl 2-methylbutyrate	7452-79-1	910	921	853	849	862	820	-	-	1.20±0.06	-	-	-	-	5.17±0.60	4.51±0.28	-	5.84±0.31	-	-	1.43±0.21	4.52±0.18
		ES9	10.168	Ethyl isovalerate	108-64-5	868	903	857	854	789	820	-	7.22±0.31	-	0.91±0.13	-	1.00±0.13	1.41±0.09	4.26±0.15	1.98±0.05	-	5.18±0.46	-	3.17±0.15	-	1.60±0.11	1
		ES10	11.178	Isoamyl acetate	123-92-2	874	904	881	876	849	820	-	-	-	-	-	-	-	-	4.09±0.23	-	-	-	-	-	-	1
		ES13	14.284	Ethyl 3-methylvalerate	5870-68-8	882	890	961	960	962	920	6.96±0.21	12.80±0.46	6.04±0.26	6.79±0.71	8.24±0.76	7.28±0.13	7.87±0.72	9.03±0.63	17.30±1.21	5.96±0.31	14.84±2.44	5.28±0.24	9.82±1.45	6.23±0.57	15.09±1.09
		ES16	15.662	Furfuryl acetate	623-17-6			998	995			-	-	-	-	-	-	-	-	-	-	-	-	426.09±22.55	-	-
		ES17	15.694	4-Ethylbenzoic acid, 6-ethyl-3-octyl ester	-			998				-	-	-	0.92±0.08	1.37±0.06	-	-	-	-	-	-	-	-	-	-
		ES18	16.17	Ethyl caproate	123-66-0	892	878	1011	1000	997	984	-	-	-	-	-	-	25.67±1.80	-	-	-	-	-	-	-	-	1
		ES19	16.283	Hexyl acetate	142-92-7			1014	1011			-	-	-	-	-	-	22.65±1.19	-	-	-	-	-	-	-	-
		ES20	17.234	2-Heptyl acetate	5921-82-4			1040	1045			-	-	-	-	-	2.63±0.23	1.33±1.04	-	-	-	-	-	-	-	-
		ES23	22.625	Ethyl benzoate	93-89-0			1171	1171			158.23±16.05	176.68±15.09	128.55±16.06	209.02±11.64	175.78±15.62	173.98±7.97	132.35±17.51	608.70±43.89	414.96±4.15	202.21±16.05	406.73±50.80	151.51±12.95	210.41±16.43	183.26±12.83	323.82±8.57
		ES24	23.435	7-Octenoic acid, ethyl ester	35194-38-8			1190	1187			-	-	-	-	-	-	-	-	-	-	0.37±0.02	-	-	-	-
		ES25	23.538	Hexyl butyrate	2639-63-6			1192	1192			-	-	-	-	-	-	40.91±2.16	-	-	-	-	-	-	-	-
		ES26	23.776	Ethyl caprylate	106-32-1	902	898	1197	1196	1173	1183	69.63±4.56	61.55±5.87	31.77±2.91	56.27±4.06	77.79±2.06	31.73±0.63	38.69±5.06	75.70±7.22	56.99±3.47	42.52±3.38	45.07±3.58	30.56±2.00	48.54±4.93	34.26±0.34	35.84±3.42	1
		ES27	24.829	Furfuryl 3-methylbutanoate	13678-60-9			1222	1224			-	-	-	-	-	-	-	-	-	-	-	-	38.57±2.31	-	-
		ES28	24.975	Bornyl formate	7492-41-3			1225	1226			-	5.68±0.63	-	-	-	-	-	-	-	-	-	-	-	-	-
		ES29	25.337	trans-Chrysanthenyl acetate	50764-55-1			1233	1239			-	35.23±3.36	-	-	-	-	-	-	-	-	-	-	-	-	-
		ES30	25.931	Ethyl phenylacetate	101-97-3	861	833	1247	1246	1217	1259	15.90±2.22	35.83±3.45	11.12±0.87	13.75±0.86	17.26±1.41	18.12±1.37	9.76±0.09	25.93±1.96	50.27±3.48	18.35±1.77	40.45±3.86	11.83±0.54	33.09±2.88	12.07±0.96	34.31±2.75	1
		ES31	26.475	(Z)-chrysanthenyl acetate	-			1259	1262			-	478.71±78.80	-	-	-	-	-	-	-	-	-	-	-	-	-
		ES32	26.515	Phenethyl acetate	103-45-7	892	886	1260	1258	1218	1259	61.39±4.87	10.81±1.27	32.99±1.44	50.25±4.35	29.75±2.54	28.15±2.13	39.69±3.25	-	235.59±13.12	51.76±5.76	193.44±12.68	55.11±5.26	61.57±3.84	44.34±1.60	88.86±7.75	1
		ES33	26.823	Benzenepropanoic acid, methyl ester	103-25-3			1267	1279			-	-	-	-	-	9.02±1.18	-	-	-	-	9.60±1.17	-	-	-	-
		ES34	27.519	(-)-Borneol acetate	5655-61-8			1283	1284			-	704.92±37.30	-	-	0.90±0.10	-	-	1.89±0.21	-	-	-	-	-	-	-
		ES35	28.146	Ethyl nonanoate	123-29-5	772	756	1297	1296	1309	1282	55.26±3.98	58.05±3.23	31.83±2.30	48.87±5.15	51.14±3.11	44.74±1.61	35.29±4.94	149.24±15.79	75.89±11.18	61.37±4.87	59.20±5.16	57.23±4.96	52.98±4.86	53.80±1.94	41.48±1.90	1
		ES36	28.551	Limonen-6-ol, pivalate	-			1307				-	0.88±0.07	0.46±0.05	-	-	-	-	-	-	-	-	-	-	-	-
		ES39	30.42	Ethyl 3-phenylpropionate	2021-28-5	916	912	1351	1353	1373	1359	23.53±1.31	91.33±5.09	17.38±1.76	14.36±1.23	17.36±1.42	19.78±2.23	15.86±0.99	77.89±4.67	91.32±6.89	19.64±1.09	72.58±4.36	9.94±1.13	61.73±4.90	14.32±0.72	34.09±1.90	1
		ES40	31.333	Propanoic acid, 2-methyl-, 2-ethyl-3-hydroxyhexyl ester	-			1373	1373			-	7.54±0.46	4.50±0.27	-	-	-	-	-	-	-	-	-	-	-	-
		ES41	31.339	Propanoic acid, 2-methyl-, 3-hydroxy-2,2,4-trimethylpentyl ester	77-68-9			1373	1380			-	-	-	-	-	4.52±0.31	-	-	-	-	-	-	-	-	-
		ES42	31.349	Propanoic acid, 2-methyl-, 2-ethyl-3-hydroxyhexyl ester	74367-31-0			1373	1373			-	-	-	-	2.88±0.08	3.30±0.23	0.35±0.03	-	-	3.59±0.41	-	4.85±0.21	29.15±4.29	3.06±0.24	-
		ES43	31.776	cis-3-Hexenyl hexanoate	31501-11-8			1384	1380			-	-	-	-	-	-	1.52±0.17	-	-	-	-	-	-	-	-
		ES45	31.971	Hexyl caproate	6378-65-0			1388	1384			-	-	-	-	-	-	12.81±1.52	-	-	-	-	-	-	-	-
		ES47	32.37	Ethyl caprate	110-38-3	754	782	1398	1396	1353	1381	22.38±1.99	83.34±8.82	34.07±3.25	38.14±2.38	84.02±7.32	32.39±0.32	19.41±1.75	42.23±5.52	47.23±3.31	28.09±4.39	36.56±2.99	20.56±0.89	26.77±1.67	29.53±3.91	26.50±3.92	1
		ES50	34.504	Ethyl trans-2-decenoate	7367-88-6	768	752	1451				-	-	-	-	-	-	-	3.57±0.28	-	-	-	-	-	-	-
		ES51	37.799	2(4H)-Benzofuranone, 5,6,7,7a-tetrahydro-4,4,7a-trimethyl-, (R)-	17092-92-1			1535	1532			-	-	-	3.37±0.23	-	-	-	-	-	-	-	-	-	-	-
		ES54	39.442	cis-3-Hexenyl benzoate	25152-85-6			1580				-	-	-	-	-	-	-	-	-	4.59±0.42	-	-	-	-	-
		ES55	40.057	Ethyl laurate	106-33-2	821	839	1597	1595	1593	1580	-	6.99±0.25	-	-	349.58±45.45	-	-	14.52±1.51	16.94±2.06	-	-	-	-	-	-	1
		ES56	40.09	2,2,4-Trimethyl-1,3-pentanediol diisobutyrate	6846-50-0			1598	1588			-	-	-	-	-	-	-	-	-	-	-	0.65±0.03	13.01±1.48	-	-
		ES59	44.163	Ethyl myristate	124-06-1	850	873	1798	1794	1749	1779	-	3.87±0.28	1.32±0.07	-	7.51±0.45	1.71±0.09	-	69.49±9.65	3.81±0.29	2.57±0.24	2.10±0.27	-	-	-	4.74±0.22	1
		ES61	45.205	Diisobutyl phthalate	84-69-5			1874	1870			-	2.26±0.05	-	2.01±0.06	-	-	-	-	-	-	-	-	3.78±0.46	1.30±0.10	-	1
		ES63	46.686	Palmitic acid ethyl ester	628-97-7	752	740		1993			-	-	-	-	10.07±1.14	-	-	-	-	-	-	-	-	-	-	1
	Alkene	AE1	11.2	1-Nonene	124-11-8	811	837	881	889			-	-	2.42±0.19	-	-	-	3.60±0.47	-	-	2.30±0.30	3.34±0.13	3.98±0.31	-	-	-
		AE2	11.653	Styrene	100-42-5			892	893			8.36±0.41	10.72±1.22	9.90±0.79	8.75±1.21	4.52±0.63	10.27±1.24	8.15±0.71	15.93±1.36	7.11±0.26	6.93±0.97	2.98±0.23	9.48±0.75	-	6.44±0.84	8.93±1.01
		AE3	12.667	D-Limonene	5989-27-5			918				-	-	-	-	-	-	-	-	-	-	-	7.84±0.39	-	-	-
		AE4	15.428	β-Myrcene	123-35-3	744	726	992	991			-	-	-	-	-	-	-	15.61±1.24	-	-	-	-	-	-	-
		AE5	16.25	α-Terpinene	99-86-5			1014	1017			-	20.50±0.94	-	-	-	-	-	1.88±0.13	-	-	-	-	-	-	-
		AE6	16.656	Limonene	138-86-3			1024	1031			3.57±0.09	-	1.53±0.19	-	4.76±0.13	1.61±0.07	15.70±1.25	14.72±0.78	4.09±0.37	-	15.24±0.76	7.84±0.40	-	-	1.93±0.25
		AE7	17.077	beta-Ocimene, Z	3338-55-4	841	819	1036	1038			-	-	-	-	-	-	-	2.99±0.08	-	-	-	-	-	-	-
		AE8	17.731	γ-Terpinene	99-85-4			1053	1060			-	71.39±2.57	-	-	-	-	-	-	-	-	-	-	-	-	-
		AE10	29.869	Tricyclo[5.4.0.0(2,8)]undec-9-ene, 2,6,6,9-tetramethyl-, (1R,2S,7R,8R)-	5989-08--2	834	857	1338	1353			-	-	-	-	-	-	-	-	-	-	-	3.85±0.34	-	-	-
		AE13	35.417	γ-Gurjunene	22567-17-5			1473	1473			-	5.40±0.51	-	-	-	-	-	-	-	-	-	-	-	-	-
		AE17	36.217	(+)-Ledene	21747-46-6	858	902	1493	1493			-	1.82±0.07	-	-	-	-	-	-	-	-	-	-	-	-	-
		AE19	40.56	Aromadendrene oxide-(1)				1616	1672			-	0.42±0.03	-	-	-	-	-	-	-	-	-	-	-	-	-
	Aldehyde	AD1	3.567	Succindialdehyde	638-37-9			642				-	-	-	-	-	-	-	-	-	-	-	0.37±0.02	0.56±0.03	-	-
		AD4	14.663	2-Furancarboxaldehyde, 5-methyl-	620-02-0			971	965			-	-	-	-	-	-	-	-	-	-	-	-	18.85±2.49	-	-
		AD6	17.347	Phenylacetaldehyde	122-78-1	759	801	1043	1045	1137	1095	14.39±1.00	51.22±3.19	25.79±3.35	-	-	141.27±2.83	-	52.54±3.28	-	-	-	-	-	-	70.63±4.41	1
		AD7	19.697	Nonanal	124-19-6	832	876	1105	1104	1182	1104	135.13±8.1	-	129.39±17.12	128.88±6.82	-	98.12±14.52	199.09±17.49	125.24±15.39	82.54±2.98	98.46±4.92	85.46±5.19	126.29±7.58	-	-	97.70±3.91
		AD8	20.054	α-Cyclociral	432-24-6			1113	1116			-	297.97±28.42	-	-	-	-	-	-	-	-	-	-	-	-	-
		AD9	21.674	Citronellal	106-23-0			1150	1153			-	-	-	-	-	-	-	11.49±1.39	-	-	-	-	5.97±0.39	-	-
		AD10	24.159	Decanal	112-31-2	823	875	1206	1206	1182	1104	43.92±4.18	32.05±2.24	28.62±3.48	24.43±0.98	-	16.12±1.12	27.73±1.67	48.56±5.25	18.57±1.16	18.75±0.86	25.97±1.19	22.90±1.37	-	13.16±0.47	22.31±0.89
		AD11	24.694	1-Cyclohexene-1-carboxaldehyde, 2,6,6-trimethyl-	432-25-7			1218	1220			-	-	-	12.03±1.59	-	-	-	-	-	-	-	2.90±0.26	-	-	-
		AD12	25.688	(2Z)-3,7-Dimethyl-2,6-octadienal	106-26-3			1241	1240			-	-	-	-	-	-	-	33.58±3.74	-	-	-	-	-	-	-
		AD13	27.038	Citral	5392-40-5			1272	1276			-	-	-	-	-	-	-	60.98±5.59	-	-	-	-	-	-	-
		AD15	27.903	4,8-Decadienal, 5,9-dimethyl-	762-26-5			1292				-	-	-	-	-	-	-	1.54±0.14	-	-	-	-	-	-	-
		AD16	29.956	Undecanal	112-44-7			1338	1307			4.49±0.11	-	0.93±0.11	-	-	-	-	1.99±0.14	-	0.33±0.01	-	-	-	-	-
		AD17	32.5	3,5-Heptadienal, 2-ethylidene-6-methyl-	99172-18-6			1401	1395			-	40.33±3.15	-	-	-	-	-	-	-	-	-	-	-	-	-
	Ketone	KE2	15.402	5-Hepten-2-one, 6-methyl-	110-93-0			991	986			-	-	-	-	-	-	-	-	-	16.07±0.80	-	-	-	-	-
		KE4	19.562	Filifolone	4613-37-0			1102	1108			-	228.44±24.18	-	-	-	-	-	-	-	-	-	-	-	-	-
		KE5	20.524	Chrysanthenone	473-06-3			1123	1123			-	1345.26±48.50	-	-	-	-	-	-	-	-	-	-	-	-	-
		KE6	21.755	Cyclohexanone, 5-methyl-2-(1-methylethyl)-				1151	1169			-	-	-	-	-	-	-	48.33±2.11	-	35.02±1.40	45.50±5.36	-	-	-	-
		KE7	27.249	(4S)-1,8-p-Menthadiene-3-one				1277				-	27.68±0.99	-	-	-	-	-	-	-	-	-	-	-	-	-
		KE8	28.778	trans-β-Ionone	79-77-6			1312	1314			-	-	-	-	-	-	16.74±1.59	-	-	-	-	25.35±1.32	-	-	-
		KE9	29.286	1,4(8)-p-Menthadien-3-one				1324	1340			-	-	-	-	-	-	-	-	-	-	-	-	7.69±0.41	-	-
		KE10	31.765	β-Damascenone	36649-63-5			1383	1386			0.34±0.05	0.99±0.08	0.66±0.11	0.89±0.06	0.73±0.06	0.77±0.10	-	1.95±0.13	0.27±0.02	0.87±0.10	0.74±0.06	2.50±0.23	2.64±0.19	0.33±0.02	0.31±0.04
		KE11	33.397	2-Buten-1-one, 1-(2,6,6-trimethyl-1-cyclohexen-1-yl)-	23696-85-7			1423	1417			-	-	-	-	-	-	1.04±0.13	-	-	-	-	-	-	-	-
		KE12	33.564	α-Ionone	127-41-3			1427	1426			-	-	-	-	-	-	-	-	-	-	-	1.37±0.11	-	-	-
		KE13	33.996	2-Butanone, 4-(2,6,6-trimethyl-1-cyclohexen-1-yl)-				1438	1433			-	-	-	-	-	-	5.01	-	-	-	-	3.40±0.31	-	-	-
		KE14	34.747	α,β-Dihydropseudoionone				1457	1456			-	-	-	4.89±0.05	-	-	-	4.16±0.22	-	-	-	-	-	-	-
		KE15	34.78	5,9-Undecadien-2-one, 6,10-dimethyl-, (Z)-	3879-26-3			1457	1435			0.36±0.04	-	-	-	-	-	-	-	-	-	-	-	-	-	-
		KE16	35.363	2,6-Di-tert-butyl-4-hydroxy-4-methylcyclohexa-2,5-dien-1-one	10396-80-2			1472	1475			-	-	1.51±0.05	1.46±0.07	-	-	1.82±0.16	-	-	-	-	1.68±0.06	11.15±1.10	-	-
		KE17	35.703	2-Pentanone, 4-cyclohexylidene-3,3-diethyl-	313253-65-5			1480	-			-	-	-	3.46±0.33	-	-	-	-	-	-	-	-	-	-	-
		KE18	36.097	Epishyobunone	39020-72-9			1490	1498			-	-	-	-	-	-	-	1.44±0.05	-	-	-	-	-	-	-
		KE20	37.535	Methylionone				1528	1524			-	0.54±0.04	-	-	-	-	-	-	-	-	-	-	-	-	-
	Phenol	PN1	25.326	cis-Carveol				1233	1229			-	-	-	0.37±0.03	-	-	-	-	-	-	-	-	-	-	-
		PN2	27.536	4-Ethyl-2-methoxyphenol	2785-89-9			1283	1282			-	-	-	-	-	-	-	-	-	-	-	-	79.19±11.72	-	-
		PN3	30.922	Eugenol	97-53-0	913	918	1363	1357			-	-	-	-	-	-	-	100.15±6.57	-	-	-	-	-	-	-	1
		PN4	31.322	Phenol, 2-methoxy-3-(2-propenyl)-	1941-12--4	916	902	1373	1377			-	-	-	-	-	-	-	-	-	-	3.60±0.32	-	-	-	-
		PN5	32.873	Methyleugenol	93-15-2	864	879	1410	1402			-	-	-	-	-	-	-	71.01±6.19	-	-	114.33±16.92	-	-	-	-
		PN6	35.379	3,5-Cyclohexadiene-1,2-dione, 3,5-bis(1,1-dimethylethyl)-	3383-21-9			1472				-	-	-	-	1.00±0.09	1.46±0.04	-	-	-	-	-	-	-	-	-
		PN7	37.221	2,5-Di-tert-butylphenol	5875-45-6			1520	1514			1.63±0.22	2.70±0.26	1.25±0.14	1.30±0.10	0.38±0.01	1.06±0.17	0.86±0.05	0.69±0.05	1.32±0.09	0.51±0.03	1.35±0.07	0.71±0.04	2.84±0.10	1.50±0.19	1.27±0.09
	Acid	AC10	42.326	Pterin-6-carboxylic acid	948-60-7			1689				-	-	0.16±0.03	4.38±0.33	-	1.87±0.69	0.67±0.03	1.33±0.10	0.85±0.08	-	-	-	-	0.20±0.02	-
	Alkane	AK1	7.795	Octane	111-65-9			800	800		816	4.09±0.20	1.27±0.09	2.88±0.42	21.53±1.63	9.93±0.52	5.71±0.69	1.98±0.04	4.37±0.23	2.33±0.21	16.41±2.15	2.15±0.12	1.11±0.14	4.99±0.13	3.65±0.15	4.63±0.24
		AK4	15.689	Decane	124-18-5			999	1000			2.55±0.22	-	-	-	-	-	-	-	-	-	-	-	-	-	-
		AK5	19.411	Undecane	1120-21-4			1098	1100			31.25±4.88	28.93±0.76	34.50±1.24	18.86±1.42	22.11±0.22	16.32±2.01	-	41.89±5.45	21.38±2.03	-	21.98±1.66	-	-	14.76±0.90	15.11±0.39
		AK7	28.773	1-Oxaspiro[4.5]dec-6-ene, 2,6,10,10-tetramethyl-	36431-72-8			1312	1302			-	-	-	-	-	-	8.04±0.43	-	-	-	-	26.67±1.39	-	-	-
		AK8	36.449	Pentadecane	629-62-9	885	830	1499	1500	1552	1512	-	21.66±2.83	-	15.48±0.71	26.88±1.17	-	-	-	-	-	-	-	15.04±0.99	-	-	1
		AK9	42.494	Heptadecane	629-78-7	850	816	1700	1700	1761	1711	3.56±0.55	4.79±0.54	4.19±0.36	5.68±0.20	6.27±0.65	4.18±0.42	4.15±0.11	6.81±0.18	4.63±0.44	5.13±0.32	5.75±0.29	5.51±0.33	5.52±0.06	3.34±0.19	6.78±0.38	1
	Ether	ET1	18.649	2H-Pyran, tetrahydro-4-methyl-2-(2-methyl-1-propenyl)-	16409-43-1			1078	1110			3.79±0.29	-	4.40±0.42	12.04±1.56	4.95±0.86	5.03±0.46	6.12±0.55	4.46±0.51	3.60±0.11	-	52.08±3.42	4.17±0.29	-	3.79±0.27	5.21±0.52
		ET2	28.513	Difurfuryl ether	4437-22-3			1306	1299			-	-	-	-	-	-	-	-	-	-	-	-	70.95±7.41	-	-
		ET3	35.369	3-tert-Butyl-4-hydroxyanisole	121-00-6			1472	1497			-	-	-	-	-	-	-	-	0.97±0.04	-	-	-	-	-	-
	Others	OT1	3.659	Lactamide	2043-43-8		732	649				-	-	-	-	-	1.27±0.09	1.58±0.14	-	-	-	1.34±0.12	-	-	-	-
		OT2	3.702	Hydrazinecarboxamide	57-56-7			652				-	-	1.13±0.07	-	1.19±0.14	-	-	-	-	0.74±0.08	-	-	-	-	-
		OT3	3.918	Butylsemithiocarbazide	6610-31-7			669				-	-	-	-	-	-	-	-	-	0.65±0.04	-	-	-	-	-
		OT4	9.757	Chlorobenzene	108-90-7			847	849			13.06±0.91	11.90±0.72	3.98±0.04	3.26±0.48	12.13±0.44	1.69±0.14	2.20±0.09	3.20±0.31	3.19±0.27	7.80±0.47	3.92±0.31	2.34±0.13	20.69±0.41	0.24±0.02	0.75±0.06
		OT5	10.703	p-Xylene	106-42-3			869	865			4.64±0.38	4.71±0.46	4.03±0.34	3.35±0.15	4.97±0.26	3.51±0.35	4.04±0.32	4.16±0.22	4.42±0.49	4.06±0.25	4.06±0.08	3.43±0.21	-	3.77±0.35	3.68±0.29
		OT6	12.685	Oxime-, methoxy-phenyl-				919		1273	1301	197.27±14.22	204.71±15.99	187.43±8.17	196.30±18.93	258.52±15.51	175.46±7.65	172.48±15.52	225.38±11.93	223.40±34.89	194.59±30.39	242.42±14.75	202.81±14.63	375.49±30.74	225.46±35.22	248.38±13.14
		OT7	15.446	Benzene, 1,2,4-trimethyl-	95-63-6			992	990			-	33.57±2.62	-	-	-	-	-	-	-	-	-	-	-	-	-
		OT8	16.537	p-Cymene	99-87-6			1021	1025			1.40±0.19	23.21±1.84	1.18±0.09	-	1.85±0.14	0.84±0.03	-	5.42±0.39	-	11.91±1.21	5.41±0.27	1.09±0.06	-	0.67±0.11	0.60±0.04
		OT9	17.531	h-ser(bzl)-oh				1048				3.37±0.18	-	-	100.54±6.97	41.41±5.79	-	102.30±6.22	15.64±1.66	38.90±4.21	78.75±2.08	83.26 ±9.46	104.29±6.51	-	51.08±4.54	-
		OT10	18.633	2-Ethyl-3,5-dimethylpyrazine	13925-07-0			1077	1084			-	-	-	-	-	-	-	-	-	-	-	-	72.66±5.68	-	-
		OT11	18.855	Furan, 2,2'-methylenebis-	1197-40-6			1083	1088			-	-	-	-	-	-	-	-	-	-	-	-	49.88±5.67	-	-
		OT13	21.064	(+)-Sabinol	471-16-9			1136	1143			-	-	-	-	-	-	-	-	-	-	-	-	5.21±0.36	-	-
		OT14	21.292	Camphor	76-22-2			1141	1145			-	131.00±12.00	-	-	-	-	-	-	-	-	-	-	-	-	-
		OT15	22.306	Borneol	507-70-0	955	939	1164	1167			-	893.84±62.57	-	-	-	-	-	-	-	-	-	-	-	-	-	1
		OT16	23.063	Furan, 2-(2-furanylmethyl)-5-methyl-	13678-51-8			1181	1190			-	-	-	-	-	-	-	-	-	-	-	-	41.11±3.92	-	-
		OT17	23.176	1-Furfurylpyrrole	1438-94-4			1184	1187			-	-	-	-	-	-	-	-	-	-	-	-	131.52±3.48	-	-
		OT18	23.408	3,9-Epoxy-p-mentha-1,8(10)-diene				1189	1199			-	-	1.49±0.17	-	-	-	-	-	-	-	1.75±0.02	-	-	-	-
		OT19	27.6	Dihydroedulan	72746-44-2			1285	1293			-	-	-	-	-	-	-	-	-	2.70±0.07	-	-	-	-	-
		OT23	40.176	Cedrol	77-53-2			1600	1598			11.72±1.02	13.67±0.36	10.44±0.99	14.17±0.86	-	13.92±1.39	11.60±0.95	8.37±0.95	-	13.16±0.99	17.38±1.49	3.55±0.04	7.53±1.04	15.71±2.45	17.31±1.20
		OT24	41.176	Caryophylladienol II	19431-79-9			1643	1637			-	0.64±0.04	-	-	-	-	-	-	-	-	-	-	-	-	-
		OT25	41.629	Neointermedeol	5945-72-2			1662				-	31.49±4.12	-	-	-	-	-	-	-	-	-	-	-	-	-
