# Supplementary material for: Aroma-Enhancing Strategies in Mead: A Metabolomics- and Machine Learning-Guided Additive Approach
Source: Research Square preprint supplement (doi:10.21203/rs.3.rs-7189594/v1), 2025-07-29
Supplement: Supplementary file 5 [file cb2ceb14b39c18e1da4fc862.xlsx]

## Sheet: Table S6.excel
			Table S7. Omission tests for recombination models
			Code	Odorants omitted	RRh-DM	Significance	RES35-DM	Significance	RAD10-DM	Significance
			AL4	Isoamyl alcohol	13	***	11	**	13	***
			AL6	2,3-Butanediol	13	***	13	***	12	***
			AL26	Phenylethyl alcohol	13	***	10	**	11	**
			ES1	Ethyl acetate	7	-	3	-	0	-
			ES10	Isoamyl acetate	5	-	3	-	2	-
			ES18	Ethyl caproate	1	-	7	-	9	*
			ES26	Ethyl caprylate	9	*	11	**	13	***
			ES30	Ethyl phenylacetate	1	-	13	***	13	***
			ES32	Phenethyl acetate	6	-	-	-	5	-
			ES35	Ethyl nonanoate	3	-	13	***	4	-
			ES39	Ethyl 3-phenylpropionate	2	-	1	-	4	-
			ES47	Ethyl caprate	11	**	11	**	13	***
			ES48	3-Methylbutyl octanoate	2	-	1	-	3	-
			AD5	Benzaldehyde	3	-	8	-	5	-
			AD6	Benzeneacetaldehyde	2	-	1	-	1	-
