# Supplementary material for: Aroma-Enhancing Strategies in Mead: A Metabolomics- and Machine Learning-Guided Additive Approach
Source: Research Square preprint supplement (doi:10.21203/rs.3.rs-7189594/v1), 2025-07-29

Aroma-Enhancing Strategies in Mead: A Metabolomics- and Machine Learning-Guided Additive Approach

Ziwei Liua, Jingyu Zhanga, Duanhao Wangb*, Xuening Tanga, Wenlin Suna, Xian Lia, Haoan Zhao a, Meijing Guoa, Tiantian Zhangh, Wenjie Lia, Di Wange, Wushuang Baia, Yue Caofg, Binglin Liad*, Wei Caoac*

a College of Food Science and Engineering, Northwest University, Xi’an 710069,

China

b College of Biology and Food Engineering, Huanghuai University, Zhumadian, China

c Bee Product Research Center of Shaanxi Province, Xi’an 710065, China

d Cangzhou Academy of Agriculture and Forestry Sciences, Cangzhou 061001, China

e College of Ecology, Lishui University, Lishui 323000, China

f Western BaoDe Technologies Co., Ltd

g National Local Joint Engineering Research Center of Filtration and Separation Technology

h College of Petroleum and Chemical Engineering, Longdong University, Qingyang, Gansu 745000, China

Duanhao Wang

Email: [wangdh1969@163.com](mailto:wangdh1969@163.com)

Binglin Li

Email: libinglin@nwu.edu.cn, ORCID: 0000-0002-6409-0784

Wei Cao
Email: caowei@nwu.edu.cn

**Eq. A The most pleasant acidity.**

The most pleasant acidity was observed when the score was at 5. Thus, the pleasant acidity was used to replace the acidity in the sensory evaluation form.

**Fig. S1**. Effects of yeasts and nitrogen sources on the alcohol content of meads (p < 0.05).


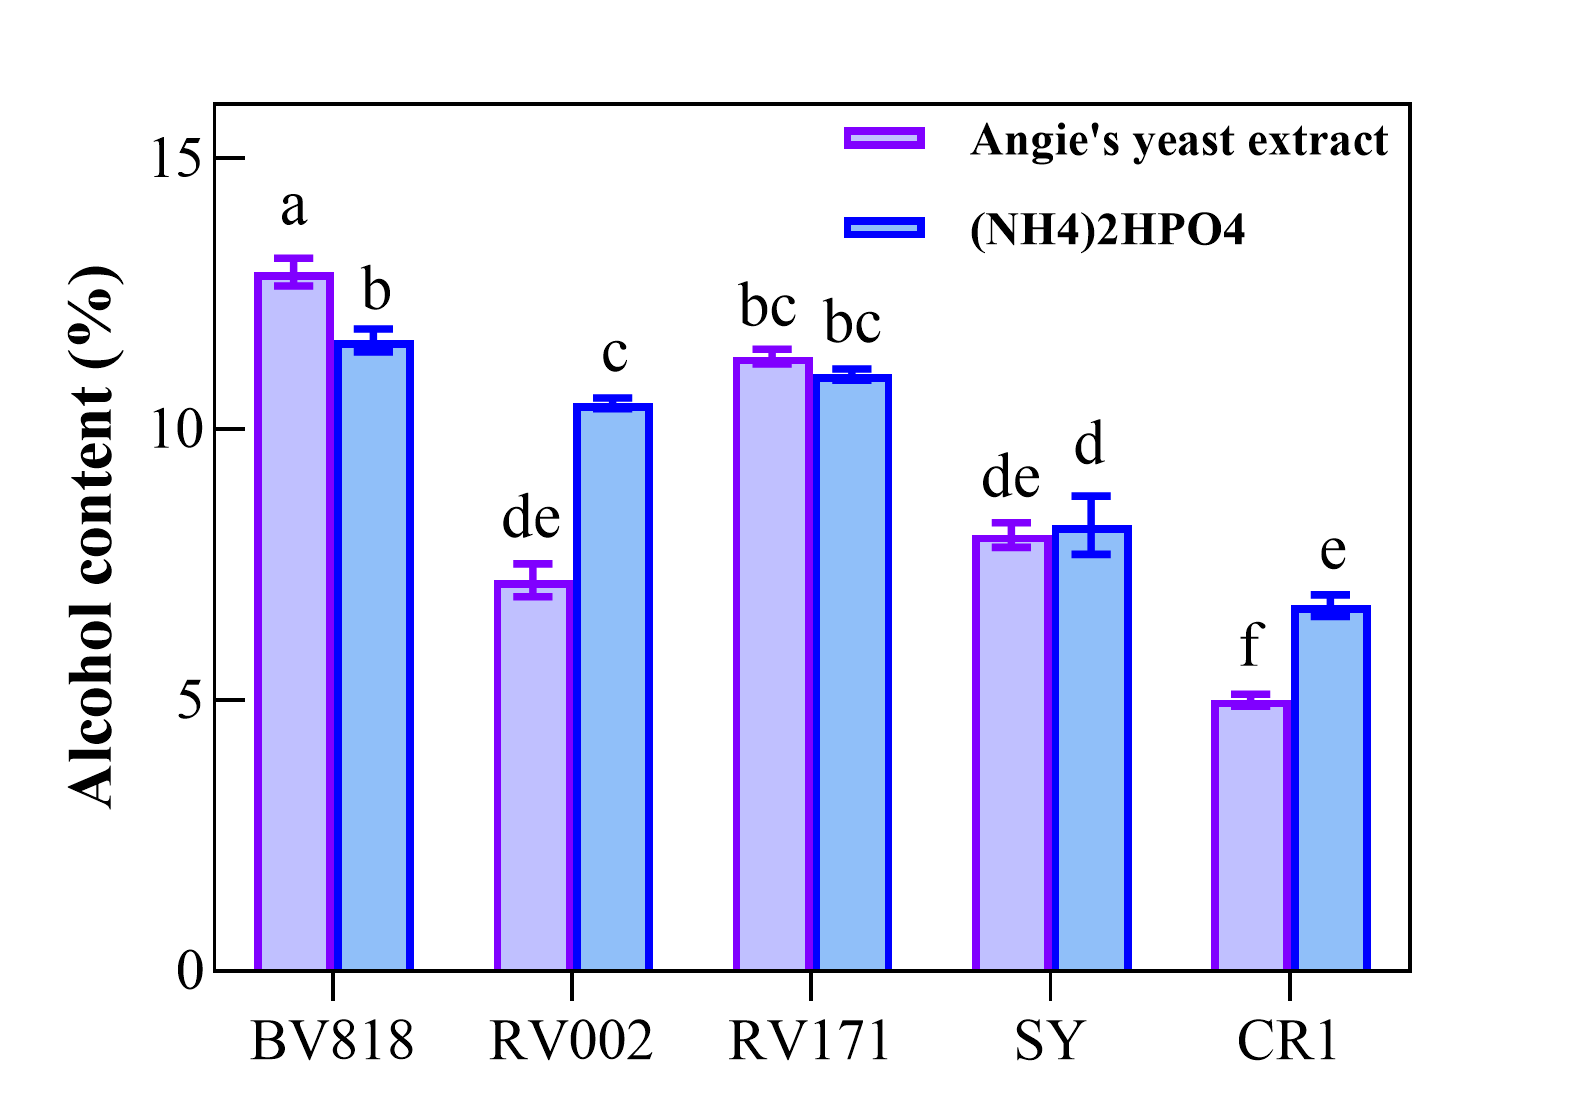


**Fig. S2**. OPLS-DA analysis of 45 samples (including 15 honey solutions, 15 semi-sweet meads and 15 dry meads) (A). Validation plot of 200 permutation tests for the OPLS-DA model; Slope of R2 is greater than 0, and intercept of Q2 on the y-axis (-0.265) is less than 0.05, indicating a valid model. (B). Score plot of OPLS-DA. Green represents honey solutions (HS); blue represents semi-sweet meads (SSM); red represents dry meads (DM).


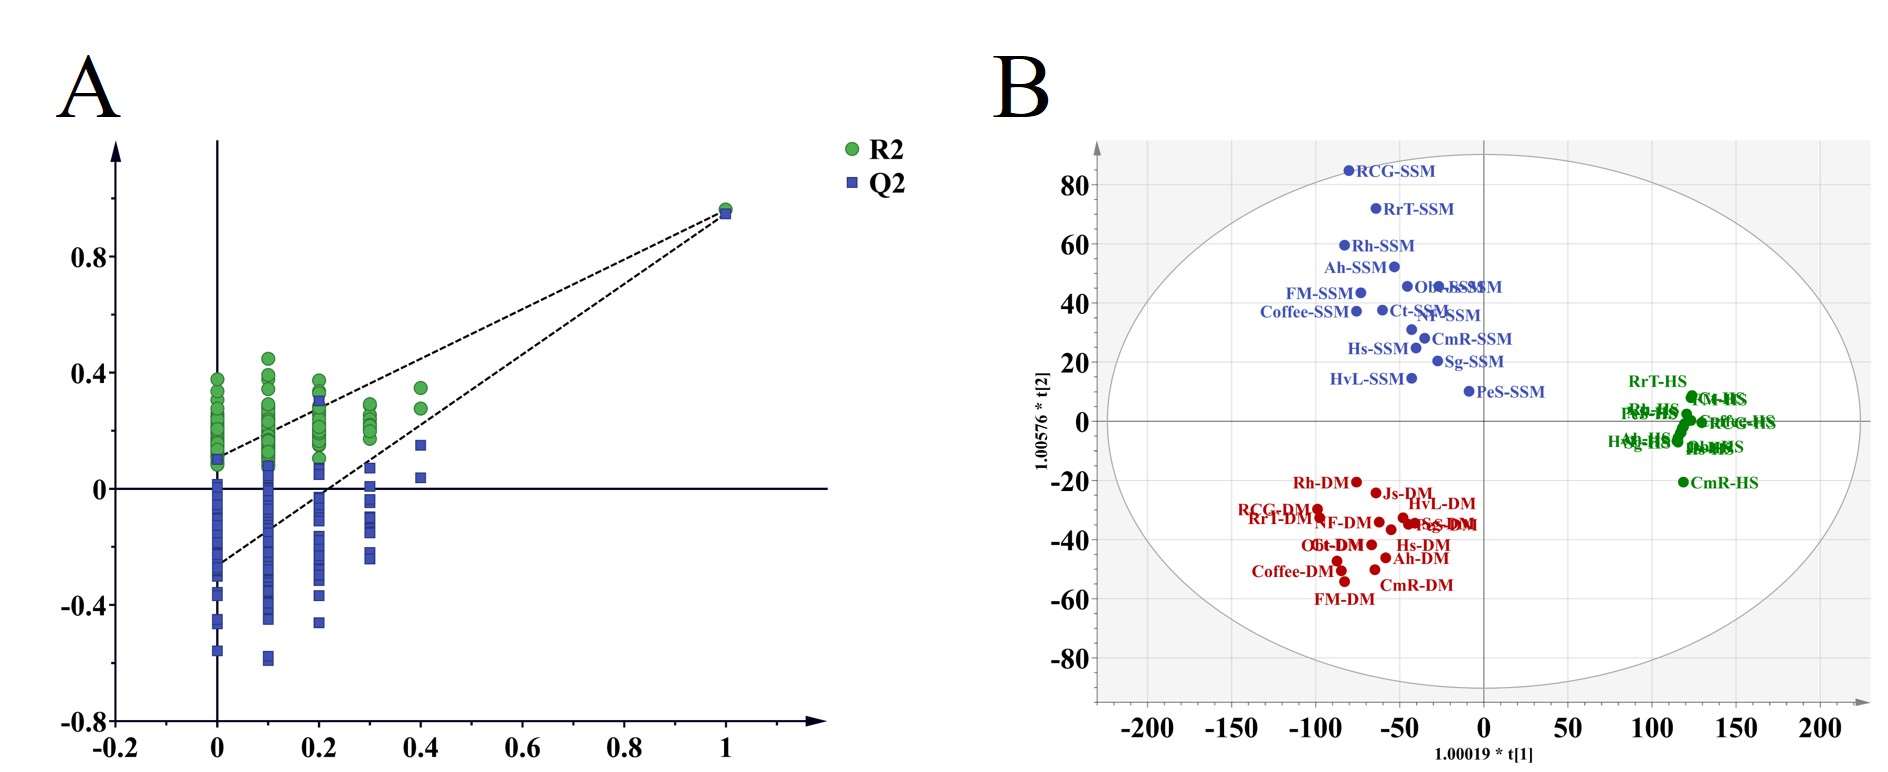


**Fig. S3**. OPLS-DA analysis of 19 meads.


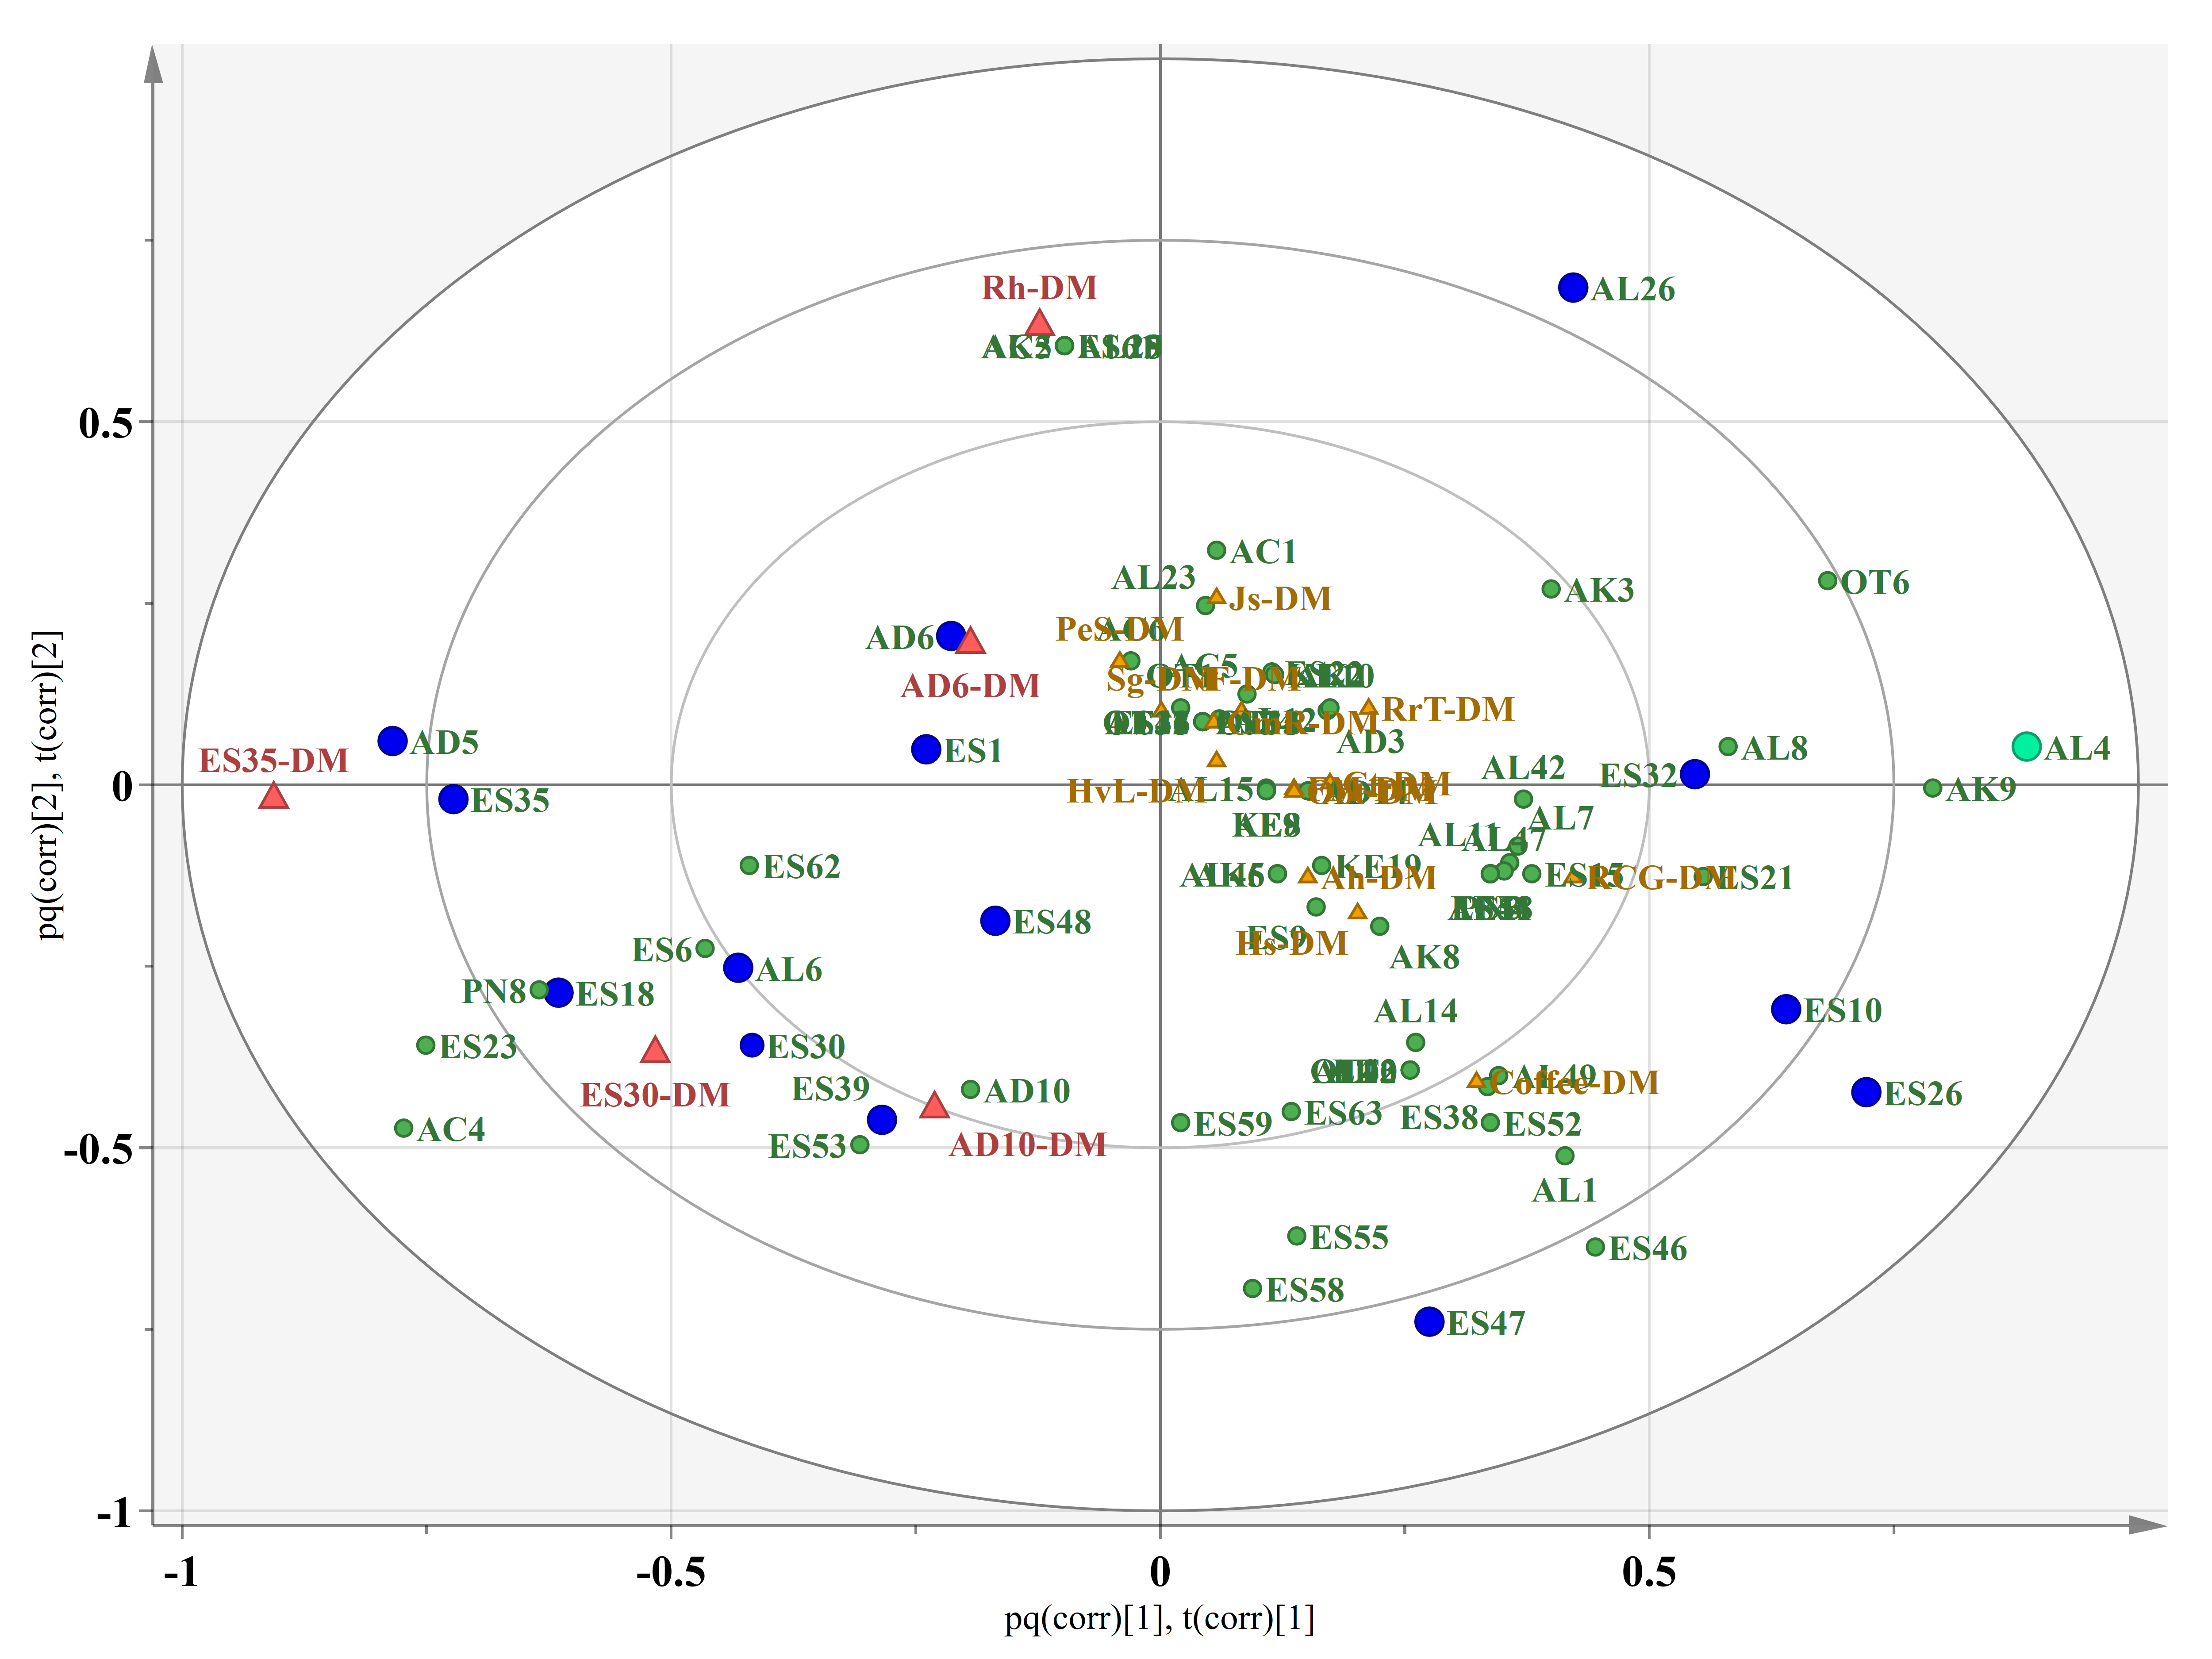

Supplement: Supplementary file 6 [file db65a0b2f73451cc60ec990f.docx]
