# Supplementary material for: Aroma-Enhancing Strategies in Mead: A Metabolomics- and Machine Learning-Guided Additive Approach
Source: Research Square preprint supplement (doi:10.21203/rs.3.rs-7189594/v1), 2025-07-29
Supplement: Supplementary file 7 [file efc2643e798dc1adef6bb047.xlsx]

## Sheet: Sheet1
		Table S4. Abbreviation Comparison Table
		NO.	Abbreviation	Full name	NO.	Abbreviation	Full name
		1	HS-SPME	Headspace Solid-phase Microextraction	35	Hs-HS	Hibiscus sabdariffa honey solution
		2	GC-O-MS	Gaschromatography-olfactometry-mass spectrometry	36	Hs-SSM	Semi-sweet Hibiscus sabdariffa mead
		3	OPLS-DA	Orthogonal Partial Least Squares Discriminant Analysis	37	Hs-DM	Dry Hibiscus sabdariffa mead
		4	HS	Honey solution	38	HvL-HS	Hordeum vulgare L. honey solution
		5	SSM	Semi-sweet mead	39	HvL-SSM	Semi-sweet Hordeum vulgare L. mead
		6	DM	Dry mead	40	HvL-DM	Dry Hordeum vulgare L. mead
		7	Ah	Aurea helianthus	41	Js-HS	Jasminum sambac (L.) honey solution
		8	CmR	Chrysanthemum morifolium	42	Js-SSM	Semi-sweet Jasminum sambac (L.) mead
		9	Ct	Clitoria ternatea	43	Js-DM	Dry Jasminum sambac (L.) mead
		10	FM	Fructus Mori	44	NF-HS	Nelumbinis Folium honey solution
		11	Hs	Hibiscus sabdariffa	45	NF-SSM	Semi-sweet Nelumbinis Folium mead
		12	HvL	Hordeum vulgare (L.)	46	NF-DM	Dry Nelumbinis Folium mead
		13	Js	Jasminum sambac (L.)	47	Obt-HS	Osmanthus black tea honey solution
		14	NF	Nelumbinis Folium	48	Obt-SSM	Semi-sweet Osmanthus black tea mead
		15	Obt	Osmanthus black tea	49	Obt-DM	Dry Osmanthus black tea mead
		16	PeS	Passiflora edulis Sims	50	PeS-HS	Passiflora edulis Sims honey solution
		17	RCG	Rosa Crimson Glory	51	PeS-SSM	Semi-sweet Passiflora edulis Sims mead
		18	RrT	Rosa rugosa Thunb	52	PeS-DM	Dry Passiflora edulis Sims mead
		19	Sg	Siraitia grosvenorii	53	RCG-HS	Rosa Crimson Glory honey solution
		20	Ah-HS	Aurea helianthus honey solution	54	RCG-SSM	Semi-sweet Rosa Crimson Glory mead
		21	Ah-SSM	Semi-sweet Aurea helianthus mead	55	RCG-DM	Dry Rosa Crimson Glory mead
		22	Ah-DM	Dry Aurea helianthus mead	56	Rh-HS	Rape honey solution
		23	CmR-HS	Chrysanthemum morifolium Ramat. honey solution	57	Rh-SSM	Semi-sweet rape mead
		24	CmR-SSM	Semi-sweet Chrysanthemum morifolium Ramat mead	58	Rh-DM	Dry rape mead
		25	CmR-DM	Dry Chrysanthemum morifolium Ramat mead	59	RrT-HS	Rosa rugosa Thunb honey solution
		26	Ct-HS	Clitoria ternatea honey solution	60	RrT-SSM	Semi-sweet Rosa rugosa Thunb mead
		27	Ct-SSM	Semi-sweet Clitoria ternatea mead	61	RrT-DM	Dry Rosa rugosa Thunb mead
		28	Ct-DM	Dry Clitoria ternatea mead	62	Sg-HS	Siraitia grosvenorii honey solution
		29	Coffee-HS	Coffee honey solution	63	Sg-SSM	Semi-sweet Siraitia grosvenorii mead
		30	Coffee-SSM	Semi-sweet Coffee mead	64	Sg-DM	Dry Siraitia grosvenorii mead
		31	Coffee-DM	Dry Coffee mead	65	ES30-DM	Ethyl phenylacetate dry mead
		32	FM-HS	Fructus Mori honey solution	66	ES35-DM	Ethyl nonanoate dry mead
		33	FM-SSM	Semi-sweet Fructus Mori mead	67	AD6-DM	Phenylacetaldehyde dry mead
		34	FM-DM	Dry Fructus Mori mead	68	AD10-DM	Decanal dry mead
