# Supplementary material for: Aroma-Enhancing Strategies in Mead: A Metabolomics- and Machine Learning-Guided Additive Approach
Source: Research Square preprint supplement (doi:10.21203/rs.3.rs-7189594/v1), 2025-07-29
Supplement: Supplementary file 8 [file fd150f88fd019d53a213c439.xlsx]

## Sheet: Table S4.excel 
Table S5. Correlation coefficient
Code	AL1	AL2	AL3	AL4	AL5	AL6	AL7	AL8	AL9	AL10	AL11	AL12	AL13	AL14	AL15	AL16	AL17	AL18	AL19	AL20	AL21	AL22	AL23	AL24	AL25	AL26	AL27	AL28	AL29	AL30	AL31	AL32	AL33	AL34	AL35	AL36	AL37	AL38	AL39	AL40	AL41	AL42	AL43	AL44	AL45	AL46	AL47	AL48	AL49
AL1	1	-0.28848	0.13334	0.93731	-0.20186	0.53871	0.27195	0.40034	-0.20186	0.16633	0.3436	-0.21377	-0.20186	0.26809	0.18712	-0.01868	-0.17205	-0.15789	-0.93143	0.14058	-0.12642	-0.20186	0.07198	0.24025	-0.15573	-0.71757	0.1154	0.09703	0.09703	0.1154	-0.05192	0.18926	0.07876	0.08537	0.09691	0.1154	0.11622	0.13993	0.22814	0.18926	0.07417	0.07765	0.12166	0.09703	0.1642	0.20713	-0.60975	-0.20186	-0.19193
AL2	-0.28848	1	-0.04518	-0.29084	-0.03248	-0.18318	-0.04181	-0.18042	-0.03248	-0.05685	-0.06749	-0.05625	-0.03248	-0.06023	-0.03248	-0.03248	0.64559	-0.04467	0.25783	-0.04643	0.61387	-0.03248	-0.07629	-0.05443	-0.04394	0.13836	-0.03248	-0.03248	-0.03248	-0.03248	0.43064	-0.03248	0.09722	-0.03248	-0.03248	-0.03248	-0.04132	-0.03248	-0.03248	-0.03248	-0.03248	-0.05102	-0.03248	-0.03248	-0.04565	-0.04072	0.15292	-0.03248	-0.04586
AL3	0.13334	-0.04518	1	0.25576	-0.03161	0.21987	-0.04069	0.25804	-0.03161	0.56891	-0.0657	-0.05476	-0.03161	-0.02989	-0.03161	-0.03161	-0.03992	-0.04348	-0.14339	-0.0452	0.12523	-0.03161	-0.07426	-0.05298	-0.04277	0.0639	-0.03161	-0.03161	-0.03161	-0.03161	-0.04518	-0.03161	-0.0395	-0.03161	-0.03161	-0.03161	-0.04022	-0.03161	-0.03161	-0.03161	-0.03161	0.03702	-0.03161	-0.03161	-0.04444	-0.03964	-0.10074	-0.03161	-0.01992
AL4	0.93731	-0.29084	0.25576	1	-0.20666	0.59855	0.16702	0.58873	-0.20463	0.30512	0.17386	-0.239	-0.20463	0.22856	0.0401	0.02315	-0.16894	-0.19672	-0.93596	0.21657	-0.07955	-0.20517	-0.00163	0.14603	-0.15937	-0.57368	0.07576	0.07303	0.07303	0.07576	-0.08135	0.18285	0.04251	0.05057	0.0713	0.07576	0.10598	0.11136	0.12453	0.18285	0.11435	0.07074	0.18511	0.07303	0.14867	0.19087	-0.58013	-0.20653	-0.1816
AL5	-0.20186	-0.03248	-0.03161	-0.20666	1	-0.12818	-0.02925	-0.08326	-0.02273	-0.03978	-0.04723	-0.03936	-0.02273	-0.04215	-0.02273	-0.02273	-0.0287	-0.03126	0.14305	-0.03249	-0.04307	-0.02273	-0.05338	-0.03809	-0.03075	-0.18171	-0.02273	-0.02273	-0.02273	-0.02273	-0.03248	-0.02273	-0.0284	-0.02273	-0.02273	-0.02273	-0.02892	-0.02273	-0.02273	-0.02273	-0.02273	-0.0357	-0.02273	-0.02273	-0.03194	-0.02849	-0.09937	-0.02273	-0.03209
AL6	0.53871	-0.18318	0.21987	0.59855	-0.12818	1	0.00803	0.31731	-0.12818	0.41103	0.10231	-0.17561	-0.12818	0.29208	-0.01491	-0.04916	-0.1303	-0.04437	-0.57054	0.05863	-0.05034	-0.12818	-0.07758	0.14731	0.15144	-0.07072	0.1514	-0.05361	-0.05361	0.1514	0.02528	-0.08356	0.12271	0.02294	-0.01624	0.1514	-0.05594	-0.01896	0.03048	-0.08356	-0.01486	-0.05696	0.2854	-0.05361	0.27606	-0.07386	-0.31927	-0.12818	-0.06405
AL7	0.27195	-0.04181	-0.04069	0.16702	-0.02925	0.00803	1	0.00882	-0.02925	-0.0512	0.2933	-0.05067	-0.02925	-0.05425	-0.02925	-0.02925	-0.03483	-0.04023	-0.14311	-0.04182	-0.05326	-0.02925	-0.01515	-0.04903	-0.03958	-0.22924	-0.02925	0.06677	0.06677	-0.02925	-0.04181	0.17549	-0.03583	-0.02925	-0.02925	-0.02925	0.05794	-0.02925	0.97572	0.17549	-0.01858	0.04789	-0.02925	0.06677	-0.04112	0.16061	-0.1279	-0.02925	-0.04131
AL8	0.40034	-0.18042	0.25804	0.58873	-0.08326	0.31731	0.00882	1	-0.12625	0.26284	-0.18094	-0.16964	-0.12625	-0.03683	-0.02203	0.06054	-0.09705	-0.17363	-0.51308	0.48615	-0.0012	-0.12625	-0.18296	-0.10915	-0.1708	-0.07947	-0.03595	-0.05543	-0.05543	-0.03595	-0.1131	-0.0276	-0.05128	-0.11203	-0.03719	-0.03595	-0.01083	-0.1111	0.01848	-0.0276	0.13321	-0.06272	0.23558	-0.05543	0.09808	-0.0591	-0.10903	-0.12625	-0.09376
AL9	-0.20186	-0.03248	-0.03161	-0.20463	-0.02273	-0.12818	-0.02925	-0.12625	1	-0.03978	-0.04723	-0.03936	1	-0.04215	-0.02273	-0.02273	-0.0287	0.86889	0.33137	-0.03249	-0.04307	-0.02273	-0.05338	-0.03809	-0.03075	0.16117	-0.02273	-0.02273	-0.02273	-0.02273	-0.03248	-0.02273	-0.0284	-0.02273	-0.02273	-0.02273	-0.02892	-0.02273	-0.02273	-0.02273	-0.02273	-0.0357	-0.02273	-0.02273	-0.03194	-0.02849	0.45085	-0.02273	-0.03209
AL10	0.16633	-0.05685	0.56891	0.30512	-0.03978	0.41103	-0.0512	0.26284	-0.03978	1	-0.08267	-0.0689	-0.03978	-0.00866	-0.03978	-0.03978	-0.05023	-0.05471	-0.1591	0.32765	0.07675	-0.03978	-0.09344	-0.06667	-0.05382	0.08145	-0.03978	-0.03978	-0.03978	-0.03978	-0.05685	-0.03978	-0.04971	-0.03978	-0.03978	-0.03978	-0.05061	-0.03978	-0.03978	-0.03978	-0.03978	0.06323	-0.03978	-0.03978	0.39717	-0.04988	-0.11808	-0.03978	-0.02744
AL11	0.3436	-0.06749	-0.0657	0.17386	-0.04723	0.10231	0.2933	-0.18094	-0.04723	-0.08267	1	-0.0818	-0.04723	0.59821	-0.04723	-0.04723	-0.05964	0.12439	-0.2189	-0.06752	-0.0895	-0.04723	0.10938	0.32808	-0.06389	-0.30798	-0.04723	-0.04723	-0.04723	-0.04723	-0.0675	-0.04723	-0.05902	0.08147	-0.04723	-0.04723	-0.06009	-0.04723	0.31312	-0.04723	-0.04723	-0.05697	-0.04723	-0.04723	-0.06638	-0.02187	-0.14633	-0.04723	-0.04279
AL12	-0.21377	-0.05625	-0.05476	-0.239	-0.03936	-0.17561	-0.05067	-0.16964	-0.03936	-0.0689	-0.0818	1	-0.03936	-0.073	-0.03936	-0.03936	-0.02852	-0.05414	0.28288	-0.05627	-0.05225	-0.03936	0.00725	-0.06597	-0.05325	0.01709	-0.03936	-0.03936	-0.03936	-0.03936	-0.05626	-0.03936	-0.04919	-0.03936	0.12052	-0.03936	-0.05008	-0.03936	-0.03936	-0.03936	-0.03936	-0.06183	-0.03936	-0.03936	-0.05533	-0.04935	-0.04834	0.84422	0.03695
AL13	-0.20186	-0.03248	-0.03161	-0.20463	-0.02273	-0.12818	-0.02925	-0.12625	1	-0.03978	-0.04723	-0.03936	1	-0.04215	-0.02273	-0.02273	-0.0287	0.86889	0.33137	-0.03249	-0.04307	-0.02273	-0.05338	-0.03809	-0.03075	0.16117	-0.02273	-0.02273	-0.02273	-0.02273	-0.03248	-0.02273	-0.0284	-0.02273	-0.02273	-0.02273	-0.02892	-0.02273	-0.02273	-0.02273	-0.02273	-0.0357	-0.02273	-0.02273	-0.03194	-0.02849	0.45085	-0.02273	-0.03209
AL14	0.26809	-0.06023	-0.02989	0.22856	-0.04215	0.29208	-0.05425	-0.03683	-0.04215	-0.00866	0.59821	-0.073	-0.04215	1	-0.04215	-0.04215	-0.05322	-0.05796	-0.1951	0.03472	-0.0305	-0.04215	-0.099	0.30312	0.0127	-0.09585	-0.04215	-0.04215	-0.04215	-0.04215	-0.06023	-0.04215	-0.05266	-0.04215	-0.04215	-0.04215	-0.05362	-0.04215	-0.04215	-0.04215	-0.04215	-0.03707	-0.04215	-0.04215	-0.05924	-0.05284	-0.1429	-0.04215	-0.0522
AL15	0.18712	-0.03248	-0.03161	0.0401	-0.02273	-0.01491	-0.02925	-0.02203	-0.02273	-0.03978	-0.04723	-0.03936	-0.02273	-0.04215	1	-0.02273	-0.0287	-0.03126	-0.11125	-0.03249	-0.04307	-0.02273	-0.05338	-0.03809	-0.03075	-0.18154	-0.02273	-0.02273	-0.02273	-0.02273	-0.03248	-0.02273	-0.0284	-0.02273	-0.02273	-0.02273	-0.02892	-0.02273	-0.02273	-0.02273	-0.02273	-0.0357	-0.02273	-0.02273	0.55371	-0.02849	-0.09937	-0.02273	-0.03209
AL16	-0.01868	-0.03248	-0.03161	0.02315	-0.02273	-0.04916	-0.02925	0.06054	-0.02273	-0.03978	-0.04723	-0.03936	-0.02273	-0.04215	-0.02273	1	-0.0287	-0.03126	-0.10217	-0.03249	0.03243	-0.02273	-0.05338	-0.03809	-0.03075	-0.02681	-0.02273	-0.02273	-0.02273	-0.02273	-0.03248	-0.02273	-0.0284	-0.02273	-0.02273	-0.02273	-0.02892	-0.02273	-0.02273	-0.02273	-0.02273	-0.0357	-0.02273	-0.02273	-0.03194	-0.02849	-0.09937	-0.02273	-0.0223
AL17	-0.17205	0.64559	-0.03992	-0.16894	-0.0287	-0.1303	-0.03483	-0.09705	-0.0287	-0.05023	-0.05964	-0.02852	-0.0287	-0.05322	-0.0287	-0.0287	1	-0.03947	0.16088	-0.04103	0.96743	-0.0287	-0.06741	-0.0481	-0.03883	0.0023	-0.0287	-0.0287	-0.0287	-0.0287	0.64662	-0.0287	0.17645	-0.0287	-0.0287	-0.0287	0.02734	-0.0287	-0.0287	-0.0287	0.1731	-0.04508	-0.0287	-0.0287	-0.04034	-0.03598	-0.12548	-0.0287	-0.04053
AL18	-0.15789	-0.04467	-0.04348	-0.19672	-0.03126	-0.04437	-0.04023	-0.17363	0.86889	-0.05471	0.12439	-0.05414	0.86889	-0.05796	-0.03126	-0.03126	-0.03947	1	0.25284	-0.04468	-0.05923	-0.03126	-0.07342	-0.05238	-0.04228	0.13816	-0.03126	-0.03126	-0.03126	-0.03126	-0.04467	-0.03126	-0.03906	-0.03126	-0.03126	-0.03126	-0.03977	-0.03126	-0.03126	-0.03126	-0.03126	-0.0491	-0.03126	-0.03126	-0.04393	-0.03919	0.42729	-0.03126	-0.01249
AL19	-0.93143	0.25783	-0.14339	-0.93596	0.14305	-0.57054	-0.14311	-0.51308	0.33137	-0.1591	-0.2189	0.28288	0.33137	-0.1951	-0.11125	-0.10217	0.16088	0.25284	1	-0.10885	0.08785	0.15693	-0.03952	-0.18643	0.13536	0.6618	-0.11125	-0.11125	-0.11125	-0.11125	0.04922	-0.11125	-0.07834	-0.11125	-0.11125	-0.11125	-0.13909	-0.11125	-0.11125	-0.11125	-0.10354	-0.08098	-0.11125	-0.11125	-0.15636	-0.13947	0.62886	0.27082	0.21304
AL20	0.14058	-0.04643	-0.0452	0.21657	-0.03249	0.05863	-0.04182	0.48615	-0.03249	0.32765	-0.06752	-0.05627	-0.03249	0.03472	-0.03249	-0.03249	-0.04103	-0.04468	-0.10885	1	-0.06157	-0.03249	-0.07632	-0.05445	-0.04396	0.1132	-0.03249	-0.03249	-0.03249	-0.03249	-0.04643	-0.03249	-0.0406	-0.03249	-0.03249	-0.03249	-0.04134	-0.03249	-0.03249	-0.03249	-0.03249	0.02769	-0.03249	-0.03249	-0.04567	-0.04074	0.09938	-0.03249	-0.04588
AL21	-0.12642	0.61387	0.12523	-0.07955	-0.04307	-0.05034	-0.05326	-0.0012	-0.04307	0.07675	-0.0895	-0.05225	-0.04307	-0.0305	-0.04307	0.03243	0.96743	-0.05923	0.08785	-0.06157	1	-0.04307	-0.10117	-0.07218	-0.05827	0.00836	-0.04307	-0.04307	-0.04307	-0.04307	0.61487	-0.04307	0.15571	-0.04307	-0.04307	-0.04307	0.01121	-0.04307	-0.04307	-0.04307	0.16552	-0.05503	-0.04307	-0.04307	0.03541	-0.054	-0.15118	-0.04307	-0.05223
AL22	-0.20186	-0.03248	-0.03161	-0.20517	-0.02273	-0.12818	-0.02925	-0.12625	-0.02273	-0.03978	-0.04723	-0.03936	-0.02273	-0.04215	-0.02273	-0.02273	-0.0287	-0.03126	0.15693	-0.03249	-0.04307	1	0.58002	-0.03809	-0.03075	0.14437	-0.02273	-0.02273	-0.02273	-0.02273	-0.03248	-0.02273	-0.0284	-0.02273	-0.02273	-0.02273	-0.02892	-0.02273	-0.02273	-0.02273	-0.02273	-0.0357	-0.02273	-0.02273	-0.03194	-0.02849	0.30415	-0.02273	-0.03209
AL23	0.07198	-0.07629	-0.07426	-0.00163	-0.05338	-0.07758	-0.01515	-0.18296	-0.05338	-0.09344	0.10938	0.00725	-0.05338	-0.099	-0.05338	-0.05338	-0.06741	-0.07342	-0.03952	-0.07632	-0.10117	0.58002	1	-0.08947	-0.07222	-0.16998	-0.05338	-0.05338	-0.05338	-0.05338	-0.07629	0.21416	-0.06671	0.40287	0.13795	-0.05338	-0.06792	-0.05338	-0.05338	0.21416	-0.05338	-0.07911	-0.05338	-0.05338	-0.07503	0.32326	0.05134	0.02741	-0.06692
AL24	0.24025	-0.05443	-0.05298	0.14603	-0.03809	0.14731	-0.04903	-0.10915	-0.03809	-0.06667	0.32808	-0.06597	-0.03809	0.30312	-0.03809	-0.03809	-0.0481	-0.05238	-0.18643	-0.05445	-0.07218	-0.03809	-0.08947	1	-0.05153	-0.30433	0.79792	-0.03809	-0.03809	0.79792	0.56895	-0.03809	0.77531	-0.03809	-0.03809	0.79792	-0.04846	-0.03809	-0.03809	-0.03809	-0.03809	-0.05983	-0.03809	-0.03809	-0.05354	-0.04775	-0.16653	-0.03809	-0.05378
AL25	-0.15573	-0.04394	-0.04277	-0.15937	-0.03075	0.15144	-0.03958	-0.1708	-0.03075	-0.05382	-0.06389	-0.05325	-0.03075	0.0127	-0.03075	-0.03075	-0.03883	-0.04228	0.13536	-0.04396	-0.05827	-0.03075	-0.07222	-0.05153	1	0.3418	-0.03075	-0.03075	-0.03075	-0.03075	-0.04394	-0.03075	-0.03842	-0.03075	-0.03075	-0.03075	-0.03912	-0.03075	-0.03075	-0.03075	-0.03075	-0.04829	-0.03075	-0.03075	-0.04322	-0.03855	0.18004	-0.03075	-0.04109
AL26	-0.71757	0.13836	0.0639	-0.57368	-0.18171	-0.07072	-0.22924	-0.07947	0.16117	0.08145	-0.30798	0.01709	0.16117	-0.09585	-0.18154	-0.02681	0.0023	0.13816	0.6618	0.1132	0.00836	0.14437	-0.16998	-0.30433	0.3418	1	-0.18191	-0.17892	-0.17892	-0.18191	-0.11667	-0.18026	-0.17712	-0.18014	-0.17988	-0.18191	-0.18754	-0.17971	-0.17891	-0.18026	-0.05221	-0.13069	0.00422	-0.17892	-0.10464	-0.22596	0.62997	0.05484	0.38649
AL27	0.1154	-0.03248	-0.03161	0.07576	-0.02273	0.1514	-0.02925	-0.03595	-0.02273	-0.03978	-0.04723	-0.03936	-0.02273	-0.04215	-0.02273	-0.02273	-0.0287	-0.03126	-0.11125	-0.03249	-0.04307	-0.02273	-0.05338	0.79792	-0.03075	-0.18191	1	-0.02273	-0.02273	1	0.73013	-0.02273	0.9783	-0.02273	-0.02273	1	-0.02892	-0.02273	-0.02273	-0.02273	-0.02273	-0.0357	-0.02273	-0.02273	-0.03194	-0.02849	-0.09937	-0.02273	-0.03209
AL28	0.09703	-0.03248	-0.03161	0.07303	-0.02273	-0.05361	0.06677	-0.05543	-0.02273	-0.03978	-0.04723	-0.03936	-0.02273	-0.04215	-0.02273	-0.02273	-0.0287	-0.03126	-0.11125	-0.03249	-0.04307	-0.02273	-0.05338	-0.03809	-0.03075	-0.17892	-0.02273	1	1	-0.02273	-0.03248	-0.02273	-0.0284	-0.02273	-0.02273	-0.02273	0.94864	-0.02273	-0.02273	-0.02273	-0.02273	0.96374	-0.02273	1	-0.03194	-0.02849	-0.09937	-0.02273	-0.03209
AL29	0.09703	-0.03248	-0.03161	0.07303	-0.02273	-0.05361	0.06677	-0.05543	-0.02273	-0.03978	-0.04723	-0.03936	-0.02273	-0.04215	-0.02273	-0.02273	-0.0287	-0.03126	-0.11125	-0.03249	-0.04307	-0.02273	-0.05338	-0.03809	-0.03075	-0.17892	-0.02273	1	1	-0.02273	-0.03248	-0.02273	-0.0284	-0.02273	-0.02273	-0.02273	0.94864	-0.02273	-0.02273	-0.02273	-0.02273	0.96374	-0.02273	1	-0.03194	-0.02849	-0.09937	-0.02273	-0.03209
AL30	0.1154	-0.03248	-0.03161	0.07576	-0.02273	0.1514	-0.02925	-0.03595	-0.02273	-0.03978	-0.04723	-0.03936	-0.02273	-0.04215	-0.02273	-0.02273	-0.0287	-0.03126	-0.11125	-0.03249	-0.04307	-0.02273	-0.05338	0.79792	-0.03075	-0.18191	1	-0.02273	-0.02273	1	0.73013	-0.02273	0.9783	-0.02273	-0.02273	1	-0.02892	-0.02273	-0.02273	-0.02273	-0.02273	-0.0357	-0.02273	-0.02273	-0.03194	-0.02849	-0.09937	-0.02273	-0.03209
AL31	-0.05192	0.43064	-0.04518	-0.08135	-0.03248	0.02528	-0.04181	-0.1131	-0.03248	-0.05685	-0.0675	-0.05626	-0.03248	-0.06023	-0.03248	-0.03248	0.64662	-0.04467	0.04922	-0.04643	0.61487	-0.03248	-0.07629	0.56895	-0.04394	-0.11667	0.73013	-0.03248	-0.03248	0.73013	1	-0.03248	0.84808	-0.03248	-0.03248	0.73013	-0.04132	-0.03248	-0.03248	-0.03248	-0.03248	-0.05102	-0.03248	-0.03248	-0.04565	-0.04072	-0.14201	-0.03248	-0.04587
AL32	0.18926	-0.03248	-0.03161	0.18285	-0.02273	-0.08356	0.17549	-0.0276	-0.02273	-0.03978	-0.04723	-0.03936	-0.02273	-0.04215	-0.02273	-0.02273	-0.0287	-0.03126	-0.11125	-0.03249	-0.04307	-0.02273	0.21416	-0.03809	-0.03075	-0.18026	-0.02273	-0.02273	-0.02273	-0.02273	-0.03248	1	-0.0284	-0.02273	-0.02273	-0.02273	-0.02892	-0.02273	-0.02273	1	-0.02273	-0.0357	-0.02273	-0.02273	-0.03194	0.957	-0.09937	-0.02273	-0.03209
AL33	0.07876	0.09722	-0.0395	0.04251	-0.0284	0.12271	-0.03583	-0.05128	-0.0284	-0.04971	-0.05902	-0.04919	-0.0284	-0.05266	-0.0284	-0.0284	0.17645	-0.03906	-0.07834	-0.0406	0.15571	-0.0284	-0.06671	0.77531	-0.03842	-0.17712	0.9783	-0.0284	-0.0284	0.9783	0.84808	-0.0284	1	-0.0284	-0.0284	0.9783	-0.01419	-0.0284	-0.0284	-0.0284	0.04093	-0.04461	-0.0284	-0.0284	-0.03992	-0.03561	-0.12417	-0.0284	-0.0401
AL34	0.08537	-0.03248	-0.03161	0.05057	-0.02273	0.02294	-0.02925	-0.11203	-0.02273	-0.03978	0.08147	-0.03936	-0.02273	-0.04215	-0.02273	-0.02273	-0.0287	-0.03126	-0.11125	-0.03249	-0.04307	-0.02273	0.40287	-0.03809	-0.03075	-0.18014	-0.02273	-0.02273	-0.02273	-0.02273	-0.03248	-0.02273	-0.0284	1	-0.02273	-0.02273	-0.02892	-0.02273	-0.02273	-0.02273	-0.02273	-0.0357	-0.02273	-0.02273	-0.03194	0.26826	-0.09937	-0.02273	-0.03209
AL35	0.09691	-0.03248	-0.03161	0.0713	-0.02273	-0.01624	-0.02925	-0.03719	-0.02273	-0.03978	-0.04723	0.12052	-0.02273	-0.04215	-0.02273	-0.02273	-0.0287	-0.03126	-0.11125	-0.03249	-0.04307	-0.02273	0.13795	-0.03809	-0.03075	-0.17988	-0.02273	-0.02273	-0.02273	-0.02273	-0.03248	-0.02273	-0.0284	-0.02273	1	-0.02273	-0.02892	-0.02273	-0.02273	-0.02273	-0.02273	-0.0357	-0.02273	-0.02273	-0.03194	-0.02849	-0.09937	-0.02273	-0.03209
AL36	0.1154	-0.03248	-0.03161	0.07576	-0.02273	0.1514	-0.02925	-0.03595	-0.02273	-0.03978	-0.04723	-0.03936	-0.02273	-0.04215	-0.02273	-0.02273	-0.0287	-0.03126	-0.11125	-0.03249	-0.04307	-0.02273	-0.05338	0.79792	-0.03075	-0.18191	1	-0.02273	-0.02273	1	0.73013	-0.02273	0.9783	-0.02273	-0.02273	1	-0.02892	-0.02273	-0.02273	-0.02273	-0.02273	-0.0357	-0.02273	-0.02273	-0.03194	-0.02849	-0.09937	-0.02273	-0.03209
AL37	0.11622	-0.04132	-0.04022	0.10598	-0.02892	-0.05594	0.05794	-0.01083	-0.02892	-0.05061	-0.06009	-0.05008	-0.02892	-0.05362	-0.02892	-0.02892	0.02734	-0.03977	-0.13909	-0.04134	0.01121	-0.02892	-0.06792	-0.04846	-0.03912	-0.18754	-0.02892	0.94864	0.94864	-0.02892	-0.04132	-0.02892	-0.01419	-0.02892	-0.02892	-0.02892	1	-0.02892	-0.02892	-0.02892	0.2947	0.90988	-0.02892	0.94864	-0.04064	-0.03625	-0.12642	-0.02892	-0.04083
AL38	0.13993	-0.03248	-0.03161	0.11136	-0.02273	-0.01896	-0.02925	-0.1111	-0.02273	-0.03978	-0.04723	-0.03936	-0.02273	-0.04215	-0.02273	-0.02273	-0.0287	-0.03126	-0.11125	-0.03249	-0.04307	-0.02273	-0.05338	-0.03809	-0.03075	-0.17971	-0.02273	-0.02273	-0.02273	-0.02273	-0.03248	-0.02273	-0.0284	-0.02273	-0.02273	-0.02273	-0.02892	1	-0.02273	-0.02273	-0.02273	-0.0357	-0.02273	-0.02273	-0.03194	-0.02849	-0.09937	-0.02273	-0.03209
AL39	0.22814	-0.03248	-0.03161	0.12453	-0.02273	0.03048	0.97572	0.01848	-0.02273	-0.03978	0.31312	-0.03936	-0.02273	-0.04215	-0.02273	-0.02273	-0.0287	-0.03126	-0.11125	-0.03249	-0.04307	-0.02273	-0.05338	-0.03809	-0.03075	-0.17891	-0.02273	-0.02273	-0.02273	-0.02273	-0.03248	-0.02273	-0.0284	-0.02273	-0.02273	-0.02273	-0.02892	-0.02273	1	-0.02273	-0.02273	-0.0357	-0.02273	-0.02273	-0.03194	-0.02849	-0.09937	-0.02273	-0.03209
AL40	0.18926	-0.03248	-0.03161	0.18285	-0.02273	-0.08356	0.17549	-0.0276	-0.02273	-0.03978	-0.04723	-0.03936	-0.02273	-0.04215	-0.02273	-0.02273	-0.0287	-0.03126	-0.11125	-0.03249	-0.04307	-0.02273	0.21416	-0.03809	-0.03075	-0.18026	-0.02273	-0.02273	-0.02273	-0.02273	-0.03248	1	-0.0284	-0.02273	-0.02273	-0.02273	-0.02892	-0.02273	-0.02273	1	-0.02273	-0.0357	-0.02273	-0.02273	-0.03194	0.957	-0.09937	-0.02273	-0.03209
AL41	0.07417	-0.03248	-0.03161	0.11435	-0.02273	-0.01486	-0.01858	0.13321	-0.02273	-0.03978	-0.04723	-0.03936	-0.02273	-0.04215	-0.02273	-0.02273	0.1731	-0.03126	-0.10354	-0.03249	0.16552	-0.02273	-0.05338	-0.03809	-0.03075	-0.05221	-0.02273	-0.02273	-0.02273	-0.02273	-0.03248	-0.02273	0.04093	-0.02273	-0.02273	-0.02273	0.2947	-0.02273	-0.02273	-0.02273	1	-0.0357	-0.02273	-0.02273	-0.03194	-0.02849	-0.09937	-0.02273	-0.03209
AL42	0.07765	-0.05102	0.03702	0.07074	-0.0357	-0.05696	0.04789	-0.06272	-0.0357	0.06323	-0.05697	-0.06183	-0.0357	-0.03707	-0.0357	-0.0357	-0.04508	-0.0491	-0.08098	0.02769	-0.05503	-0.0357	-0.07911	-0.05983	-0.04829	-0.13069	-0.0357	0.96374	0.96374	-0.0357	-0.05102	-0.0357	-0.04461	-0.0357	-0.0357	-0.0357	0.90988	-0.0357	-0.0357	-0.0357	-0.0357	1	-0.0357	0.96374	-0.05018	-0.04476	-0.12323	-0.0357	-0.04757
AL43	0.12166	-0.03248	-0.03161	0.18511	-0.02273	0.2854	-0.02925	0.23558	-0.02273	-0.03978	-0.04723	-0.03936	-0.02273	-0.04215	-0.02273	-0.02273	-0.0287	-0.03126	-0.11125	-0.03249	-0.04307	-0.02273	-0.05338	-0.03809	-0.03075	0.00422	-0.02273	-0.02273	-0.02273	-0.02273	-0.03248	-0.02273	-0.0284	-0.02273	-0.02273	-0.02273	-0.02892	-0.02273	-0.02273	-0.02273	-0.02273	-0.0357	1	-0.02273	-0.03194	-0.02849	-0.00625	-0.02273	0.14642
AL44	0.09703	-0.03248	-0.03161	0.07303	-0.02273	-0.05361	0.06677	-0.05543	-0.02273	-0.03978	-0.04723	-0.03936	-0.02273	-0.04215	-0.02273	-0.02273	-0.0287	-0.03126	-0.11125	-0.03249	-0.04307	-0.02273	-0.05338	-0.03809	-0.03075	-0.17892	-0.02273	1	1	-0.02273	-0.03248	-0.02273	-0.0284	-0.02273	-0.02273	-0.02273	0.94864	-0.02273	-0.02273	-0.02273	-0.02273	0.96374	-0.02273	1	-0.03194	-0.02849	-0.09937	-0.02273	-0.03209
AL45	0.1642	-0.04565	-0.04444	0.14867	-0.03194	0.27606	-0.04112	0.09808	-0.03194	0.39717	-0.06638	-0.05533	-0.03194	-0.05924	0.55371	-0.03194	-0.04034	-0.04393	-0.15636	-0.04567	0.03541	-0.03194	-0.07503	-0.05354	-0.04322	-0.10464	-0.03194	-0.03194	-0.03194	-0.03194	-0.04565	-0.03194	-0.03992	-0.03194	-0.03194	-0.03194	-0.04064	-0.03194	-0.03194	-0.03194	-0.03194	-0.05018	-0.03194	-0.03194	1	-0.04005	-0.0522	-0.03194	-0.03216
AL46	0.20713	-0.04072	-0.03964	0.19087	-0.02849	-0.07386	0.16061	-0.0591	-0.02849	-0.04988	-0.02187	-0.04935	-0.02849	-0.05284	-0.02849	-0.02849	-0.03598	-0.03919	-0.13947	-0.04074	-0.054	-0.02849	0.32326	-0.04775	-0.03855	-0.22596	-0.02849	-0.02849	-0.02849	-0.02849	-0.04072	0.957	-0.03561	0.26826	-0.02849	-0.02849	-0.03625	-0.02849	-0.02849	0.957	-0.02849	-0.04476	-0.02849	-0.02849	-0.04005	1	-0.12458	-0.02849	-0.04024
AL47	-0.60975	0.15292	-0.10074	-0.58013	-0.09937	-0.31927	-0.1279	-0.10903	0.45085	-0.11808	-0.14633	-0.04834	0.45085	-0.1429	-0.09937	-0.09937	-0.12548	0.42729	0.62886	0.09938	-0.15118	0.30415	0.05134	-0.16653	0.18004	0.62997	-0.09937	-0.09937	-0.09937	-0.09937	-0.14201	-0.09937	-0.12417	-0.09937	-0.09937	-0.09937	-0.12642	-0.09937	-0.09937	-0.09937	-0.09937	-0.12323	-0.00625	-0.09937	-0.0522	-0.12458	1	-0.09937	0.22592
AL48	-0.20186	-0.03248	-0.03161	-0.20653	-0.02273	-0.12818	-0.02925	-0.12625	-0.02273	-0.03978	-0.04723	0.84422	-0.02273	-0.04215	-0.02273	-0.02273	-0.0287	-0.03126	0.27082	-0.03249	-0.04307	-0.02273	0.02741	-0.03809	-0.03075	0.05484	-0.02273	-0.02273	-0.02273	-0.02273	-0.03248	-0.02273	-0.0284	-0.02273	-0.02273	-0.02273	-0.02892	-0.02273	-0.02273	-0.02273	-0.02273	-0.0357	-0.02273	-0.02273	-0.03194	-0.02849	-0.09937	1	0.07501
AL49	-0.19193	-0.04586	-0.01992	-0.1816	-0.03209	-0.06405	-0.04131	-0.09376	-0.03209	-0.02744	-0.04279	0.03695	-0.03209	-0.0522	-0.03209	-0.0223	-0.04053	-0.01249	0.21304	-0.04588	-0.05223	-0.03209	-0.06692	-0.05378	-0.04109	0.38649	-0.03209	-0.03209	-0.03209	-0.03209	-0.04587	-0.03209	-0.0401	-0.03209	-0.03209	-0.03209	-0.04083	-0.03209	-0.03209	-0.03209	-0.03209	-0.04757	0.14642	-0.03209	-0.03216	-0.04024	0.22592	0.07501	1
AL50	-0.20186	-0.03248	-0.03161	-0.20463	-0.02273	-0.12818	-0.02925	-0.12625	1	-0.03978	-0.04723	-0.03936	1	-0.04215	-0.02273	-0.02273	-0.0287	0.86889	0.33137	-0.03249	-0.04307	-0.02273	-0.05338	-0.03809	-0.03075	0.16117	-0.02273	-0.02273	-0.02273	-0.02273	-0.03248	-0.02273	-0.0284	-0.02273	-0.02273	-0.02273	-0.02892	-0.02273	-0.02273	-0.02273	-0.02273	-0.0357	-0.02273	-0.02273	-0.03194	-0.02849	0.45085	-0.02273	-0.03209
AL51	-0.08189	-0.05289	-0.05148	-0.065	-0.03701	-0.09727	-0.01469	-0.08512	-0.03701	0.15706	-0.07691	-0.0641	-0.03701	-0.01385	-0.03701	-0.03701	-0.04674	-0.0509	0.09909	0.27067	-0.07014	-0.03701	-0.08694	-0.06203	0.74313	0.18279	-0.03701	0.31387	0.31387	-0.03701	-0.05289	-0.03701	-0.04625	-0.03701	-0.03701	-0.03701	0.2883	-0.03701	-0.03701	-0.03701	-0.03701	0.33018	-0.03701	0.31387	-0.05202	-0.0464	0.13106	-0.03701	-0.05226
AL52	0.09703	-0.03248	-0.03161	0.07303	-0.02273	-0.05361	0.06677	-0.05543	-0.02273	-0.03978	-0.04723	-0.03936	-0.02273	-0.04215	-0.02273	-0.02273	-0.0287	-0.03126	-0.11125	-0.03249	-0.04307	-0.02273	-0.05338	-0.03809	-0.03075	-0.17892	-0.02273	1	1	-0.02273	-0.03248	-0.02273	-0.0284	-0.02273	-0.02273	-0.02273	0.94864	-0.02273	-0.02273	-0.02273	-0.02273	0.96374	-0.02273	1	-0.03194	-0.02849	-0.09937	-0.02273	-0.03209
AL53	0.1154	-0.03248	-0.03161	0.07576	-0.02273	0.1514	-0.02925	-0.03595	-0.02273	-0.03978	-0.04723	-0.03936	-0.02273	-0.04215	-0.02273	-0.02273	-0.0287	-0.03126	-0.11125	-0.03249	-0.04307	-0.02273	-0.05338	0.79792	-0.03075	-0.18191	1	-0.02273	-0.02273	1	0.73013	-0.02273	0.9783	-0.02273	-0.02273	1	-0.02892	-0.02273	-0.02273	-0.02273	-0.02273	-0.0357	-0.02273	-0.02273	-0.03194	-0.02849	-0.09937	-0.02273	-0.03209
ES1	-0.51815	0.11839	0.19279	-0.30762	-0.20497	0.07108	-0.21192	0.3032	0.08084	0.06975	-0.27421	-0.05147	0.08084	-0.09018	-0.20497	0.06251	0.1012	0.14435	0.36437	0.00898	0.15952	0.0547	-0.24872	-0.3435	0.2166	0.77158	-0.20497	-0.17074	-0.17074	-0.20497	-0.09128	-0.20497	-0.17394	-0.18318	-0.20497	-0.20497	-0.11637	-0.20497	-0.15916	-0.20497	0.148	-0.16942	0.08553	-0.17074	-0.04058	-0.25066	0.47811	0.031	0.1053
ES2	-0.20186	-0.03248	-0.03161	-0.19883	-0.02273	-0.12818	-0.02925	-0.12625	-0.02273	-0.03978	-0.04723	-0.03936	-0.02273	-0.04215	-0.02273	-0.02273	-0.0287	-0.03126	0.12851	-0.03249	-0.04307	-0.02273	-0.05338	-0.03809	-0.03075	0.15145	-0.02273	-0.02273	-0.02273	-0.02273	-0.03248	-0.02273	-0.0284	-0.02273	-0.02273	-0.02273	-0.02892	-0.02273	-0.02273	-0.02273	-0.02273	-0.0357	-0.02273	-0.02273	-0.03194	-0.02849	0.12362	-0.02273	-0.03209
ES3	0.13872	-0.04646	-0.04523	0.10324	-0.03251	-0.05012	0.02727	-0.06633	-0.03251	-0.05691	-0.06756	0.05733	-0.03251	-0.06029	-0.03251	-0.03251	-0.04105	-0.04471	-0.15914	-0.04648	-0.06161	-0.03251	0.05962	-0.05449	-0.04398	-0.25663	-0.03251	0.70364	0.70364	-0.03251	-0.04646	-0.03251	-0.04063	-0.03251	0.69438	-0.03251	0.66228	-0.03251	-0.03251	-0.03251	-0.03251	0.66832	-0.03251	0.70364	-0.0457	-0.04076	-0.14215	-0.03251	-0.04591
ES4	-0.03037	-0.04601	-0.04479	-0.06523	0.59269	0.04365	-0.04144	-0.07984	-0.0322	-0.05636	-0.06691	-0.05576	-0.0322	-0.05971	-0.0322	-0.0322	-0.04066	-0.04428	-0.00222	-0.04603	-0.06101	-0.0322	-0.07563	0.61956	-0.04356	-0.25758	0.79175	-0.0322	-0.0322	0.79175	0.56838	-0.0322	0.7708	-0.0322	-0.0322	0.79175	-0.04096	-0.0322	-0.0322	-0.0322	-0.0322	-0.05057	-0.0322	-0.0322	-0.04525	-0.04037	-0.14077	-0.0322	-0.04546
ES5	-0.27508	0.6969	-0.04308	-0.2796	-0.03097	-0.17468	-0.03986	-0.17204	-0.03097	-0.05421	-0.06436	-0.05364	-0.03097	-0.05743	-0.03097	-0.03097	-0.03901	-0.04259	0.23866	-0.04428	-0.05869	0.16978	0.05158	-0.0519	-0.0419	0.20907	-0.03097	-0.03097	-0.03097	-0.03097	-0.04426	-0.03097	-0.0387	-0.03097	-0.03097	-0.03097	-0.0394	-0.03097	-0.03097	-0.03097	-0.03097	-0.04865	-0.03097	-0.03097	-0.04353	-0.03883	0.32723	-0.03097	-0.04373
ES6	0.11483	-0.09298	-0.0905	0.044	0.01837	-0.06569	0.04495	-0.07803	-0.06506	-0.11388	0.07819	-0.07913	-0.06506	-0.06763	0.05679	-0.06506	-0.07821	-0.08948	-0.12572	0.03496	-0.11914	-0.06506	0.27207	0.00195	0.23106	-0.23115	0.04218	0.07282	0.07282	0.04218	-0.01302	-0.02947	0.02426	0.86215	-0.06506	0.04218	0.04902	0.15979	0.04548	-0.02947	-0.06506	0.04858	-0.06506	0.07282	-0.02167	0.22176	-0.05901	-0.04055	-0.08931
ES7	0.60103	-0.1426	-0.13881	0.36469	0.06307	-0.0047	0.39708	-0.17973	-0.09979	-0.17467	0.33105	-0.05343	-0.09979	0.0545	0.26366	-0.09979	-0.10568	-0.13724	-0.44795	-0.14266	-0.16767	-0.09979	0.23854	0.33427	-0.135	-0.78542	0.23387	0.00944	0.00944	0.23387	0.10618	0.23188	0.20374	0.10676	0.25572	0.23387	-0.02255	0.17032	0.357	0.23188	-0.09979	0.00658	-0.09979	0.00944	0.06787	0.25442	-0.4363	-0.09979	-0.14091
ES8	0.32113	-0.07523	-0.07323	0.21364	-0.05264	-0.05572	0.44605	-0.05841	-0.05264	-0.09214	0.26188	-0.05919	-0.05264	0.09074	-0.05264	-0.05264	-0.05629	-0.0724	-0.25766	-0.07525	-0.08902	-0.05264	-0.12365	-0.0178	-0.07121	-0.40663	-0.05264	0.48758	0.48758	-0.05264	-0.07523	-0.05264	-0.06578	-0.05264	-0.05264	-0.05264	0.44939	-0.05264	0.41862	-0.05264	-0.05264	0.52462	-0.05264	0.48758	-0.07399	-0.066	-0.23016	-0.05264	-0.07433
ES9	0.31962	-0.08583	-0.08354	0.22469	-0.06006	0.05969	0.15827	-0.12533	-0.06006	-0.10512	0.03717	-0.08973	-0.06006	-0.04958	0.04037	-0.06006	-0.07584	-0.07365	-0.29339	-0.08586	-0.11382	-0.06006	-0.0608	0.49208	-0.08125	-0.46543	0.66506	0.36778	0.36778	0.66506	0.45486	-0.06006	0.63871	0.08155	0.03133	0.66506	0.33254	0.25831	0.1388	-0.06006	-0.06006	0.39144	-0.06006	0.36778	-0.0269	-0.03421	-0.25974	-0.06006	-0.08368
ES10	-0.45904	0.2485	0.0767	-0.31222	-0.14374	-0.12679	-0.172	0.09137	0.12626	0.23085	-0.2038	-0.11538	0.12626	-0.06704	-0.14374	-0.05839	0.13381	0.1604	0.38522	0.2709	0.15725	-0.0045	-0.22224	-0.24089	0.37852	0.59921	-0.14374	-0.14374	-0.14374	-0.14374	-0.01297	-0.14374	-0.11086	-0.14374	-0.14374	-0.14374	-0.12148	-0.14374	-0.13255	-0.14374	0.05027	-0.1053	0.08408	-0.14374	-0.00904	-0.18021	0.49049	-0.04613	-0.09517
ES11	-0.16173	-0.04331	-0.04216	-0.146	-0.03031	-0.11512	-0.03901	0.27819	-0.03031	-0.05305	-0.06298	-0.05249	-0.03031	-0.0562	-0.03031	-0.03031	-0.03827	-0.04168	0.11955	0.2481	-0.05743	-0.03031	-0.07119	-0.05079	-0.041	0.18966	-0.03031	-0.03031	-0.03031	-0.03031	-0.04331	-0.03031	-0.03787	-0.03031	-0.03031	-0.03031	-0.03856	-0.03031	-0.03031	-0.03031	-0.03031	-0.0476	-0.03031	-0.03031	-0.0426	-0.038	0.22819	-0.03031	-0.0428
ES12	-0.20186	-0.03248	-0.03161	-0.20596	-0.02273	-0.12818	-0.02925	-0.12625	-0.02273	-0.03978	-0.04723	-0.03936	-0.02273	-0.04215	-0.02273	-0.02273	-0.0287	-0.03126	0.23338	-0.03249	-0.04307	-0.02273	-0.05338	-0.03809	-0.03075	0.12288	-0.02273	-0.02273	-0.02273	-0.02273	-0.03248	-0.02273	-0.0284	-0.02273	-0.02273	-0.02273	-0.02892	-0.02273	-0.02273	-0.02273	-0.02273	-0.0357	-0.02273	-0.02273	-0.03194	-0.02849	0.102	-0.02273	-0.03209
ES13	0.53174	-0.13683	-0.13319	0.31795	0.11918	-0.00786	0.46054	-0.17045	-0.09575	-0.1676	0.28802	-0.08549	-0.09575	0.02606	0.12906	-0.09575	-0.10576	-0.13168	-0.41524	-0.13688	-0.16548	-0.09575	0.08188	0.35183	-0.12954	-0.75246	0.29952	0.1831	0.1831	0.29952	0.1579	0.0673	0.26943	0.14728	0.11393	0.29952	0.14472	0.2075	0.43848	0.0673	-0.09575	0.18172	-0.09575	0.1831	-0.00585	0.10758	-0.41864	-0.09575	-0.13521
ES14	-0.50166	0.18342	-0.07857	-0.50734	-0.05648	-0.31855	-0.0727	-0.31375	0.43104	-0.09886	-0.11737	0.2742	0.43104	-0.10474	-0.05648	-0.05648	-0.07132	0.35141	0.56131	-0.08074	-0.10703	0.25367	0.09344	-0.09465	0.19875	0.41459	-0.05648	-0.05648	-0.05648	-0.05648	-0.08072	-0.05648	-0.07057	-0.05648	-0.05648	-0.05648	-0.07186	-0.05648	-0.05648	-0.05648	-0.05648	0.03305	-0.05648	-0.05648	-0.07939	-0.07081	0.37595	0.37413	-0.03466
ES15	0.1801	-0.05939	0.10587	0.30235	-0.04156	0.1614	-0.05349	0.23017	-0.04156	0.56299	-0.08636	-0.07198	-0.04156	0.04928	-0.04156	-0.04156	-0.05248	-0.05716	-0.15908	0.59093	0.04427	-0.04156	-0.09762	-0.06965	-0.05622	0.07156	-0.04156	-0.04156	-0.04156	-0.04156	-0.05939	-0.04156	-0.05193	-0.04156	-0.04156	-0.04156	-0.05287	-0.04156	-0.04156	-0.04156	-0.04156	0.02601	-0.04156	-0.04156	0.23895	-0.0521	-0.09292	-0.04156	-0.04846
ES16	0.13993	-0.03248	-0.03161	0.11136	-0.02273	-0.01896	-0.02925	-0.1111	-0.02273	-0.03978	-0.04723	-0.03936	-0.02273	-0.04215	-0.02273	-0.02273	-0.0287	-0.03126	-0.11125	-0.03249	-0.04307	-0.02273	-0.05338	-0.03809	-0.03075	-0.17971	-0.02273	-0.02273	-0.02273	-0.02273	-0.03248	-0.02273	-0.0284	-0.02273	-0.02273	-0.02273	-0.02892	1	-0.02273	-0.02273	-0.02273	-0.0357	-0.02273	-0.02273	-0.03194	-0.02849	-0.09937	-0.02273	-0.03209
ES17	0.15645	-0.04555	-0.04434	0.10721	-0.03188	0.00622	-0.04103	-0.06487	-0.03188	-0.05579	-0.06624	0.03488	-0.03188	-0.05911	-0.03188	-0.03188	-0.04025	-0.04384	-0.15602	-0.04557	-0.06041	-0.03188	0.03293	0.27882	-0.04312	-0.25375	-0.03188	-0.03188	-0.03188	-0.03188	-0.04555	-0.03188	-0.03983	-0.03188	0.54438	-0.03188	-0.04055	-0.03188	-0.03188	-0.03188	-0.03188	-0.05007	-0.03188	-0.03188	-0.0448	-0.03996	-0.13936	-0.03188	-0.04501
ES18	-0.35662	0.20401	-0.0902	-0.37971	-0.06485	-0.24064	-0.08347	-0.25465	-0.06485	-0.09503	-0.0454	0.11925	-0.06485	-0.10489	-0.06485	-0.06485	0.17935	-0.08918	0.30105	-0.07713	0.13705	-0.06485	0.17253	-0.10867	-0.08773	0.1528	-0.06485	-0.06485	-0.06485	-0.06485	0.08883	-0.06485	-0.0286	0.64524	-0.06485	-0.06485	-0.0825	-0.06485	-0.06485	-0.06485	-0.06485	-0.06738	-0.06485	-0.06485	-0.07893	0.12474	0.10948	0.03723	-0.08045
ES19	0.08537	-0.03248	-0.03161	0.05057	-0.02273	0.02294	-0.02925	-0.11203	-0.02273	-0.03978	0.08147	-0.03936	-0.02273	-0.04215	-0.02273	-0.02273	-0.0287	-0.03126	-0.11125	-0.03249	-0.04307	-0.02273	0.40287	-0.03809	-0.03075	-0.18014	-0.02273	-0.02273	-0.02273	-0.02273	-0.03248	-0.02273	-0.0284	1	-0.02273	-0.02273	-0.02892	-0.02273	-0.02273	-0.02273	-0.02273	-0.0357	-0.02273	-0.02273	-0.03194	0.26826	-0.09937	-0.02273	-0.03209
ES20	0.20742	-0.04405	-0.04287	0.05915	-0.03082	-0.00298	-0.03967	-0.07087	-0.03082	-0.05395	-0.00543	-0.05338	-0.03082	-0.05716	0.89031	-0.03082	-0.03892	-0.04239	-0.15086	-0.04406	-0.05841	-0.03082	0.13541	-0.05165	-0.0417	-0.24556	-0.03082	-0.03082	-0.03082	-0.03082	-0.04405	-0.03082	-0.03851	0.435	-0.03082	-0.03082	-0.03921	-0.03082	-0.03082	-0.03082	-0.03082	-0.04841	-0.03082	-0.03082	0.48415	0.09652	-0.13476	-0.03082	-0.04352
ES21	0.25228	-0.10681	0.16458	0.45041	-0.07474	0.50066	-0.09339	0.51482	-0.05055	0.54443	-0.15532	-0.12945	-0.05055	-0.04237	-0.07474	-0.07474	-0.04113	-0.0815	-0.30305	0.27687	0.02474	-0.07474	-0.17556	-0.12526	-0.02119	0.10082	-0.07474	-0.07474	-0.07474	-0.07474	-0.10682	-0.07474	-0.0751	-0.07474	-0.07474	-0.07474	-0.00972	-0.07474	-0.07474	-0.07474	0.19505	-0.03267	0.5248	-0.07474	0.19234	-0.09371	-0.19551	-0.07474	0.01807
ES22	0.027	-0.04372	-0.04256	0.04811	-0.03059	0.09208	-0.03938	0.07819	-0.03059	-0.05355	0.1033	-0.05299	-0.03059	-0.05673	-0.03059	-0.03059	-0.03863	0.17889	-0.11936	-0.04374	-0.05798	-0.03059	-0.01516	-0.05127	-0.04139	0.03992	-0.03059	-0.03059	-0.03059	-0.03059	-0.04372	-0.03059	-0.03823	-0.03059	-0.03059	-0.03059	-0.03892	-0.03059	-0.03059	-0.03059	-0.03059	-0.04805	-0.03059	-0.03059	-0.043	-0.03836	0.05109	-0.03059	-0.01531
ES23	0.49407	-0.12715	-0.12377	0.30606	0.0843	-0.04918	0.42782	-0.16566	-0.08898	-0.15574	0.2764	-0.08242	-0.08898	0.04353	0.10155	-0.08898	-0.10092	-0.12237	-0.39244	-0.1272	-0.15656	-0.08898	0.08204	0.17816	-0.12037	-0.69811	0.10451	0.57762	0.57762	0.10451	0.01711	0.07694	0.07927	0.05596	0.13992	0.10451	0.52395	0.14145	0.36545	0.07694	-0.08898	0.5696	-0.08898	0.57762	-0.01596	0.09038	-0.38902	-0.08898	-0.12564
ES24	0.09903	-0.03248	-0.03161	0.1112	-0.02273	-0.04168	-0.02925	-0.05048	-0.02273	-0.03978	0.08514	-0.03936	-0.02273	0.07934	-0.02273	-0.02273	-0.0287	-0.03126	-0.11125	-0.03249	-0.04307	-0.02273	-0.05338	-0.03809	-0.03075	-0.1647	-0.02273	-0.02273	-0.02273	-0.02273	-0.03248	-0.02273	-0.0284	-0.02273	-0.02273	-0.02273	-0.02892	-0.02273	-0.02273	-0.02273	-0.02273	0.09734	-0.02273	-0.02273	-0.03194	-0.02849	-0.09937	-0.02273	-0.03209
ES25	0.08537	-0.03248	-0.03161	0.05057	-0.02273	0.02294	-0.02925	-0.11203	-0.02273	-0.03978	0.08147	-0.03936	-0.02273	-0.04215	-0.02273	-0.02273	-0.0287	-0.03126	-0.11125	-0.03249	-0.04307	-0.02273	0.40287	-0.03809	-0.03075	-0.18014	-0.02273	-0.02273	-0.02273	-0.02273	-0.03248	-0.02273	-0.0284	1	-0.02273	-0.02273	-0.02892	-0.02273	-0.02273	-0.02273	-0.02273	-0.0357	-0.02273	-0.02273	-0.03194	0.26826	-0.09937	-0.02273	-0.03209
ES26	-0.05836	-0.06605	0.17101	0.17511	-0.14916	0.20748	-0.19199	0.57689	-0.01822	0.35651	-0.15203	-0.15234	-0.01822	0.00466	-0.15527	0.02182	-0.04777	0.12955	-0.07112	0.42159	0.04487	-0.03433	-0.26135	-0.25322	0.0294	0.38788	-0.15046	-0.14818	-0.14818	-0.15046	-0.15789	-0.15546	-0.15079	-0.15415	-0.15132	-0.15046	-0.09257	-0.15256	-0.1512	-0.15546	0.15506	-0.12444	0.22825	-0.14818	0.09392	-0.19453	0.17512	-0.101	-0.08663
ES27	0.13993	-0.03248	-0.03161	0.11136	-0.02273	-0.01896	-0.02925	-0.1111	-0.02273	-0.03978	-0.04723	-0.03936	-0.02273	-0.04215	-0.02273	-0.02273	-0.0287	-0.03126	-0.11125	-0.03249	-0.04307	-0.02273	-0.05338	-0.03809	-0.03075	-0.17971	-0.02273	-0.02273	-0.02273	-0.02273	-0.03248	-0.02273	-0.0284	-0.02273	-0.02273	-0.02273	-0.02892	1	-0.02273	-0.02273	-0.02273	-0.0357	-0.02273	-0.02273	-0.03194	-0.02849	-0.09937	-0.02273	-0.03209
ES28	0.1154	-0.03248	-0.03161	0.07576	-0.02273	0.1514	-0.02925	-0.03595	-0.02273	-0.03978	-0.04723	-0.03936	-0.02273	-0.04215	-0.02273	-0.02273	-0.0287	-0.03126	-0.11125	-0.03249	-0.04307	-0.02273	-0.05338	0.79792	-0.03075	-0.18191	1	-0.02273	-0.02273	1	0.73013	-0.02273	0.9783	-0.02273	-0.02273	1	-0.02892	-0.02273	-0.02273	-0.02273	-0.02273	-0.0357	-0.02273	-0.02273	-0.03194	-0.02849	-0.09937	-0.02273	-0.03209
ES29	0.1154	-0.03248	-0.03161	0.07576	-0.02273	0.1514	-0.02925	-0.03595	-0.02273	-0.03978	-0.04723	-0.03936	-0.02273	-0.04215	-0.02273	-0.02273	-0.0287	-0.03126	-0.11125	-0.03249	-0.04307	-0.02273	-0.05338	0.79792	-0.03075	-0.18191	1	-0.02273	-0.02273	1	0.73013	-0.02273	0.9783	-0.02273	-0.02273	1	-0.02892	-0.02273	-0.02273	-0.02273	-0.02273	-0.0357	-0.02273	-0.02273	-0.03194	-0.02849	-0.09937	-0.02273	-0.03209
ES30	0.52949	-0.13277	-0.0866	0.33549	0.09282	0.02044	0.51353	-0.14015	-0.0929	-0.09375	0.2624	-0.10267	-0.0929	0.000110691	0.11875	-0.0929	-0.10677	-0.12777	-0.40513	-0.09181	-0.15757	-0.0929	0.03449	0.33092	-0.12569	-0.70192	0.32562	0.20998	0.20998	0.32562	0.17931	0.04528	0.29588	0.0211	0.06771	0.32562	0.17131	0.29362	0.4943	0.04528	-0.0929	0.22218	-0.0929	0.20998	-0.000818482	0.04975	-0.40514	-0.0929	-0.12964
ES31	0.1154	-0.03248	-0.03161	0.07576	-0.02273	0.1514	-0.02925	-0.03595	-0.02273	-0.03978	-0.04723	-0.03936	-0.02273	-0.04215	-0.02273	-0.02273	-0.0287	-0.03126	-0.11125	-0.03249	-0.04307	-0.02273	-0.05338	0.79792	-0.03075	-0.18191	1	-0.02273	-0.02273	1	0.73013	-0.02273	0.9783	-0.02273	-0.02273	1	-0.02892	-0.02273	-0.02273	-0.02273	-0.02273	-0.0357	-0.02273	-0.02273	-0.03194	-0.02849	-0.09937	-0.02273	-0.03209
ES32	-0.5943	0.28142	-0.03556	-0.52559	-0.11739	-0.34014	0.04632	-0.1636	0.14808	0.11958	-0.14329	-0.05606	0.14808	-0.12166	-0.15718	-0.09018	0.14013	0.11212	0.61873	0.22614	0.1082	0.10353	-0.13257	-0.27051	0.52912	0.67943	-0.17794	-0.19088	-0.19088	-0.17794	-0.02261	-0.12491	-0.14543	-0.14337	-0.13072	-0.17794	-0.19212	-0.11717	0.09115	-0.12491	-0.03057	-0.11505	-0.04208	-0.19088	-0.11022	-0.16196	0.59672	-0.03716	0.11537
ES33	0.20262	-0.04644	-0.0452	0.10975	-0.0325	-0.04105	-0.04183	-0.05248	-0.0325	-0.05688	0.03005	-0.05628	-0.0325	0.0293	0.6759	-0.0325	-0.04103	-0.04469	-0.15906	-0.04646	-0.06158	-0.0325	-0.07633	-0.05446	-0.04396	-0.24716	-0.0325	-0.0325	-0.0325	-0.0325	-0.04644	-0.0325	-0.04061	-0.0325	-0.0325	-0.0325	-0.04134	-0.0325	-0.0325	-0.0325	-0.0325	0.04703	-0.0325	-0.0325	0.35998	-0.04074	-0.14208	-0.0325	-0.04589
ES34	0.0756	0.10476	-0.03937	0.03858	-0.02831	0.1213	-0.03564	-0.0551	-0.02831	-0.04954	-0.05882	-0.04903	-0.02831	-0.05249	-0.02831	-0.02831	0.18374	-0.03893	-0.07479	-0.04047	0.16277	-0.02831	-0.06649	0.77491	-0.03829	-0.17639	0.9771	-0.02561	-0.02561	0.9771	0.85467	-0.02831	0.99978	-0.02831	-0.02831	0.9771	-0.01711	-0.02831	-0.02831	-0.02831	0.02328	-0.04183	-0.02831	-0.02561	-0.03979	-0.03549	-0.12376	-0.02831	-0.03997
ES35	0.52418	-0.20567	-0.06502	0.36334	0.15507	-0.00471	0.35654	-0.12546	-0.14392	-0.10371	0.2825	-0.11273	-0.14392	0.05382	0.09815	-0.09046	-0.15835	-0.14245	-0.4486	-0.15983	-0.1956	-0.11584	0.11168	0.25987	-0.13177	-0.73298	0.17017	0.66357	0.66357	0.17017	0.02852	0.16573	0.13255	0.04702	0.1205	0.17017	0.60372	0.14274	0.2667	0.16573	-0.09652	0.62798	-0.05064	0.66357	0.0083	0.17334	-0.44571	-0.14392	-0.17352
ES36	-0.14136	0.62635	-0.04358	-0.16085	-0.03133	-0.08392	-0.04033	-0.12961	-0.03133	-0.05484	-0.06511	-0.01692	-0.03133	-0.0581	-0.03133	-0.03133	0.93969	-0.04309	0.13955	-0.04479	0.90476	-0.03133	-0.07359	0.17642	-0.04238	-0.04916	0.24873	-0.03133	-0.03133	0.24873	0.83618	-0.03133	0.43067	-0.03133	-0.03133	0.24873	-0.03986	-0.03133	-0.03133	-0.03133	-0.03133	-0.04921	-0.03133	-0.03133	-0.04404	-0.03928	-0.13698	-0.03133	-0.04424
ES37	-0.15685	0.60237	-0.04195	-0.14052	-0.03016	-0.12452	-0.03453	-0.06318	-0.03016	-0.05279	-0.06267	-0.05223	-0.03016	-0.05592	-0.03016	-0.03016	0.97344	-0.04147	0.13719	-0.04311	0.94194	-0.03016	-0.07084	-0.05054	-0.0408	0.00467	-0.03016	-0.03016	-0.03016	-0.03016	0.60333	-0.03016	0.17692	-0.03016	-0.03016	-0.03016	0.09177	-0.03016	-0.03016	-0.03016	0.38112	-0.04737	-0.03016	-0.03016	-0.04239	-0.03781	-0.13185	-0.03016	-0.04258
ES38	0.15203	-0.03965	-0.0386	0.22887	-0.02775	0.29615	-0.03571	0.25398	-0.02775	0.07914	-0.05766	-0.04806	-0.02775	-0.01991	-0.02775	-0.02775	-0.03504	-0.03816	-0.12311	0.14662	-0.05258	-0.02775	-0.06517	-0.0465	-0.03754	0.02407	-0.02775	-0.02775	-0.02775	-0.02775	-0.03965	-0.02775	-0.03467	-0.02775	-0.02775	-0.02775	-0.0353	-0.02775	-0.02775	-0.02775	-0.02775	-0.01743	0.9693	-0.02775	-0.039	-0.03479	-0.03053	-0.02775	0.13485
ES39	0.28656	0.03104	0.16994	0.31095	-0.06042	0.0904	0.40476	0.20077	-0.0352	-0.01794	0.011	-0.21786	-0.0352	-0.09075	-0.08661	-0.04456	0.0657	-0.06975	-0.2869	-0.18516	0.08987	-0.1003	-0.24145	0.23883	-0.26871	-0.33263	0.41312	0.31925	0.31925	0.41312	0.35961	-0.15533	0.42152	-0.11399	-0.12446	0.41312	0.30504	0.20639	0.41305	-0.15533	-0.00035077	0.33598	0.16937	0.31925	-0.05983	-0.18275	-0.25363	-0.1487	-0.15073
ES40	0.17654	-0.04499	-0.04379	0.11029	-0.03148	0.12363	-0.04052	-0.0253	-0.03148	-0.0551	-0.06542	0.08052	-0.03148	-0.05838	-0.03148	-0.03148	0.00325	-0.04329	-0.15409	-0.045	-0.0143	-0.03148	-0.07394	0.67241	-0.04259	-0.25197	0.85565	-0.03148	-0.03148	0.85565	0.61651	-0.03148	0.83389	-0.03148	-0.03148	0.85565	-0.04005	-0.03148	-0.03148	-0.03148	-0.03148	-0.04945	-0.03148	-0.03148	-0.04425	-0.03947	-0.13764	-0.03148	-0.04445
ES41	0.18712	-0.03248	-0.03161	0.0401	-0.02273	-0.01491	-0.02925	-0.02203	-0.02273	-0.03978	-0.04723	-0.03936	-0.02273	-0.04215	1	-0.02273	-0.0287	-0.03126	-0.11125	-0.03249	-0.04307	-0.02273	-0.05338	-0.03809	-0.03075	-0.18154	-0.02273	-0.02273	-0.02273	-0.02273	-0.03248	-0.02273	-0.0284	-0.02273	-0.02273	-0.02273	-0.02892	-0.02273	-0.02273	-0.02273	-0.02273	-0.0357	-0.02273	-0.02273	0.55371	-0.02849	-0.09937	-0.02273	-0.03209
ES42	0.24577	-0.05151	-0.05014	0.176	-0.03604	-0.02204	-0.01301	-0.14138	-0.03604	-0.06309	0.04655	-0.06243	-0.03604	0.01473	0.07741	-0.03604	-0.04551	-0.04957	-0.17643	-0.05153	-0.06831	-0.03604	0.04243	0.02751	-0.04876	-0.28562	-0.03604	-0.03604	-0.03604	-0.03604	-0.05151	0.13069	-0.04504	-0.02401	-0.03604	-0.03604	-0.04586	0.96609	-0.03604	0.13069	-0.03604	-0.05662	-0.03604	-0.03604	0.0143	0.11897	-0.15759	-0.03604	-0.0509
ES43	0.08537	-0.03248	-0.03161	0.05057	-0.02273	0.02294	-0.02925	-0.11203	-0.02273	-0.03978	0.08147	-0.03936	-0.02273	-0.04215	-0.02273	-0.02273	-0.0287	-0.03126	-0.11125	-0.03249	-0.04307	-0.02273	0.40287	-0.03809	-0.03075	-0.18014	-0.02273	-0.02273	-0.02273	-0.02273	-0.03248	-0.02273	-0.0284	1	-0.02273	-0.02273	-0.02892	-0.02273	-0.02273	-0.02273	-0.02273	-0.0357	-0.02273	-0.02273	-0.03194	0.26826	-0.09937	-0.02273	-0.03209
ES44	0.13589	-0.03248	-0.03161	0.19682	-0.02273	0.07286	-0.02925	0.09889	-0.02273	0.47946	-0.04723	-0.03936	-0.02273	0.08609	-0.02273	-0.02273	-0.0287	-0.03126	-0.0596	0.72489	-0.04307	-0.02273	-0.05338	-0.03809	-0.03075	0.08116	-0.02273	-0.02273	-0.02273	-0.02273	-0.03248	-0.02273	-0.0284	-0.02273	-0.02273	-0.02273	-0.02892	-0.02273	-0.02273	-0.02273	-0.02273	0.07061	-0.02273	-0.02273	-0.03194	-0.02849	-0.09937	-0.02273	-0.03209
ES45	0.08537	-0.03248	-0.03161	0.05057	-0.02273	0.02294	-0.02925	-0.11203	-0.02273	-0.03978	0.08147	-0.03936	-0.02273	-0.04215	-0.02273	-0.02273	-0.0287	-0.03126	-0.11125	-0.03249	-0.04307	-0.02273	0.40287	-0.03809	-0.03075	-0.18014	-0.02273	-0.02273	-0.02273	-0.02273	-0.03248	-0.02273	-0.0284	1	-0.02273	-0.02273	-0.02892	-0.02273	-0.02273	-0.02273	-0.02273	-0.0357	-0.02273	-0.02273	-0.03194	0.26826	-0.09937	-0.02273	-0.03209
ES46	0.05792	-0.05608	0.06615	0.23864	-0.11364	0.29595	-0.14466	0.32048	-0.04227	0.42261	-0.02383	-0.13098	-0.04227	0.00284	-0.11364	-0.00786	-0.11281	0.18769	-0.14644	0.30618	-0.04115	-0.01925	-0.19206	-0.19045	-0.03267	0.22635	-0.11364	-0.11364	-0.11364	-0.11364	-0.16241	-0.11364	-0.13149	-0.11364	-0.11364	-0.11364	-0.09551	-0.11364	-0.11364	-0.11364	0.04144	-0.10062	0.22061	-0.11364	0.22855	-0.14248	0.05965	-0.08404	-0.04728
ES47	0.00243	-0.1052	0.14	0.20967	-0.13073	0.33338	-0.16303	0.41686	-0.04845	0.34281	-0.09214	-0.07882	-0.04845	-0.02526	-0.12934	0.06813	-0.12106	0.12711	-0.11942	0.1217	-0.02633	-0.03582	-0.22942	-0.20841	-0.09682	0.25294	-0.12228	-0.12798	-0.12798	-0.12228	-0.17182	-0.13098	-0.14181	-0.13114	-0.12855	-0.12228	-0.11368	-0.13012	-0.12729	-0.13098	0.02732	-0.12294	0.49614	-0.12798	0.19962	-0.16427	0.0357	-0.08432	-0.0221
ES48	0.0367	-0.05673	-0.05522	0.10911	-0.0397	0.1481	-0.0511	0.49461	-0.0397	-0.06948	-0.08249	-0.06875	-0.0397	-0.07362	-0.0397	-0.0397	-0.05013	-0.05459	-0.05435	0.39228	-0.07523	-0.0397	-0.09324	-0.06653	-0.0537	0.1444	-0.0397	-0.0397	-0.0397	-0.0397	-0.05673	-0.0397	-0.0496	-0.0397	-0.0397	-0.0397	-0.0505	-0.0397	-0.0397	-0.0397	-0.0397	0.01395	0.66752	-0.0397	-0.0558	-0.04977	0.11798	-0.0397	0.06738
ES49	-0.20186	-0.03248	-0.03161	-0.20505	-0.02273	-0.12818	-0.02925	-0.12625	-0.02273	-0.03978	-0.04723	-0.03936	-0.02273	-0.04215	-0.02273	-0.02273	-0.02818	-0.03126	0.22595	-0.03249	-0.04307	-0.02273	-0.05338	-0.03809	-0.03075	0.13013	-0.02273	-0.02273	-0.02273	-0.02273	-0.03248	-0.02273	-0.0284	-0.02273	-0.02273	-0.02273	-0.02892	-0.02273	-0.02273	-0.02273	-0.02273	-0.0357	-0.02273	-0.02273	-0.03194	-0.02849	-0.09937	-0.02273	-0.03209
ES50	0.09703	-0.03248	-0.03161	0.07303	-0.02273	-0.05361	0.06677	-0.05543	-0.02273	-0.03978	-0.04723	-0.03936	-0.02273	-0.04215	-0.02273	-0.02273	-0.0287	-0.03126	-0.11125	-0.03249	-0.04307	-0.02273	-0.05338	-0.03809	-0.03075	-0.17892	-0.02273	1	1	-0.02273	-0.03248	-0.02273	-0.0284	-0.02273	-0.02273	-0.02273	0.94864	-0.02273	-0.02273	-0.02273	-0.02273	0.96374	-0.02273	1	-0.03194	-0.02849	-0.09937	-0.02273	-0.03209
ES51	0.09691	-0.03248	-0.03161	0.0713	-0.02273	-0.01624	-0.02925	-0.03719	-0.02273	-0.03978	-0.04723	0.12052	-0.02273	-0.04215	-0.02273	-0.02273	-0.0287	-0.03126	-0.11125	-0.03249	-0.04307	-0.02273	0.13795	-0.03809	-0.03075	-0.17988	-0.02273	-0.02273	-0.02273	-0.02273	-0.03248	-0.02273	-0.0284	-0.02273	1	-0.02273	-0.02892	-0.02273	-0.02273	-0.02273	-0.02273	-0.0357	-0.02273	-0.02273	-0.03194	-0.02849	-0.09937	-0.02273	-0.03209
ES52	-0.08985	-0.07833	-0.07625	-0.04344	-0.05482	0.22173	-0.07056	0.03651	-0.05482	0.06846	0.01329	-0.09494	-0.05482	-0.10165	-0.05482	-0.05482	-0.06905	0.09305	0.05658	-0.07836	-0.06906	-0.05482	-0.12876	-0.09186	-0.07416	0.18317	-0.05482	-0.05482	-0.05482	-0.05482	-0.07834	-0.05482	-0.06849	-0.05482	-0.05482	-0.05482	-0.06974	-0.05482	-0.05482	-0.05482	-0.05482	-0.00468	0.68768	-0.05482	0.18042	-0.06873	-0.02143	-0.05482	0.07815
ES53	0.04303	-0.03829	-0.03727	0.12174	-0.02679	-0.01636	-0.03448	0.16969	-0.02679	-0.04689	-0.05567	-0.0464	-0.02679	-0.04968	-0.02679	-0.02679	-0.03383	-0.03684	-0.12964	-0.0383	-0.05077	-0.02679	-0.06293	-0.0449	-0.03624	0.0019	-0.02679	-0.02679	-0.02679	-0.02679	-0.03829	-0.02679	-0.03348	-0.02679	-0.02679	-0.02679	-0.03409	-0.02679	-0.02679	-0.02679	-0.02679	-0.04208	-0.02679	-0.02679	-0.03766	-0.03359	-0.11714	-0.02679	-0.03783
ES54	0.18816	-0.03248	-0.03161	0.10514	-0.02273	0.0512	-0.02925	-0.05141	-0.02273	-0.03978	0.21016	-0.03936	-0.02273	-0.04215	-0.02273	-0.02273	-0.0287	-0.03126	-0.11125	-0.03249	-0.04307	-0.02273	0.59391	-0.03809	-0.03075	-0.1797	-0.02273	-0.02273	-0.02273	-0.02273	-0.03248	-0.02273	-0.0284	-0.02273	-0.02273	-0.02273	-0.02892	-0.02273	-0.02273	-0.02273	-0.02273	-0.0357	-0.02273	-0.02273	-0.03194	-0.02849	-0.09937	-0.02273	-0.03209
ES55	-0.00683	-0.09916	0.20006	0.16559	-0.11308	0.29246	-0.13592	0.37431	-0.03952	0.14842	-0.12336	-0.0851	-0.03952	-0.06811	-0.11308	0.08769	-0.12576	0.05288	-0.1007	-0.06459	-0.04985	-0.0588	-0.22081	-0.11495	-0.09924	0.20313	-0.10939	-0.10541	-0.10541	-0.10939	-0.14865	-0.11308	-0.13395	-0.11308	-0.11308	-0.10939	-0.13296	-0.11308	-0.10413	-0.11308	-0.10178	-0.10588	0.72803	-0.10541	0.05242	-0.14178	-0.00273	-0.0426	0.03018
ES56	0.14936	-0.0341	-0.03319	0.12048	-0.02386	-0.02313	-0.02048	-0.11246	-0.02386	-0.04176	-0.04958	-0.04133	-0.02386	-0.04425	-0.02386	-0.02386	-0.03013	-0.03281	-0.11679	-0.03411	-0.04522	-0.02386	-0.04268	-0.03999	-0.03228	-0.18869	-0.02386	-0.02386	-0.02386	-0.02386	-0.0341	0.02723	-0.02981	-0.02386	-0.02386	-0.02386	-0.03036	0.99875	-0.02386	0.02723	-0.02386	-0.03748	-0.02386	-0.02386	-0.03354	0.01932	-0.10432	-0.02386	-0.03369
ES57	-0.45234	0.13752	-0.07084	-0.45729	-0.05093	-0.28724	-0.06555	-0.28042	0.22807	-0.08914	-0.10583	-0.08821	0.22807	-0.09444	-0.05093	-0.05093	0.23881	0.17552	0.49889	-0.07281	0.20166	0.14861	0.01639	-0.08535	0.64153	0.35669	-0.05093	-0.05093	-0.05093	-0.05093	0.13782	-0.05093	-0.0028	-0.05093	-0.05093	-0.05093	-0.06479	-0.05093	-0.05093	-0.05093	-0.05093	-0.06496	-0.05093	-0.05093	-0.07158	-0.06385	0.4566	-0.05093	-0.07192
ES58	-0.15156	-0.14571	0.0988	-0.03065	-0.10196	0.18481	-0.13124	0.19911	-0.10196	0.10284	-0.04352	0.11616	-0.10196	-0.0638	-0.10196	0.09129	-0.12863	0.08273	0.04314	-0.08058	-0.07285	-0.10196	-0.21707	-0.17088	-0.13794	0.27698	-0.10196	-0.10196	-0.10196	-0.10196	-0.14572	-0.10196	-0.12741	-0.10196	-0.10196	-0.10196	-0.12972	-0.10196	-0.10196	-0.10196	-0.10196	-0.0351	0.4887	-0.10196	0.08076	-0.12784	-0.06626	0.13611	0.0279
ES59	0.17936	-0.08462	0.13007	0.30152	-0.11329	0.15273	-0.01796	0.30521	-0.01727	0.19024	-0.14466	-0.12294	-0.01727	-0.05367	-0.09227	-0.02354	-0.11114	0.0121	-0.23523	0.19702	-0.08414	-0.0351	-0.18359	-0.11522	-0.13963	-0.01533	-0.06571	0.74106	0.74106	-0.06571	-0.12644	-0.11329	-0.08424	-0.11329	-0.11329	-0.06571	0.72146	-0.11329	-0.06645	-0.11329	0.0415	0.73192	0.33005	0.74106	-0.06098	-0.14204	-0.11594	-0.08784	-0.05924
ES60	-0.28776	-0.0463	-0.04507	-0.29073	-0.0324	-0.18273	-0.0417	-0.17997	-0.0324	-0.05671	-0.06733	0.52175	-0.0324	-0.06008	-0.0324	-0.0324	-0.04091	-0.04456	0.33006	-0.04632	-0.0614	-0.0324	-0.02326	-0.05429	-0.04383	0.20798	-0.0324	-0.0324	-0.0324	-0.0324	-0.0463	-0.0324	-0.04048	-0.0324	-0.0324	-0.0324	-0.04122	-0.0324	-0.0324	-0.0324	-0.0324	0.09577	-0.0324	-0.0324	-0.04554	-0.04062	-0.14165	0.63647	0.0243
ES61	-0.43385	0.48536	-0.11273	-0.44693	-0.08104	-0.15729	-0.10431	-0.23281	0.29703	-0.14184	-0.11604	-0.00222	0.29703	-0.06039	-0.08104	-0.08104	0.31835	0.2213	0.49287	0.07107	0.26025	0.26699	0.07632	-0.01852	0.01412	0.47408	0.02671	-0.08104	-0.08104	0.02671	0.25682	-0.08104	0.08923	-0.08104	0.01479	0.02671	-0.1031	0.09917	-0.08104	-0.08104	-0.08104	-0.10075	-0.08104	-0.08104	-0.1139	-0.1016	0.59107	0.06151	0.48383
ES62	0.10974	-0.07254	0.07917	0.23982	-0.05076	0.10502	-0.06534	0.44959	-0.05076	-0.08885	-0.10549	-0.08792	-0.05076	-0.07928	-0.05076	-0.05076	-0.0641	-0.06981	-0.23431	-0.07257	0.01636	-0.05076	-0.0808	-0.08507	-0.06867	0.0333	-0.05076	-0.05076	-0.05076	-0.05076	-0.07255	-0.05076	-0.06343	-0.05076	-0.05076	-0.05076	-0.06458	-0.05076	-0.05076	-0.05076	-0.05076	-0.07973	0.29132	-0.05076	-0.07135	-0.06364	-0.03709	-0.05076	-0.00321
ES63	0.21122	-0.12421	0.34761	0.45203	-0.10366	0.3207	-0.13133	0.56285	0.01125	0.33194	-0.18419	-0.15238	0.01125	0.04978	-0.10366	0.02821	-0.09119	-7.59696e-05	-0.29146	0.20964	0.01749	-0.05703	-0.19918	-0.14558	-0.11722	0.14741	-0.10366	-0.10366	-0.10366	-0.10366	-0.14815	-0.10366	-0.1159	-0.10366	-0.10366	-0.10366	-0.06825	-0.10366	-0.10366	-0.10366	0.09743	-0.09212	0.36464	-0.10366	0.04253	-0.12997	-0.12054	-0.10366	-0.04441
ES64	-0.20186	-0.03248	-0.03161	-0.20596	-0.02273	-0.12818	-0.02925	-0.12625	-0.02273	-0.03978	-0.04723	-0.03936	-0.02273	-0.04215	-0.02273	-0.02273	-0.0287	-0.03126	0.23338	-0.03249	-0.04307	-0.02273	-0.05338	-0.03809	-0.03075	0.12288	-0.02273	-0.02273	-0.02273	-0.02273	-0.03248	-0.02273	-0.0284	-0.02273	-0.02273	-0.02273	-0.02892	-0.02273	-0.02273	-0.02273	-0.02273	-0.0357	-0.02273	-0.02273	-0.03194	-0.02849	0.102	-0.02273	-0.03209
AE1	0.3192	-0.07433	-0.07235	0.25335	-0.05201	-0.04498	0.05229	-0.11304	-0.05201	-0.09104	0.11103	0.00229	-0.05201	-0.03708	-0.05201	-0.05201	-0.03626	-0.07153	-0.25459	-0.07436	-0.06754	-0.05201	0.49183	-0.08717	-0.07036	-0.40526	-0.05201	-0.05201	-0.05201	-0.05201	-0.07433	0.5436	-0.06499	0.48673	-0.05201	-0.05201	-0.06617	-0.05201	-0.05201	0.5436	-0.05201	-0.01668	-0.05201	-0.05201	-0.07311	0.66504	-0.22741	-0.05201	-0.07345
AE2	0.46976	-0.13723	-0.13358	0.25135	0.20194	-0.0465	0.24637	-0.18013	-0.09603	-0.16809	0.19614	0.05774	-0.09603	0.01253	0.27002	-0.09603	-0.0926	-0.13207	-0.35907	-0.13728	-0.15176	-0.09603	0.2149	0.32195	-0.12991	-0.73803	0.28606	0.47176	0.47176	0.28606	0.14767	0.24186	0.25611	0.19446	0.21584	0.28606	0.42054	-0.09603	0.15739	0.24186	-0.09603	0.41784	-0.09603	0.47176	0.07464	0.28948	-0.41986	0.0027	-0.12526
AE3	0.18926	-0.03248	-0.03161	0.18285	-0.02273	-0.08356	0.17549	-0.0276	-0.02273	-0.03978	-0.04723	-0.03936	-0.02273	-0.04215	-0.02273	-0.02273	-0.0287	-0.03126	-0.11125	-0.03249	-0.04307	-0.02273	0.21416	-0.03809	-0.03075	-0.18026	-0.02273	-0.02273	-0.02273	-0.02273	-0.03248	1	-0.0284	-0.02273	-0.02273	-0.02273	-0.02892	-0.02273	-0.02273	1	-0.02273	-0.0357	-0.02273	-0.02273	-0.03194	0.957	-0.09937	-0.02273	-0.03209
AE4	0.09703	-0.03248	-0.03161	0.07303	-0.02273	-0.05361	0.06677	-0.05543	-0.02273	-0.03978	-0.04723	-0.03936	-0.02273	-0.04215	-0.02273	-0.02273	-0.0287	-0.03126	-0.11125	-0.03249	-0.04307	-0.02273	-0.05338	-0.03809	-0.03075	-0.17892	-0.02273	1	1	-0.02273	-0.03248	-0.02273	-0.0284	-0.02273	-0.02273	-0.02273	0.94864	-0.02273	-0.02273	-0.02273	-0.02273	0.96374	-0.02273	1	-0.03194	-0.02849	-0.09937	-0.02273	-0.03209
AE5	0.12404	-0.03538	-0.03444	0.08228	-0.02476	0.14617	-0.02308	-0.04095	-0.02476	-0.04334	-0.05145	-0.04288	-0.02476	-0.04591	-0.02476	-0.02476	-0.03126	-0.03405	-0.12119	-0.0354	-0.04692	-0.02476	-0.05816	0.79274	-0.0335	-0.1979	0.99581	0.06883	0.06883	0.99581	0.72561	-0.02476	0.97363	-0.02476	-0.02476	0.99581	0.05796	-0.02476	-0.02476	-0.02476	-0.02476	0.05257	-0.02476	0.06883	-0.0348	-0.03104	-0.10825	-0.02476	-0.03496
AE6	0.27235	-0.08582	-0.08354	0.20275	0.07585	-0.07797	0.18807	-0.14925	-0.06006	-0.10512	0.08036	-0.08916	-0.06006	-0.04245	0.00124	-0.06006	-0.07111	-0.08259	-0.26017	-0.08586	-0.10882	-0.06006	0.20365	-0.03049	-0.08125	-0.46701	-0.06006	0.50032	0.50032	-0.06006	-0.08583	0.23841	-0.07504	0.53763	-0.06006	-0.06006	0.45922	-0.06006	0.09565	0.23841	-0.06006	0.52876	-0.06006	0.50032	-0.04932	0.38573	-0.26258	-0.06006	-0.08481
AE7	0.09703	-0.03248	-0.03161	0.07303	-0.02273	-0.05361	0.06677	-0.05543	-0.02273	-0.03978	-0.04723	-0.03936	-0.02273	-0.04215	-0.02273	-0.02273	-0.0287	-0.03126	-0.11125	-0.03249	-0.04307	-0.02273	-0.05338	-0.03809	-0.03075	-0.17892	-0.02273	1	1	-0.02273	-0.03248	-0.02273	-0.0284	-0.02273	-0.02273	-0.02273	0.94864	-0.02273	-0.02273	-0.02273	-0.02273	0.96374	-0.02273	1	-0.03194	-0.02849	-0.09937	-0.02273	-0.03209
AE8	0.1154	-0.03248	-0.03161	0.07576	-0.02273	0.1514	-0.02925	-0.03595	-0.02273	-0.03978	-0.04723	-0.03936	-0.02273	-0.04215	-0.02273	-0.02273	-0.0287	-0.03126	-0.11125	-0.03249	-0.04307	-0.02273	-0.05338	0.79792	-0.03075	-0.18191	1	-0.02273	-0.02273	1	0.73013	-0.02273	0.9783	-0.02273	-0.02273	1	-0.02892	-0.02273	-0.02273	-0.02273	-0.02273	-0.0357	-0.02273	-0.02273	-0.03194	-0.02849	-0.09937	-0.02273	-0.03209
AE9	0.05247	-0.03248	-0.03161	0.14595	-0.02273	-0.00804	-0.02925	0.08652	-0.02273	-0.03978	-0.04723	-0.03936	-0.02273	-0.04215	-0.02273	-0.02273	-0.0287	-0.03126	-0.08518	-0.03249	-0.04307	-0.02273	-0.05338	-0.03809	-0.03075	-0.00401	-0.02273	-0.02273	-0.02273	-0.02273	-0.03248	-0.02273	-0.0284	-0.02273	-0.02273	-0.02273	-0.02892	-0.02273	-0.02273	-0.02273	-0.02273	-0.0357	-0.02273	-0.02273	-0.03194	-0.02849	-0.09937	-0.02273	-0.03209
AE10	0.18926	-0.03248	-0.03161	0.18285	-0.02273	-0.08356	0.17549	-0.0276	-0.02273	-0.03978	-0.04723	-0.03936	-0.02273	-0.04215	-0.02273	-0.02273	-0.0287	-0.03126	-0.11125	-0.03249	-0.04307	-0.02273	0.21416	-0.03809	-0.03075	-0.18026	-0.02273	-0.02273	-0.02273	-0.02273	-0.03248	1	-0.0284	-0.02273	-0.02273	-0.02273	-0.02892	-0.02273	-0.02273	1	-0.02273	-0.0357	-0.02273	-0.02273	-0.03194	0.957	-0.09937	-0.02273	-0.03209
AE11	-0.20186	-0.03248	-0.03161	-0.20463	-0.02273	-0.12818	-0.02925	-0.12625	1	-0.03978	-0.04723	-0.03936	1	-0.04215	-0.02273	-0.02273	-0.0287	0.86889	0.33137	-0.03249	-0.04307	-0.02273	-0.05338	-0.03809	-0.03075	0.16117	-0.02273	-0.02273	-0.02273	-0.02273	-0.03248	-0.02273	-0.0284	-0.02273	-0.02273	-0.02273	-0.02892	-0.02273	-0.02273	-0.02273	-0.02273	-0.0357	-0.02273	-0.02273	-0.03194	-0.02849	0.45085	-0.02273	-0.03209
AE12	-0.13705	0.56121	-0.04377	-0.11616	-0.03146	-0.11899	-0.03499	-0.04092	-0.03146	-0.05507	-0.06538	-0.05449	-0.03146	-0.05835	-0.03146	-0.03146	0.93811	-0.04327	0.11453	-0.04498	0.90748	-0.03146	-0.0739	-0.05273	-0.04256	-0.00283	-0.03146	-0.03146	-0.03146	-0.03146	0.56211	-0.03146	0.17181	-0.03146	-0.03146	-0.03146	0.12692	-0.03146	-0.03146	-0.03146	0.49614	-0.04942	-0.03146	-0.03146	-0.04422	-0.03945	-0.13756	-0.03146	-0.04443
AE13	0.1154	-0.03248	-0.03161	0.07576	-0.02273	0.1514	-0.02925	-0.03595	-0.02273	-0.03978	-0.04723	-0.03936	-0.02273	-0.04215	-0.02273	-0.02273	-0.0287	-0.03126	-0.11125	-0.03249	-0.04307	-0.02273	-0.05338	0.79792	-0.03075	-0.18191	1	-0.02273	-0.02273	1	0.73013	-0.02273	0.9783	-0.02273	-0.02273	1	-0.02892	-0.02273	-0.02273	-0.02273	-0.02273	-0.0357	-0.02273	-0.02273	-0.03194	-0.02849	-0.09937	-0.02273	-0.03209
AE14	-0.18711	0.65288	-0.03665	-0.18009	-0.02635	-0.12934	-0.0321	-0.10227	-0.02635	-0.04612	-0.05475	-0.04563	-0.02635	-0.04886	-0.02635	-0.02635	0.99635	-0.03623	0.17372	-0.03766	0.96462	-0.02635	-0.06189	-0.04415	-0.03564	0.01859	-0.02635	-0.02635	-0.02635	-0.02635	0.6539	-0.02635	0.17862	-0.02635	-0.02635	-0.02635	0.02147	-0.02635	-0.02635	-0.02635	0.14744	-0.04138	-0.02635	-0.02635	-0.03703	-0.03303	-0.11519	-0.02635	-0.0372
AE15	0.07417	-0.03248	-0.03161	0.11435	-0.02273	-0.01486	-0.01858	0.13321	-0.02273	-0.03978	-0.04723	-0.03936	-0.02273	-0.04215	-0.02273	-0.02273	0.1731	-0.03126	-0.10354	-0.03249	0.16552	-0.02273	-0.05338	-0.03809	-0.03075	-0.05221	-0.02273	-0.02273	-0.02273	-0.02273	-0.03248	-0.02273	0.04093	-0.02273	-0.02273	-0.02273	0.2947	-0.02273	-0.02273	-0.02273	1	-0.0357	-0.02273	-0.02273	-0.03194	-0.02849	-0.09937	-0.02273	-0.03209
AE16	-0.13318	0.55269	-0.04402	-0.1115	-0.03165	-0.11777	-0.03502	-0.03678	-0.03165	-0.05539	-0.06576	-0.05481	-0.03165	-0.05869	-0.03165	-0.03165	0.92998	-0.04352	0.11018	-0.04524	0.89957	-0.03165	-0.07433	-0.05303	-0.04281	-0.00419	-0.03165	-0.03165	-0.03165	-0.03165	0.55357	-0.03165	0.17057	-0.03165	-0.03165	-0.03165	0.13312	-0.03165	-0.03165	-0.03165	0.5163	-0.04971	-0.03165	-0.03165	-0.04448	-0.03968	-0.13836	-0.03165	-0.04469
AE17	0.1154	-0.03248	-0.03161	0.07576	-0.02273	0.1514	-0.02925	-0.03595	-0.02273	-0.03978	-0.04723	-0.03936	-0.02273	-0.04215	-0.02273	-0.02273	-0.0287	-0.03126	-0.11125	-0.03249	-0.04307	-0.02273	-0.05338	0.79792	-0.03075	-0.18191	1	-0.02273	-0.02273	1	0.73013	-0.02273	0.9783	-0.02273	-0.02273	1	-0.02892	-0.02273	-0.02273	-0.02273	-0.02273	-0.0357	-0.02273	-0.02273	-0.03194	-0.02849	-0.09937	-0.02273	-0.03209
AE18	0.0512	-0.04259	-0.04145	0.10778	-0.0298	0.01995	-0.03836	0.04502	-0.0298	0.43344	-0.06193	-0.05161	-0.0298	0.06467	-0.0298	-0.0298	-0.03763	-0.04098	0.01554	0.66572	-0.05647	-0.0298	-0.07	-0.04994	0.30717	0.16768	-0.0298	-0.0298	-0.0298	-0.0298	-0.04259	-0.0298	-0.03724	-0.0298	-0.0298	-0.0298	-0.03791	-0.0298	-0.0298	-0.0298	-0.0298	0.05262	-0.0298	-0.0298	-0.04189	-0.03736	-0.00198	-0.0298	-0.04208
AE19	0.1154	-0.03248	-0.03161	0.07576	-0.02273	0.1514	-0.02925	-0.03595	-0.02273	-0.03978	-0.04723	-0.03936	-0.02273	-0.04215	-0.02273	-0.02273	-0.0287	-0.03126	-0.11125	-0.03249	-0.04307	-0.02273	-0.05338	0.79792	-0.03075	-0.18191	1	-0.02273	-0.02273	1	0.73013	-0.02273	0.9783	-0.02273	-0.02273	1	-0.02892	-0.02273	-0.02273	-0.02273	-0.02273	-0.0357	-0.02273	-0.02273	-0.03194	-0.02849	-0.09937	-0.02273	-0.03209
AD1	0.22342	-0.04548	-0.04427	0.19576	-0.03183	-0.06254	0.0731	-0.10905	-0.03183	-0.05571	-0.06614	-0.05512	-0.03183	-0.05902	-0.03183	-0.03183	-0.04019	-0.04377	-0.15578	-0.0455	-0.06031	-0.03183	0.0743	-0.05333	-0.04305	-0.25195	-0.03183	-0.03183	-0.03183	-0.03183	-0.04548	0.53795	-0.03977	-0.03183	-0.03183	-0.03183	-0.04049	0.83053	-0.03183	0.53795	-0.03183	-0.04999	-0.03183	-0.03183	-0.04473	0.50913	-0.13915	-0.03183	-0.04494
AD2	0.12166	-0.03248	-0.03161	0.18511	-0.02273	0.2854	-0.02925	0.23558	-0.02273	-0.03978	-0.04723	-0.03936	-0.02273	-0.04215	-0.02273	-0.02273	-0.0287	-0.03126	-0.11125	-0.03249	-0.04307	-0.02273	-0.05338	-0.03809	-0.03075	0.00422	-0.02273	-0.02273	-0.02273	-0.02273	-0.03248	-0.02273	-0.0284	-0.02273	-0.02273	-0.02273	-0.02892	-0.02273	-0.02273	-0.02273	-0.02273	-0.0357	1	-0.02273	-0.03194	-0.02849	-0.00625	-0.02273	0.14642
AD3	-0.1619	-0.04189	0.25996	-0.13206	-0.02931	-0.02879	-0.03773	-0.05122	-0.02931	0.19761	-0.06092	-0.05077	-0.02931	-0.05436	-0.02931	-0.02931	-0.03702	-0.04031	0.14606	-0.04191	-0.01177	-0.02931	-0.06885	-0.04913	0.83598	0.25087	-0.02931	-0.02931	-0.02931	-0.02931	-0.04189	-0.02931	-0.03663	-0.02931	-0.02931	-0.02931	-0.03729	-0.02931	-0.02931	-0.02931	-0.02931	-0.01148	-0.02931	-0.02931	-0.0412	-0.03675	0.19516	-0.02931	-0.03153
AD4	0.13993	-0.03248	-0.03161	0.11136	-0.02273	-0.01896	-0.02925	-0.1111	-0.02273	-0.03978	-0.04723	-0.03936	-0.02273	-0.04215	-0.02273	-0.02273	-0.0287	-0.03126	-0.11125	-0.03249	-0.04307	-0.02273	-0.05338	-0.03809	-0.03075	-0.17971	-0.02273	-0.02273	-0.02273	-0.02273	-0.03248	-0.02273	-0.0284	-0.02273	-0.02273	-0.02273	-0.02892	1	-0.02273	-0.02273	-0.02273	-0.0357	-0.02273	-0.02273	-0.03194	-0.02849	-0.09937	-0.02273	-0.03209
AD5	-0.20186	-0.03248	-0.03161	-0.20517	-0.02273	-0.12818	-0.02925	-0.12625	-0.02273	-0.03978	-0.04723	-0.03936	-0.02273	-0.04215	-0.02273	-0.02273	-0.0287	-0.03126	0.15693	-0.03249	-0.04307	1	0.58002	-0.03809	-0.03075	0.14437	-0.02273	-0.02273	-0.02273	-0.02273	-0.03248	-0.02273	-0.0284	-0.02273	-0.02273	-0.02273	-0.02892	-0.02273	-0.02273	-0.02273	-0.02273	-0.0357	-0.02273	-0.02273	-0.03194	-0.02849	0.30415	-0.02273	-0.03209
AD6	0.27612	-0.06783	-0.06602	0.09592	0.03891	-0.01428	-0.03148	-0.04292	-0.04746	-0.08308	-0.09863	-0.04272	-0.04746	-0.08802	0.80047	-0.04746	-0.04736	-0.06527	-0.21084	-0.06785	-0.07669	-0.04746	-0.11149	0.17176	-0.06421	-0.37744	0.25997	0.26789	0.26789	0.25997	0.16141	-0.04746	0.24331	-0.04746	-0.04746	0.25997	0.24104	-0.04746	-0.04746	-0.04746	-0.04746	0.23362	-0.04746	0.26789	0.41885	-0.05951	-0.20752	-0.04746	-0.06702
AD7	0.33544	-0.10709	-0.12169	0.16792	0.2995	-0.12449	0.22575	-0.17899	-0.08748	-0.15312	0.07588	0.00914	-0.08748	-0.13315	0.19351	-0.08748	-0.08035	-0.12031	-0.27006	-0.12506	-0.13404	-0.08748	0.39099	-0.1466	-0.11835	-0.61857	-0.08748	0.27118	0.27118	-0.08748	-0.12502	0.27419	-0.10931	0.48267	0.2816	-0.08748	0.23152	-0.08748	0.1489	0.27419	-0.08748	0.25172	-0.08748	0.27118	0.03795	0.40426	-0.34803	-0.08748	-0.0873
AD8	0.1154	-0.03248	-0.03161	0.07576	-0.02273	0.1514	-0.02925	-0.03595	-0.02273	-0.03978	-0.04723	-0.03936	-0.02273	-0.04215	-0.02273	-0.02273	-0.0287	-0.03126	-0.11125	-0.03249	-0.04307	-0.02273	-0.05338	0.79792	-0.03075	-0.18191	1	-0.02273	-0.02273	1	0.73013	-0.02273	0.9783	-0.02273	-0.02273	1	-0.02892	-0.02273	-0.02273	-0.02273	-0.02273	-0.0357	-0.02273	-0.02273	-0.03194	-0.02849	-0.09937	-0.02273	-0.03209
AD9	0.15204	-0.04421	-0.04303	0.11724	-0.03094	-0.05684	0.0462	-0.10136	-0.03094	-0.05415	-0.06429	-0.05358	-0.03094	-0.05737	-0.03094	-0.03094	-0.03906	-0.04254	-0.15142	-0.04422	-0.05862	-0.03094	-0.07266	-0.05184	-0.04185	-0.2439	-0.03094	0.88516	0.88516	-0.03094	-0.04421	-0.03094	-0.03865	-0.03094	-0.03094	-0.03094	0.83628	0.44505	-0.03094	-0.03094	-0.03094	0.84664	-0.03094	0.88516	-0.04348	-0.03879	-0.13526	-0.03094	-0.04368
AD10	0.35703	-0.12549	-0.12215	0.19336	0.41805	-0.06505	0.20246	-0.17243	-0.08781	-0.15371	0.1542	-0.02402	-0.08781	-0.00978	0.09785	-0.08781	-0.08411	-0.12077	-0.30406	-0.12554	-0.13818	-0.08781	0.19454	0.22602	-0.1188	-0.69254	0.28133	0.47149	0.47149	0.28133	0.14976	0.17594	0.25363	0.23157	0.19357	0.28133	0.42288	-0.08781	0.12607	0.17594	-0.08781	0.44755	-0.08781	0.47149	-0.01711	0.23673	-0.38394	-0.08781	-0.124
AD11	0.13928	-0.03939	-0.03834	0.11275	-0.02756	-0.03555	0.01275	-0.04284	-0.02756	-0.04825	-0.05728	0.1085	-0.02756	-0.05112	-0.02756	-0.02756	-0.03481	-0.03791	-0.13492	-0.0394	-0.05224	-0.02756	0.18525	-0.04619	-0.03729	-0.21824	-0.02756	-0.02756	-0.02756	-0.02756	-0.03939	0.21336	-0.03444	-0.02756	0.97187	-0.02756	-0.03507	-0.02756	-0.02756	0.21336	-0.02756	-0.04329	-0.02756	-0.02756	-0.03874	0.1976	-0.12051	-0.02756	-0.03892
AD12	0.09703	-0.03248	-0.03161	0.07303	-0.02273	-0.05361	0.06677	-0.05543	-0.02273	-0.03978	-0.04723	-0.03936	-0.02273	-0.04215	-0.02273	-0.02273	-0.0287	-0.03126	-0.11125	-0.03249	-0.04307	-0.02273	-0.05338	-0.03809	-0.03075	-0.17892	-0.02273	1	1	-0.02273	-0.03248	-0.02273	-0.0284	-0.02273	-0.02273	-0.02273	0.94864	-0.02273	-0.02273	-0.02273	-0.02273	0.96374	-0.02273	1	-0.03194	-0.02849	-0.09937	-0.02273	-0.03209
AD13	0.09703	-0.03248	-0.03161	0.07303	-0.02273	-0.05361	0.06677	-0.05543	-0.02273	-0.03978	-0.04723	-0.03936	-0.02273	-0.04215	-0.02273	-0.02273	-0.0287	-0.03126	-0.11125	-0.03249	-0.04307	-0.02273	-0.05338	-0.03809	-0.03075	-0.17892	-0.02273	1	1	-0.02273	-0.03248	-0.02273	-0.0284	-0.02273	-0.02273	-0.02273	0.94864	-0.02273	-0.02273	-0.02273	-0.02273	0.96374	-0.02273	1	-0.03194	-0.02849	-0.09937	-0.02273	-0.03209
AD14	-0.11425	0.41049	0.06192	-0.02904	-0.05058	-0.13087	-0.0651	0.28619	-0.05058	-0.08853	-0.1051	-0.0876	-0.05058	-0.08067	-0.05058	-0.05058	-0.06386	-0.06956	0.06516	0.31683	-0.06145	-0.05058	-0.1188	-0.08476	-0.06842	0.28065	-0.05058	-0.05058	-0.05058	-0.05058	-0.07228	-0.05058	-0.0632	-0.05058	-0.05058	-0.05058	-0.06435	-0.05058	-0.05058	-0.05058	-0.05058	-0.07944	-0.05058	-0.05058	-0.07109	-0.06341	0.35674	-0.05058	0.27716
AD15	0.09703	-0.03248	-0.03161	0.07303	-0.02273	-0.05361	0.06677	-0.05543	-0.02273	-0.03978	-0.04723	-0.03936	-0.02273	-0.04215	-0.02273	-0.02273	-0.0287	-0.03126	-0.11125	-0.03249	-0.04307	-0.02273	-0.05338	-0.03809	-0.03075	-0.17892	-0.02273	1	1	-0.02273	-0.03248	-0.02273	-0.0284	-0.02273	-0.02273	-0.02273	0.94864	-0.02273	-0.02273	-0.02273	-0.02273	0.96374	-0.02273	1	-0.03194	-0.02849	-0.09937	-0.02273	-0.03209
AD16	-0.10424	-0.05099	-0.04964	-0.13547	0.89581	-0.13776	-0.00717	-0.09951	-0.03568	-0.06246	-0.05692	-0.01259	-0.03568	-0.06617	-0.03568	-0.03568	-0.02939	-0.04907	0.05695	-0.05101	-0.05109	-0.03568	-0.04049	-0.0598	-0.04827	-0.28407	-0.03568	0.37716	0.37716	-0.03568	-0.051	-0.03568	-0.04459	-0.03568	-0.03568	-0.03568	0.34921	-0.03568	-0.03568	-0.03568	-0.03568	0.34739	-0.03568	0.37716	-0.05015	-0.04474	-0.15601	-0.03568	-0.05039
AD17	0.1154	-0.03248	-0.03161	0.07576	-0.02273	0.1514	-0.02925	-0.03595	-0.02273	-0.03978	-0.04723	-0.03936	-0.02273	-0.04215	-0.02273	-0.02273	-0.0287	-0.03126	-0.11125	-0.03249	-0.04307	-0.02273	-0.05338	0.79792	-0.03075	-0.18191	1	-0.02273	-0.02273	1	0.73013	-0.02273	0.9783	-0.02273	-0.02273	1	-0.02892	-0.02273	-0.02273	-0.02273	-0.02273	-0.0357	-0.02273	-0.02273	-0.03194	-0.02849	-0.09937	-0.02273	-0.03209
KE1	-0.21299	-0.06338	-0.06169	-0.18585	-0.04435	-0.15616	-0.05708	0.25881	-0.04435	-0.07763	-0.09216	0.27441	-0.04435	-0.08224	-0.04435	-0.04435	-0.056	-0.06099	0.19381	0.42728	-0.08405	0.55885	0.30152	-0.07432	-0.06	0.26306	-0.04435	-0.04435	-0.04435	-0.04435	-0.06338	-0.04435	-0.05542	-0.04435	-0.04435	-0.04435	-0.05642	-0.04435	-0.04435	-0.04435	-0.04435	-0.06966	-0.04435	-0.04435	-0.06234	-0.0556	0.37925	0.36218	0.25041
KE2	0.15584	-0.03716	-0.03617	0.073	-0.02601	0.03124	-0.03347	-0.07024	-0.02601	-0.04552	0.20124	-0.04504	-0.02601	-0.04823	-0.02601	-0.02601	-0.03284	-0.03576	-0.08641	-0.03718	-0.04928	0.1299	0.67745	-0.04358	-0.03518	-0.15622	-0.02601	-0.02601	-0.02601	-0.02601	-0.03717	-0.02601	-0.03249	-0.02601	-0.02601	-0.02601	-0.03309	-0.02601	-0.02601	-0.02601	-0.02601	-0.04085	-0.02601	-0.02601	-0.03655	-0.0326	-0.05219	-0.02601	-0.03672
KE3	-0.20186	0.6655	-0.03161	-0.20168	-0.02273	-0.12818	-0.02925	-0.12625	-0.02273	-0.03978	-0.04723	-0.03936	-0.02273	-0.04215	-0.02273	-0.02273	0.97737	-0.03126	0.19338	-0.03249	0.9466	-0.02273	-0.05338	-0.03809	-0.03075	0.02776	-0.02273	-0.02273	-0.02273	-0.02273	0.66654	-0.02273	0.17352	-0.02273	-0.02273	-0.02273	-0.02892	-0.02273	-0.02273	-0.02273	-0.02273	-0.0357	-0.02273	-0.02273	-0.03194	-0.02849	-0.09937	-0.02273	-0.03209
KE4	0.1154	-0.03248	-0.03161	0.07576	-0.02273	0.1514	-0.02925	-0.03595	-0.02273	-0.03978	-0.04723	-0.03936	-0.02273	-0.04215	-0.02273	-0.02273	-0.0287	-0.03126	-0.11125	-0.03249	-0.04307	-0.02273	-0.05338	0.79792	-0.03075	-0.18191	1	-0.02273	-0.02273	1	0.73013	-0.02273	0.9783	-0.02273	-0.02273	1	-0.02892	-0.02273	-0.02273	-0.02273	-0.02273	-0.0357	-0.02273	-0.02273	-0.03194	-0.02849	-0.09937	-0.02273	-0.03209
KE5	0.1154	-0.03248	-0.03161	0.07576	-0.02273	0.1514	-0.02925	-0.03595	-0.02273	-0.03978	-0.04723	-0.03936	-0.02273	-0.04215	-0.02273	-0.02273	-0.0287	-0.03126	-0.11125	-0.03249	-0.04307	-0.02273	-0.05338	0.79792	-0.03075	-0.18191	1	-0.02273	-0.02273	1	0.73013	-0.02273	0.9783	-0.02273	-0.02273	1	-0.02892	-0.02273	-0.02273	-0.02273	-0.02273	-0.0357	-0.02273	-0.02273	-0.03194	-0.02849	-0.09937	-0.02273	-0.03209
KE6	0.21514	-0.05704	-0.05552	0.16725	-0.03991	-0.03672	0.01188	-0.09236	-0.03991	-0.06986	0.122	-0.06913	-0.03991	0.00133	-0.03991	-0.03991	-0.0504	-0.05489	-0.19537	-0.05706	-0.07564	-0.03991	0.21521	-0.06689	-0.054	-0.30577	-0.03991	0.63378	0.63378	-0.03991	-0.05704	-0.03991	-0.04987	-0.03991	-0.03991	-0.03991	0.59316	-0.03991	-0.03991	-0.03991	-0.03991	0.67816	-0.03991	0.63378	-0.0561	-0.05004	-0.17451	-0.03991	-0.05636
KE7	0.1154	-0.03248	-0.03161	0.07576	-0.02273	0.1514	-0.02925	-0.03595	-0.02273	-0.03978	-0.04723	-0.03936	-0.02273	-0.04215	-0.02273	-0.02273	-0.0287	-0.03126	-0.11125	-0.03249	-0.04307	-0.02273	-0.05338	0.79792	-0.03075	-0.18191	1	-0.02273	-0.02273	1	0.73013	-0.02273	0.9783	-0.02273	-0.02273	1	-0.02892	-0.02273	-0.02273	-0.02273	-0.02273	-0.0357	-0.02273	-0.02273	-0.03194	-0.02849	-0.09937	-0.02273	-0.03209
KE8	0.13198	-0.05929	-0.05771	0.12201	-0.04149	-0.10063	0.109	-0.10701	-0.04149	-0.07261	-0.0188	-0.07185	-0.04149	-0.07693	-0.04149	-0.04149	-0.05239	-0.05705	-0.0601	-0.05931	-0.07862	-0.04149	0.37603	-0.06952	-0.05612	-0.19082	-0.04149	-0.04149	-0.04149	-0.04149	-0.05929	0.76971	-0.05184	0.49419	-0.04149	-0.04149	-0.05278	-0.04149	-0.04149	0.76971	-0.04149	-0.0382	-0.04149	-0.04149	-0.05831	0.88508	-0.02701	-0.04149	-0.05858
KE9	0.13993	-0.03248	-0.03161	0.11136	-0.02273	-0.01896	-0.02925	-0.1111	-0.02273	-0.03978	-0.04723	-0.03936	-0.02273	-0.04215	-0.02273	-0.02273	-0.0287	-0.03126	-0.11125	-0.03249	-0.04307	-0.02273	-0.05338	-0.03809	-0.03075	-0.17971	-0.02273	-0.02273	-0.02273	-0.02273	-0.03248	-0.02273	-0.0284	-0.02273	-0.02273	-0.02273	-0.02892	1	-0.02273	-0.02273	-0.02273	-0.0357	-0.02273	-0.02273	-0.03194	-0.02849	-0.09937	-0.02273	-0.03209
KE10	0.40722	-0.11924	-0.11607	0.3724	-0.01454	-0.04187	0.08487	-0.04288	-0.08344	-0.14605	-0.03385	-0.08221	-0.08344	-0.08507	0.07259	-0.08344	-0.0945	-0.11475	-0.37112	-0.11928	-0.14667	-0.08344	0.10617	0.11293	-0.11288	-0.48083	0.11716	0.31169	0.31169	0.11716	0.03034	0.42313	0.0932	-0.08344	0.0969	0.11716	0.27152	0.4515	-0.02873	0.42313	-0.08344	0.27457	-0.08344	0.31169	-0.02793	0.38352	-0.31562	-0.08344	-0.11782
KE11	0.08537	-0.03248	-0.03161	0.05057	-0.02273	0.02294	-0.02925	-0.11203	-0.02273	-0.03978	0.08147	-0.03936	-0.02273	-0.04215	-0.02273	-0.02273	-0.0287	-0.03126	-0.11125	-0.03249	-0.04307	-0.02273	0.40287	-0.03809	-0.03075	-0.18014	-0.02273	-0.02273	-0.02273	-0.02273	-0.03248	-0.02273	-0.0284	1	-0.02273	-0.02273	-0.02892	-0.02273	-0.02273	-0.02273	-0.02273	-0.0357	-0.02273	-0.02273	-0.03194	0.26826	-0.09937	-0.02273	-0.03209
KE12	0.18926	-0.03248	-0.03161	0.18285	-0.02273	-0.08356	0.17549	-0.0276	-0.02273	-0.03978	-0.04723	-0.03936	-0.02273	-0.04215	-0.02273	-0.02273	-0.0287	-0.03126	-0.11125	-0.03249	-0.04307	-0.02273	0.21416	-0.03809	-0.03075	-0.18026	-0.02273	-0.02273	-0.02273	-0.02273	-0.03248	1	-0.0284	-0.02273	-0.02273	-0.02273	-0.02892	-0.02273	-0.02273	1	-0.02273	-0.0357	-0.02273	-0.02273	-0.03194	0.957	-0.09937	-0.02273	-0.03209
KE13	0.17881	-0.0456	-0.04438	0.14607	-0.03191	-0.02824	0.07514	-0.10935	-0.03191	-0.05585	0.04133	-0.05526	-0.03191	-0.05917	-0.03191	-0.03191	-0.04029	-0.04388	-0.15618	-0.04561	-0.06047	-0.03191	0.45848	-0.05347	-0.04316	-0.25297	-0.03191	-0.03191	-0.03191	-0.03191	-0.0456	0.54856	-0.03987	0.82343	-0.03191	-0.03191	-0.04059	-0.03191	-0.03191	0.54856	-0.03191	-0.05012	-0.03191	-0.03191	-0.04485	0.76752	-0.1395	-0.03191	-0.04506
KE14	0.13824	-0.04631	-0.04507	0.10278	-0.0324	-0.04764	0.02123	-0.06497	-0.0324	-0.05672	-0.06734	0.06705	-0.0324	-0.06009	-0.0324	-0.0324	-0.04092	-0.04456	-0.1586	-0.04632	-0.06141	-0.0324	0.07128	-0.0543	-0.04384	-0.25583	-0.0324	0.63785	0.63785	-0.0324	-0.04631	-0.0324	-0.04049	-0.0324	0.75547	-0.0324	0.59943	-0.0324	-0.0324	-0.0324	-0.0324	0.60409	-0.0324	0.63785	-0.04554	-0.04063	-0.14167	-0.0324	-0.04576
KE15	-0.20186	-0.03248	-0.03161	-0.20666	1	-0.12818	-0.02925	-0.08326	-0.02273	-0.03978	-0.04723	-0.03936	-0.02273	-0.04215	-0.02273	-0.02273	-0.0287	-0.03126	0.14305	-0.03249	-0.04307	-0.02273	-0.05338	-0.03809	-0.03075	-0.18171	-0.02273	-0.02273	-0.02273	-0.02273	-0.03248	-0.02273	-0.0284	-0.02273	-0.02273	-0.02273	-0.02892	-0.02273	-0.02273	-0.02273	-0.02273	-0.0357	-0.02273	-0.02273	-0.03194	-0.02849	-0.09937	-0.02273	-0.03209
KE16	0.20961	-0.05002	-0.04869	0.16389	-0.035	-0.03113	-0.01499	-0.1334	-0.035	-0.06127	-0.05227	-0.00579	-0.035	-0.06491	-0.035	-0.035	-0.03324	-0.04814	-0.17134	-0.05004	-0.05477	-0.035	0.05407	-0.05866	-0.04736	-0.27724	-0.035	-0.035	-0.035	-0.035	-0.05003	0.11518	-0.04374	0.1277	0.09552	-0.035	-0.04453	0.96178	-0.035	0.11518	-0.035	-0.05498	-0.035	-0.035	-0.0492	0.14804	-0.15305	-0.035	-0.04943
KE17	0.09691	-0.03248	-0.03161	0.0713	-0.02273	-0.01624	-0.02925	-0.03719	-0.02273	-0.03978	-0.04723	0.12052	-0.02273	-0.04215	-0.02273	-0.02273	-0.0287	-0.03126	-0.11125	-0.03249	-0.04307	-0.02273	0.13795	-0.03809	-0.03075	-0.17988	-0.02273	-0.02273	-0.02273	-0.02273	-0.03248	-0.02273	-0.0284	-0.02273	1	-0.02273	-0.02892	-0.02273	-0.02273	-0.02273	-0.02273	-0.0357	-0.02273	-0.02273	-0.03194	-0.02849	-0.09937	-0.02273	-0.03209
KE18	0.09703	-0.03248	-0.03161	0.07303	-0.02273	-0.05361	0.06677	-0.05543	-0.02273	-0.03978	-0.04723	-0.03936	-0.02273	-0.04215	-0.02273	-0.02273	-0.0287	-0.03126	-0.11125	-0.03249	-0.04307	-0.02273	-0.05338	-0.03809	-0.03075	-0.17892	-0.02273	1	1	-0.02273	-0.03248	-0.02273	-0.0284	-0.02273	-0.02273	-0.02273	0.94864	-0.02273	-0.02273	-0.02273	-0.02273	0.96374	-0.02273	1	-0.03194	-0.02849	-0.09937	-0.02273	-0.03209
KE19	-0.11902	0.26474	-0.06424	-0.02644	-0.04618	0.10612	-0.05944	0.00912	-0.04618	0.28331	-0.09596	-0.07998	-0.04618	-0.08564	-0.04618	-0.04618	-0.05831	-0.06351	0.03951	-0.06602	-0.0104	0.46125	0.2058	-0.07739	-0.06247	0.13863	-0.04618	-0.04618	-0.04618	-0.04618	-0.066	-0.04618	-0.0577	-0.04618	-0.04618	-0.04618	-0.05875	-0.04618	-0.04618	-0.04618	-0.04618	-0.07253	-0.04618	-0.04618	0.50534	-0.0579	0.2397	-0.04618	-0.0548
KE20	0.1154	-0.03248	-0.03161	0.07576	-0.02273	0.1514	-0.02925	-0.03595	-0.02273	-0.03978	-0.04723	-0.03936	-0.02273	-0.04215	-0.02273	-0.02273	-0.0287	-0.03126	-0.11125	-0.03249	-0.04307	-0.02273	-0.05338	0.79792	-0.03075	-0.18191	1	-0.02273	-0.02273	1	0.73013	-0.02273	0.9783	-0.02273	-0.02273	1	-0.02892	-0.02273	-0.02273	-0.02273	-0.02273	-0.0357	-0.02273	-0.02273	-0.03194	-0.02849	-0.09937	-0.02273	-0.03209
KE21	-0.20186	0.6655	-0.03161	-0.20168	-0.02273	-0.12818	-0.02925	-0.12625	-0.02273	-0.03978	-0.04723	-0.03936	-0.02273	-0.04215	-0.02273	-0.02273	0.97737	-0.03126	0.19338	-0.03249	0.9466	-0.02273	-0.05338	-0.03809	-0.03075	0.02776	-0.02273	-0.02273	-0.02273	-0.02273	0.66654	-0.02273	0.17352	-0.02273	-0.02273	-0.02273	-0.02892	-0.02273	-0.02273	-0.02273	-0.02273	-0.0357	-0.02273	-0.02273	-0.03194	-0.02849	-0.09937	-0.02273	-0.03209
PN1	0.09691	-0.03248	-0.03161	0.0713	-0.02273	-0.01624	-0.02925	-0.03719	-0.02273	-0.03978	-0.04723	0.12052	-0.02273	-0.04215	-0.02273	-0.02273	-0.0287	-0.03126	-0.11125	-0.03249	-0.04307	-0.02273	0.13795	-0.03809	-0.03075	-0.17988	-0.02273	-0.02273	-0.02273	-0.02273	-0.03248	-0.02273	-0.0284	-0.02273	1	-0.02273	-0.02892	-0.02273	-0.02273	-0.02273	-0.02273	-0.0357	-0.02273	-0.02273	-0.03194	-0.02849	-0.09937	-0.02273	-0.03209
PN2	0.08763	-0.03956	-0.03851	0.05909	-0.02768	-0.04955	-0.03563	-0.13899	0.22006	-0.04845	-0.05752	-0.04794	0.22006	-0.05133	-0.02768	-0.02768	-0.03495	0.17998	-0.02827	-0.03957	-0.05246	-0.02768	-0.06502	-0.04639	-0.03745	-0.13631	-0.02768	-0.02768	-0.02768	-0.02768	-0.03956	-0.02768	-0.03459	-0.02768	-0.02768	-0.02768	-0.03522	0.97023	-0.02768	-0.02768	-0.02768	-0.04348	-0.02768	-0.02768	-0.03891	-0.03471	0.01226	-0.02768	-0.03909
PN3	0.00887	-0.04698	-0.04573	-0.01119	-0.03288	-0.10446	0.04887	-0.10402	-0.03288	-0.03135	-0.06832	-0.05694	-0.03288	-0.0545	-0.03288	-0.03288	-0.04151	-0.04521	-0.02293	-0.00879	-0.0623	-0.03288	-0.07722	-0.0551	0.25507	-0.05938	-0.03288	0.93829	0.93829	-0.03288	-0.04698	-0.03288	-0.04108	-0.03288	-0.03288	-0.03288	0.88645	-0.03288	-0.03288	-0.03288	-0.03288	0.92605	-0.03288	0.93829	-0.04621	-0.04122	-0.03313	-0.03288	-0.04642
PN4	0.09903	-0.03248	-0.03161	0.1112	-0.02273	-0.04168	-0.02925	-0.05048	-0.02273	-0.03978	0.08514	-0.03936	-0.02273	0.07934	-0.02273	-0.02273	-0.0287	-0.03126	-0.11125	-0.03249	-0.04307	-0.02273	-0.05338	-0.03809	-0.03075	-0.1647	-0.02273	-0.02273	-0.02273	-0.02273	-0.03248	-0.02273	-0.0284	-0.02273	-0.02273	-0.02273	-0.02892	-0.02273	-0.02273	-0.02273	-0.02273	0.09734	-0.02273	-0.02273	-0.03194	-0.02849	-0.09937	-0.02273	-0.03209
PN5	0.13672	-0.04519	-0.04399	0.13437	-0.03162	-0.06434	0.01049	-0.07288	-0.03162	-0.05535	0.0479	-0.05477	-0.03162	0.04563	-0.03162	-0.03162	-0.03993	-0.04349	-0.15478	-0.04521	-0.05993	-0.03162	-0.07428	-0.05299	-0.04278	-0.23674	-0.03162	0.51356	0.51356	-0.03162	-0.04519	-0.03162	-0.03951	-0.03162	-0.03162	-0.03162	0.48088	-0.03162	-0.03162	-0.03162	-0.03162	0.59729	-0.03162	0.51356	-0.04445	-0.03965	-0.13826	-0.03162	-0.04465
PN6	0.22537	-0.04564	-0.04442	0.07907	-0.03193	-0.00197	-0.0411	-0.04827	-0.03193	-0.0559	-0.06636	-0.05531	-0.03193	-0.05922	0.82093	-0.03193	-0.04032	-0.04392	-0.15631	-0.04565	-0.06052	-0.03193	-0.07501	0.17265	-0.0432	-0.25513	-0.03193	-0.03193	-0.03193	-0.03193	-0.04564	-0.03193	-0.0399	-0.03193	-0.03193	-0.03193	-0.04063	-0.03193	-0.03193	-0.03193	-0.03193	-0.05016	-0.03193	-0.03193	0.4435	-0.04004	-0.13962	-0.03193	-0.04509
PN7	0.45018	-0.12805	-0.12464	0.26154	0.2497	0.00585	0.19774	-0.20618	-0.0896	-0.15683	0.26004	-0.04652	-0.0896	0.10934	0.13105	-0.0896	-0.09201	-0.12323	-0.35421	-0.12809	-0.14751	-0.0896	0.02588	0.48704	-0.12122	-0.70744	0.47243	0.05403	0.05403	0.47243	0.29103	0.05819	0.44126	0.08942	0.18101	0.47243	0.02329	0.50157	0.18517	0.05819	-0.0896	0.03618	-0.0896	0.05403	0.000411781	0.08202	-0.39176	-0.0896	-0.12653
PN8	-0.55981	0.31644	0.16055	-0.45864	-0.13203	-0.18524	-0.16415	0.02693	0.27559	0.0932	-0.24149	0.05831	0.27559	-0.12197	-0.13203	-0.05297	0.24165	0.22073	0.53445	0.08278	0.23371	0.19242	-0.05555	-0.22127	0.06323	0.62616	-0.13203	-0.13203	-0.13203	-0.13203	0.0188	-0.13203	-0.06734	-0.13203	-0.13203	-0.13203	0.008	-0.13203	-0.13203	-0.13203	0.42412	-0.11456	-0.10876	-0.13203	-0.17361	-0.16554	0.64326	0.08564	0.14856
AC1	-0.67049	0.14548	-0.11355	-0.66533	-0.08163	-0.4237	-0.10507	-0.30225	-0.08163	-0.14289	-0.16964	0.32964	-0.08163	-0.15139	-0.08163	-0.02026	0.2748	-0.11227	0.69192	-0.1167	0.22152	0.2542	0.08159	-0.13681	-0.11044	0.52898	-0.08163	-0.08163	-0.08163	-0.08163	0.14586	-0.08163	-0.02617	-0.08163	-0.08163	-0.08163	-0.10386	-0.08163	-0.08163	-0.08163	-0.08163	-0.02883	-0.08163	-0.08163	-0.11474	-0.10235	0.29359	0.39833	0.36598
AC2	0.05947	-0.03248	-0.03161	0.05348	-0.02273	0.59516	-0.02925	-0.12625	-0.02273	-0.03978	-0.04723	-0.03936	-0.02273	0.11309	-0.02273	-0.02273	-0.0287	-0.03126	-0.08015	-0.03249	-0.04307	-0.02273	-0.05338	-0.03809	0.42856	0.26982	-0.02273	-0.02273	-0.02273	-0.02273	-0.03248	-0.02273	-0.0284	-0.02273	-0.02273	-0.02273	-0.02892	-0.02273	-0.02273	-0.02273	-0.02273	-0.0357	-0.02273	-0.02273	-0.03194	-0.02849	-0.08593	-0.02273	-0.02691
AC3	-0.20741	-0.05748	-0.05595	-0.18683	-0.04022	-0.14902	-0.05177	0.19493	-0.04022	-0.0704	-0.08358	0.49256	-0.04022	-0.07459	-0.04022	-0.04022	-0.05079	-0.05531	0.2481	0.34886	-0.07622	-0.04022	-0.04307	-0.0674	-0.05441	0.14775	-0.04022	-0.04022	-0.04022	-0.04022	-0.05748	-0.04022	-0.05026	-0.04022	-0.04022	-0.04022	-0.05117	-0.04022	-0.04022	-0.04022	-0.04022	-0.06318	-0.04022	-0.04022	-0.05653	-0.05043	0.13832	0.61054	0.01136
AC4	-0.32312	-0.01583	-0.06012	-0.30583	-0.04994	-0.21536	-0.06428	0.04305	-0.04994	-0.07967	-0.10378	-0.07105	-0.04994	-0.09261	-0.04994	-0.03931	0.01724	-0.06868	0.29076	0.22808	-0.01375	0.71591	0.36111	-0.08369	-0.05585	0.34439	-0.04994	-0.04994	-0.04994	-0.04994	-0.01575	-0.04994	-0.04633	-0.04994	-0.04994	-0.04994	-0.06354	-0.04994	-0.04994	-0.04994	-0.04994	-0.07027	-0.04994	-0.04994	-0.07019	-0.06261	0.36027	-0.03206	0.25195
AC5	-0.06953	0.05547	0.42303	0.02325	-0.05319	-0.08919	-0.06846	0.08721	0.153	-0.09309	-0.1021	-0.06693	0.153	-0.03465	-0.05319	0.3277	-0.04116	0.11948	0.03503	-0.05592	0.08266	-0.03273	-0.10804	-0.08913	0.15037	0.1979	-0.05319	-0.05319	-0.05319	-0.05319	-0.05794	-0.05319	-0.06124	-0.05319	-0.05319	-0.05319	-0.06767	-0.05319	-0.05319	-0.05319	-0.05319	-0.07588	-0.05319	-0.05319	-0.07476	-0.06668	0.16168	-0.05319	-0.04657
AC6	-0.78205	0.38435	-0.12904	-0.78172	-0.09277	-0.50156	-0.1194	-0.34808	0.18046	-0.16237	-0.19278	-0.03594	0.18046	-0.17203	-0.09277	-0.08457	0.26566	0.1129	0.79698	-0.02315	0.20134	0.21702	-0.00341	-0.15546	0.26378	0.70129	-0.09277	-0.09277	-0.09277	-0.09277	0.13337	-0.09277	-0.03909	-0.09277	-0.09277	-0.09277	-0.11802	-0.09277	-0.09277	-0.09277	-0.09277	-0.02391	-0.09277	-0.09277	-0.13039	-0.1163	0.66837	-0.05276	0.24685
AC7	-0.38056	0.34569	-0.0596	-0.38321	-0.04285	-0.24165	-0.05515	-0.23743	-0.04285	-0.075	-0.08904	-0.07421	-0.04285	-0.07946	-0.04285	-0.04285	0.52905	-0.05892	0.39572	-0.06125	0.49245	-0.03578	-0.09626	-0.0718	-0.05796	0.25813	-0.04285	-0.04285	-0.04285	-0.04285	0.34395	-0.04285	0.0635	-0.04285	-0.04285	-0.04285	-0.05451	-0.04285	-0.04285	-0.04285	-0.04285	0.03397	-0.04285	-0.04285	-0.06022	-0.05372	-0.01471	-0.04285	0.04753
AC8	0.05797	-0.03248	-0.03161	0.10277	-0.02273	0.00678	-0.02925	0.59926	-0.02273	-0.03978	-0.04723	-0.03936	-0.02273	-0.04215	-0.02273	-0.02273	-0.0287	-0.03126	-0.09392	0.67221	-0.04307	-0.02273	-0.05338	-0.03809	-0.03075	0.07706	-0.02273	-0.02273	-0.02273	-0.02273	-0.03248	-0.02273	-0.0284	-0.02273	-0.02273	-0.02273	-0.02892	-0.02273	-0.02273	-0.02273	-0.02273	-0.0357	-0.02273	-0.02273	-0.03194	-0.02849	0.25103	-0.02273	-0.03209
AC9	-0.25107	0.69823	-0.03932	-0.25518	-0.02827	-0.15943	-0.03638	-0.15702	-0.02827	-0.04948	-0.05874	-0.04896	-0.02827	-0.05242	-0.02827	-0.02827	-0.03555	-0.03887	0.22551	-0.04041	-0.05357	-0.02827	-0.0664	-0.04737	-0.03824	0.1907	-0.02827	-0.02827	-0.02827	-0.02827	-0.0404	-0.02827	-0.03532	-0.02827	-0.02827	-0.02827	-0.03596	-0.02827	-0.02827	-0.02827	-0.02827	-0.0444	-0.02827	-0.02827	-0.03973	-0.03544	0.25854	-0.02827	-0.03992
AC10	0.24784	-0.06241	-0.06075	0.13416	-0.04367	-0.02527	0.14324	-0.07324	-0.04367	-0.07644	0.02408	0.07509	-0.04367	-0.04877	0.3448	-0.04367	-0.05245	-0.06006	-0.21376	-0.06243	-0.07991	-0.04367	0.12974	-0.05361	-0.05908	-0.346	-0.04367	0.23262	0.23262	-0.04367	-0.06241	-0.04367	-0.05457	0.09551	0.86623	-0.04367	0.20853	-0.04367	0.13291	-0.04367	-0.04367	0.20141	-0.04367	0.23262	0.16107	-0.01437	-0.19094	-0.04367	-0.06167
AC11	0.13589	-0.03248	-0.03161	0.19682	-0.02273	0.07286	-0.02925	0.09889	-0.02273	0.47946	-0.04723	-0.03936	-0.02273	0.08609	-0.02273	-0.02273	-0.0287	-0.03126	-0.0596	0.72489	-0.04307	-0.02273	-0.05338	-0.03809	-0.03075	0.08116	-0.02273	-0.02273	-0.02273	-0.02273	-0.03248	-0.02273	-0.0284	-0.02273	-0.02273	-0.02273	-0.02892	-0.02273	-0.02273	-0.02273	-0.02273	0.07061	-0.02273	-0.02273	-0.03194	-0.02849	-0.09937	-0.02273	-0.03209
AK1	0.37296	-0.09783	-0.09522	0.21264	0.07631	-0.00879	0.01532	-0.1427	-0.06846	-0.11982	0.16081	0.02657	-0.06846	-0.01772	0.13365	-0.06846	-0.07816	-0.09414	-0.29908	-0.09786	-0.121	-0.06846	0.39094	0.11899	-0.09261	-0.54183	-0.0235	0.08622	0.08622	-0.0235	-0.06431	-0.02917	-0.04129	0.00163	0.69361	-0.0235	0.06075	0.10817	0.01402	-0.02917	-0.06846	0.05353	-0.06846	0.08622	0.01952	-0.02763	-0.2993	-0.06846	-0.09667
AK2	0.09231	-0.04449	0.73523	0.20607	-0.03113	0.22755	-0.04007	0.22782	-0.03113	0.5899	-0.0647	-0.05392	-0.03113	-0.05774	-0.03113	-0.03113	-0.03931	-0.04282	-0.14067	-0.04451	0.05433	-0.03113	-0.07313	-0.05218	-0.04212	0.05026	-0.03113	-0.03113	-0.03113	-0.03113	-0.04449	-0.03113	-0.0389	-0.03113	-0.03113	-0.03113	-0.03961	-0.03113	-0.03113	-0.03113	-0.03113	0.04057	-0.03113	-0.03113	-0.04376	-0.03903	-0.13612	-0.03113	-0.01844
AK3	-0.03808	-0.01502	0.55103	0.17066	-0.10411	0.11927	-0.134	0.58816	-0.10411	0.26845	-0.18838	-0.09418	-0.10411	-0.08401	-0.10411	0.21175	-0.13146	-0.10614	-0.11812	0.14186	-0.02443	0.07098	-0.09812	-0.17447	-0.11823	0.27084	-0.10411	-0.10411	-0.10411	-0.10411	-0.14878	-0.10411	-0.13009	-0.10411	-0.10411	-0.10411	-0.13245	-0.10411	-0.10411	-0.10411	-0.10411	-0.08347	0.06993	-0.10411	-0.14633	-0.13053	0.16104	-0.10411	-0.08905
AK4	-0.20186	-0.03248	-0.03161	-0.20666	1	-0.12818	-0.02925	-0.08326	-0.02273	-0.03978	-0.04723	-0.03936	-0.02273	-0.04215	-0.02273	-0.02273	-0.0287	-0.03126	0.14305	-0.03249	-0.04307	-0.02273	-0.05338	-0.03809	-0.03075	-0.18171	-0.02273	-0.02273	-0.02273	-0.02273	-0.03248	-0.02273	-0.0284	-0.02273	-0.02273	-0.02273	-0.02892	-0.02273	-0.02273	-0.02273	-0.02273	-0.0357	-0.02273	-0.02273	-0.03194	-0.02849	-0.09937	-0.02273	-0.03209
AK5	0.35617	-0.12416	-0.12086	0.20026	0.33077	0.0242	0.22151	-0.00635	-0.08688	-0.15208	0.12482	0.00653	-0.08688	0.04263	0.13123	-0.08688	-0.07226	-0.11949	-0.31426	0.03805	-0.12515	-0.08688	-0.15692	0.37782	-0.07054	-0.58066	0.29976	0.47297	0.47297	0.29976	0.16414	-0.08688	0.27202	-0.08688	0.16518	0.29976	0.42459	-0.08688	0.19886	-0.08688	-0.08688	0.44885	-0.08688	0.47297	0.00278	-0.10893	-0.29782	-0.08688	-0.12216
AK6	0.06848	-0.03248	-0.03161	0.15092	-0.02273	0.34168	-0.02925	0.1329	-0.02273	0.50418	-0.04723	-0.03936	-0.02273	-0.04215	-0.02273	-0.02273	-0.0287	-0.03126	-0.11125	-0.03249	0.07213	-0.02273	-0.05338	-0.03809	-0.03075	-0.000818973	-0.02273	-0.02273	-0.02273	-0.02273	-0.03248	-0.02273	-0.0284	-0.02273	-0.02273	-0.02273	-0.02892	-0.02273	-0.02273	-0.02273	-0.02273	-0.0357	-0.02273	-0.02273	0.81991	-0.02849	0.00564	-0.02273	-0.01655
AK7	0.20714	-0.04073	-0.03964	0.19087	-0.0285	-0.07384	0.16059	-0.05913	-0.0285	-0.04988	-0.02184	-0.04936	-0.0285	-0.05285	-0.0285	-0.0285	-0.03599	-0.03919	-0.1395	-0.04074	-0.05401	-0.0285	0.32336	-0.04776	-0.03856	-0.226	-0.0285	-0.0285	-0.0285	-0.0285	-0.04073	0.95691	-0.03561	0.26856	-0.0285	-0.0285	-0.03626	-0.0285	-0.0285	0.95691	-0.0285	-0.04476	-0.0285	-0.0285	-0.04006	1	-0.12461	-0.0285	-0.04024
AK8	-0.71314	0.28793	-0.19419	-0.70293	-0.1396	-0.43264	-0.17969	-0.20328	0.19207	-0.24435	-0.2901	0.14256	0.19207	-0.25888	-0.1396	0.03554	0.17593	0.09993	0.71516	0.01576	0.09469	0.10758	-0.10497	0.07571	0.16633	0.5467	0.09899	-0.1396	-0.1396	0.09899	0.22301	-0.1396	0.13107	-0.1396	0.03092	0.09899	-0.17761	0.02607	-0.1396	-0.1396	-0.1396	-0.14924	0.16794	-0.1396	-0.19621	-0.17502	0.58822	0.10901	0.14393
AK9	-0.11181	-0.17029	0.20703	0.03249	-0.15403	0.24613	-0.14079	0.09632	0.18209	0.35408	-0.14132	-0.0586	0.18209	0.04505	-0.13319	-0.00379	-0.33399	0.27871	0.06233	0.03736	-0.23988	-0.03202	-0.17977	-0.19256	0.24826	0.41034	-0.11269	-0.04479	-0.04479	-0.11269	-0.27109	-0.08849	-0.18351	-0.1342	-0.08277	-0.11269	-0.12942	-0.08815	-0.11807	-0.08849	-0.27369	0.00114	0.24595	-0.04479	0.09919	-0.12421	0.23277	-0.05622	0.03426
ET1	0.21954	-0.06651	-0.06474	0.17539	0.02586	-0.06221	0.03161	-0.0946	-0.04654	-0.08146	0.13215	-0.02322	-0.04654	0.08801	0.04954	-0.04654	-0.05194	-0.06401	-0.20981	-0.06653	-0.081	-0.04654	0.0067	-0.00727	-0.06296	-0.35412	-0.04654	0.03865	0.03865	-0.04654	-0.06651	0.03311	-0.05815	0.07036	0.18345	-0.04654	0.02222	-0.04654	0.02223	0.03311	-0.04654	0.13956	-0.04654	0.03865	-0.0104	0.05233	-0.20349	-0.04654	-0.06572
ET2	0.09401	-0.04251	-0.04138	0.0707	-0.02975	-0.02816	-0.03829	-0.1212	0.23251	-0.05207	-0.06182	-0.05152	0.23251	-0.05516	-0.02975	-0.02975	-0.03756	0.18991	-0.0321	-0.04252	-0.05637	-0.02975	-0.06987	-0.04985	-0.04024	-0.13289	-0.02975	-0.02975	-0.02975	-0.02975	-0.04251	-0.02975	-0.03717	-0.02975	-0.02975	-0.02975	-0.03784	0.96368	-0.02975	-0.02975	-0.02975	-0.04672	0.05314	-0.02975	-0.04181	-0.03729	0.01858	-0.02975	-0.02754
ET3	0.22814	-0.03248	-0.03161	0.12453	-0.02273	0.03048	0.97572	0.01848	-0.02273	-0.03978	0.31312	-0.03936	-0.02273	-0.04215	-0.02273	-0.02273	-0.0287	-0.03126	-0.11125	-0.03249	-0.04307	-0.02273	-0.05338	-0.03809	-0.03075	-0.17891	-0.02273	-0.02273	-0.02273	-0.02273	-0.03248	-0.02273	-0.0284	-0.02273	-0.02273	-0.02273	-0.02892	-0.02273	1	-0.02273	-0.02273	-0.0357	-0.02273	-0.02273	-0.03194	-0.02849	-0.09937	-0.02273	-0.03209
OT1	0.17497	-0.07743	-0.07537	0.13608	-0.05418	-0.0569	-0.06974	0.01257	-0.05418	-0.09484	0.0241	-0.09384	-0.05418	-0.04203	0.41215	-0.05418	-0.06842	-0.07451	-0.23162	-0.07746	-0.03724	-0.05418	0.13155	-0.0908	-0.0733	-0.25417	-0.05418	-0.05418	-0.05418	-0.05418	-0.07743	-0.05418	-0.0677	0.52598	-0.05418	-0.05418	-0.06893	-0.05418	-0.05418	-0.05418	-0.05418	-0.0211	-0.05418	-0.05418	0.19088	0.10041	-0.15877	-0.05418	-0.06871
OT2	0.25583	-0.05643	-0.05493	0.1534	-0.03949	0.02435	-0.05083	-0.04968	-0.03949	-0.06912	0.02609	0.09899	-0.03949	-0.07323	-0.03949	-0.03949	0.00343	-0.05431	-0.19329	-0.05645	-0.01862	-0.03949	0.17923	0.20138	-0.05342	-0.31496	-0.03949	-0.03949	-0.03949	-0.03949	-0.05644	-0.03949	-0.04934	-0.03949	-0.03949	-0.03949	-0.05024	-0.03949	-0.03949	-0.03949	-0.03949	-0.06203	-0.03949	-0.03949	-0.05551	-0.04951	-0.17266	-0.03949	-0.05576
OT3	0.18816	-0.03248	-0.03161	0.10514	-0.02273	0.0512	-0.02925	-0.05141	-0.02273	-0.03978	0.21016	-0.03936	-0.02273	-0.04215	-0.02273	-0.02273	-0.0287	-0.03126	-0.11125	-0.03249	-0.04307	-0.02273	0.59391	-0.03809	-0.03075	-0.1797	-0.02273	-0.02273	-0.02273	-0.02273	-0.03248	-0.02273	-0.0284	-0.02273	-0.02273	-0.02273	-0.02892	-0.02273	-0.02273	-0.02273	-0.02273	-0.0357	-0.02273	-0.02273	-0.03194	-0.02849	-0.09937	-0.02273	-0.03209
OT4	0.19993	-0.11974	-0.11655	0.0874	0.37928	-0.05949	0.03056	-0.15287	-0.08379	-0.14666	-0.02967	0.00305	-0.08379	-0.13227	-0.02387	-0.08379	-0.09432	-0.11523	-0.15444	-0.02548	-0.1467	-0.08379	0.06252	0.37501	-0.11335	-0.49757	0.33815	0.02967	0.02967	0.33815	0.19488	-0.000819453	0.31063	-0.00578	0.0318	0.33815	0.00185	0.64982	0.02932	-0.000819453	-0.08379	0.00908	-0.08379	0.02967	-0.08346	-0.00247	-0.26563	-0.00578	-0.11015
OT5	0.46156	-0.15935	-0.15511	0.2335	0.26488	-0.05965	0.29617	-0.19599	-0.11151	-0.19518	0.31973	0.06975	-0.11151	0.06947	0.17321	-0.11151	-0.11426	-0.15336	-0.33779	-0.10967	-0.18332	-0.11151	0.22351	0.42564	-0.15086	-0.77222	0.27055	0.22594	0.22594	0.27055	0.12553	0.16672	0.23674	0.21621	0.16023	0.27055	0.18068	-0.11151	0.24703	0.16672	-0.11151	0.19745	-0.11151	0.22594	0.00631	0.22339	-0.40585	-0.02066	-0.14795
OT6	0.45979	-0.12802	-0.18529	0.22539	0.16051	-0.12018	0.25152	-0.28755	-0.05044	-0.22854	0.29085	-0.02559	-0.05044	0.06915	0.12512	-0.13222	-0.08535	-0.09684	-0.31895	-0.12358	-0.16928	-0.06573	0.16792	0.3389	-0.11951	-0.74738	0.17258	0.20612	0.20612	0.17258	0.0764	0.1695	0.14729	0.12029	0.15894	0.17258	0.16208	0.44969	0.20291	0.1695	-0.11043	0.18785	-0.12197	0.20612	-0.04344	0.19823	-0.36278	-0.05543	-0.14182
OT7	0.1154	-0.03248	-0.03161	0.07576	-0.02273	0.1514	-0.02925	-0.03595	-0.02273	-0.03978	-0.04723	-0.03936	-0.02273	-0.04215	-0.02273	-0.02273	-0.0287	-0.03126	-0.11125	-0.03249	-0.04307	-0.02273	-0.05338	0.79792	-0.03075	-0.18191	1	-0.02273	-0.02273	1	0.73013	-0.02273	0.9783	-0.02273	-0.02273	1	-0.02892	-0.02273	-0.02273	-0.02273	-0.02273	-0.0357	-0.02273	-0.02273	-0.03194	-0.02849	-0.09937	-0.02273	-0.03209
OT8	0.25222	-0.06575	-0.064	0.16279	0.00809	0.12615	-0.03113	-0.08845	-0.04601	-0.08054	0.06915	-0.06806	-0.04601	-0.04041	-0.01355	-0.04601	-0.0544	-0.06328	-0.21176	-0.06578	-0.08329	-0.04601	0.19423	0.69593	-0.06225	-0.36296	0.8509	0.16344	0.16344	0.8509	0.60304	-0.00389	0.82536	-0.04601	-0.04601	0.8509	0.14166	-0.04601	-0.04601	-0.00389	-0.04601	0.1596	-0.04601	0.16344	-0.04608	-0.0171	-0.20117	-0.04601	-0.06497
OT9	0.30094	-0.08637	-0.11675	0.18394	-0.0669	-0.10562	0.19803	-0.25376	-0.08393	-0.14691	0.33255	-0.02539	-0.08393	0.09447	-0.08393	-0.08393	-0.10596	-0.11543	-0.20481	-0.11999	-0.15905	-0.00283	0.57616	0.06199	-0.05925	-0.42157	-0.08393	-0.0049	-0.0049	-0.08393	-0.11995	0.44303	-0.10487	0.43298	0.42408	-0.08393	-0.03124	-0.08393	0.11263	0.44303	-0.08393	0.01966	-0.08393	-0.0049	-0.11797	0.55254	-0.20902	-0.03699	-0.00337
OT10	0.13993	-0.03248	-0.03161	0.11136	-0.02273	-0.01896	-0.02925	-0.1111	-0.02273	-0.03978	-0.04723	-0.03936	-0.02273	-0.04215	-0.02273	-0.02273	-0.0287	-0.03126	-0.11125	-0.03249	-0.04307	-0.02273	-0.05338	-0.03809	-0.03075	-0.17971	-0.02273	-0.02273	-0.02273	-0.02273	-0.03248	-0.02273	-0.0284	-0.02273	-0.02273	-0.02273	-0.02892	1	-0.02273	-0.02273	-0.02273	-0.0357	-0.02273	-0.02273	-0.03194	-0.02849	-0.09937	-0.02273	-0.03209
OT11	0.13993	-0.03248	-0.03161	0.11136	-0.02273	-0.01896	-0.02925	-0.1111	-0.02273	-0.03978	-0.04723	-0.03936	-0.02273	-0.04215	-0.02273	-0.02273	-0.0287	-0.03126	-0.11125	-0.03249	-0.04307	-0.02273	-0.05338	-0.03809	-0.03075	-0.17971	-0.02273	-0.02273	-0.02273	-0.02273	-0.03248	-0.02273	-0.0284	-0.02273	-0.02273	-0.02273	-0.02892	1	-0.02273	-0.02273	-0.02273	-0.0357	-0.02273	-0.02273	-0.03194	-0.02849	-0.09937	-0.02273	-0.03209
OT12	-0.17257	0.63113	-0.03971	-0.1606	-0.02855	-0.12776	-0.03361	-0.08246	-0.02855	-0.04997	-0.05932	-0.04944	-0.02855	-0.05294	-0.02855	-0.02855	0.99168	-0.03926	0.15578	-0.04081	0.95984	-0.02855	-0.06705	-0.04784	-0.03862	0.0114	-0.02855	-0.02855	-0.02855	-0.02855	0.63213	-0.02855	0.17905	-0.02855	-0.02855	-0.02855	0.05863	-0.02855	-0.02855	-0.02855	0.27152	-0.04484	-0.02855	-0.02855	-0.04012	-0.03579	-0.12481	-0.02855	-0.04031
OT13	0.13993	-0.03248	-0.03161	0.11136	-0.02273	-0.01896	-0.02925	-0.1111	-0.02273	-0.03978	-0.04723	-0.03936	-0.02273	-0.04215	-0.02273	-0.02273	-0.0287	-0.03126	-0.11125	-0.03249	-0.04307	-0.02273	-0.05338	-0.03809	-0.03075	-0.17971	-0.02273	-0.02273	-0.02273	-0.02273	-0.03248	-0.02273	-0.0284	-0.02273	-0.02273	-0.02273	-0.02892	1	-0.02273	-0.02273	-0.02273	-0.0357	-0.02273	-0.02273	-0.03194	-0.02849	-0.09937	-0.02273	-0.03209
OT14	0.1154	-0.03248	-0.03161	0.07576	-0.02273	0.1514	-0.02925	-0.03595	-0.02273	-0.03978	-0.04723	-0.03936	-0.02273	-0.04215	-0.02273	-0.02273	-0.0287	-0.03126	-0.11125	-0.03249	-0.04307	-0.02273	-0.05338	0.79792	-0.03075	-0.18191	1	-0.02273	-0.02273	1	0.73013	-0.02273	0.9783	-0.02273	-0.02273	1	-0.02892	-0.02273	-0.02273	-0.02273	-0.02273	-0.0357	-0.02273	-0.02273	-0.03194	-0.02849	-0.09937	-0.02273	-0.03209
OT15	0.00891	0.31674	-0.05168	-0.01226	-0.03715	0.05244	-0.04481	-0.05888	-0.03715	-0.06503	-0.07721	-0.06435	-0.03715	-0.0689	-0.03715	-0.03715	0.54311	-0.0511	-0.01827	-0.05311	0.51285	-0.03715	-0.08727	0.62548	-0.05026	-0.14968	0.8042	-0.03715	-0.03715	0.8042	0.94465	-0.03715	0.9083	-0.03715	-0.03715	0.8042	0.04406	-0.03715	-0.03715	-0.03715	0.25147	-0.05836	-0.03715	-0.03715	-0.05222	-0.04658	-0.16244	-0.03715	-0.05246
OT16	0.13993	-0.03248	-0.03161	0.11136	-0.02273	-0.01896	-0.02925	-0.1111	-0.02273	-0.03978	-0.04723	-0.03936	-0.02273	-0.04215	-0.02273	-0.02273	-0.0287	-0.03126	-0.11125	-0.03249	-0.04307	-0.02273	-0.05338	-0.03809	-0.03075	-0.17971	-0.02273	-0.02273	-0.02273	-0.02273	-0.03248	-0.02273	-0.0284	-0.02273	-0.02273	-0.02273	-0.02892	1	-0.02273	-0.02273	-0.02273	-0.0357	-0.02273	-0.02273	-0.03194	-0.02849	-0.09937	-0.02273	-0.03209
OT17	0.13993	-0.03248	-0.03161	0.11136	-0.02273	-0.01896	-0.02925	-0.1111	-0.02273	-0.03978	-0.04723	-0.03936	-0.02273	-0.04215	-0.02273	-0.02273	-0.0287	-0.03126	-0.11125	-0.03249	-0.04307	-0.02273	-0.05338	-0.03809	-0.03075	-0.17971	-0.02273	-0.02273	-0.02273	-0.02273	-0.03248	-0.02273	-0.0284	-0.02273	-0.02273	-0.02273	-0.02892	1	-0.02273	-0.02273	-0.02273	-0.0357	-0.02273	-0.02273	-0.03194	-0.02849	-0.09937	-0.02273	-0.03209
OT18	0.17308	-0.04631	-0.04507	0.14209	-0.0324	-0.04184	-0.04171	-0.03142	-0.0324	-0.05672	0.0346	0.11492	-0.0324	0.03347	-0.0324	-0.0324	0.01355	-0.04456	-0.15861	-0.04632	-0.00397	-0.0324	-0.07611	-0.0543	-0.04384	-0.24611	-0.0324	-0.0324	-0.0324	-0.0324	-0.04631	-0.0324	-0.04049	-0.0324	-0.0324	-0.0324	-0.04123	-0.0324	-0.0324	-0.0324	-0.0324	0.05155	-0.0324	-0.0324	-0.04555	-0.04063	-0.14168	-0.0324	-0.04576
OT19	0.18816	-0.03248	-0.03161	0.10514	-0.02273	0.0512	-0.02925	-0.05141	-0.02273	-0.03978	0.21016	-0.03936	-0.02273	-0.04215	-0.02273	-0.02273	-0.0287	-0.03126	-0.11125	-0.03249	-0.04307	-0.02273	0.59391	-0.03809	-0.03075	-0.1797	-0.02273	-0.02273	-0.02273	-0.02273	-0.03248	-0.02273	-0.0284	-0.02273	-0.02273	-0.02273	-0.02892	-0.02273	-0.02273	-0.02273	-0.02273	-0.0357	-0.02273	-0.02273	-0.03194	-0.02849	-0.09937	-0.02273	-0.03209
OT20	0.12166	-0.03248	-0.03161	0.18511	-0.02273	0.2854	-0.02925	0.23558	-0.02273	-0.03978	-0.04723	-0.03936	-0.02273	-0.04215	-0.02273	-0.02273	-0.0287	-0.03126	-0.11125	-0.03249	-0.04307	-0.02273	-0.05338	-0.03809	-0.03075	0.00422	-0.02273	-0.02273	-0.02273	-0.02273	-0.03248	-0.02273	-0.0284	-0.02273	-0.02273	-0.02273	-0.02892	-0.02273	-0.02273	-0.02273	-0.02273	-0.0357	1	-0.02273	-0.03194	-0.02849	-0.00625	-0.02273	0.14642
OT21	-0.20186	0.6655	-0.03161	-0.20168	-0.02273	-0.12818	-0.02925	-0.12625	-0.02273	-0.03978	-0.04723	-0.03936	-0.02273	-0.04215	-0.02273	-0.02273	0.97737	-0.03126	0.19338	-0.03249	0.9466	-0.02273	-0.05338	-0.03809	-0.03075	0.02776	-0.02273	-0.02273	-0.02273	-0.02273	0.66654	-0.02273	0.17352	-0.02273	-0.02273	-0.02273	-0.02892	-0.02273	-0.02273	-0.02273	-0.02273	-0.0357	-0.02273	-0.02273	-0.03194	-0.02849	-0.09937	-0.02273	-0.03209
OT22	-0.20186	0.6655	-0.03161	-0.20168	-0.02273	-0.12818	-0.02925	-0.12625	-0.02273	-0.03978	-0.04723	-0.03936	-0.02273	-0.04215	-0.02273	-0.02273	0.97737	-0.03126	0.19338	-0.03249	0.9466	-0.02273	-0.05338	-0.03809	-0.03075	0.02776	-0.02273	-0.02273	-0.02273	-0.02273	0.66654	-0.02273	0.17352	-0.02273	-0.02273	-0.02273	-0.02892	-0.02273	-0.02273	-0.02273	-0.02273	-0.0357	-0.02273	-0.02273	-0.03194	-0.02849	-0.09937	-0.02273	-0.03209
OT23	0.4471	-0.1287	-0.12528	0.24411	0.20955	-0.02234	-0.07766	-0.20148	-0.09006	-0.15764	0.33167	-0.03128	-0.09006	0.1972	0.2658	-0.09006	-0.09205	-0.12386	-0.36633	-0.12875	-0.14781	-0.09006	0.22519	0.32401	-0.12184	-0.70843	0.25941	0.12391	0.12391	0.25941	0.13187	0.00069308	0.23145	0.20649	0.27219	0.25941	0.08994	0.10244	-0.09006	0.00069308	-0.09006	0.12544	-0.09006	0.12391	0.07719	0.06058	-0.39376	-0.09006	-0.12717
OT24	0.1154	-0.03248	-0.03161	0.07576	-0.02273	0.1514	-0.02925	-0.03595	-0.02273	-0.03978	-0.04723	-0.03936	-0.02273	-0.04215	-0.02273	-0.02273	-0.0287	-0.03126	-0.11125	-0.03249	-0.04307	-0.02273	-0.05338	0.79792	-0.03075	-0.18191	1	-0.02273	-0.02273	1	0.73013	-0.02273	0.9783	-0.02273	-0.02273	1	-0.02892	-0.02273	-0.02273	-0.02273	-0.02273	-0.0357	-0.02273	-0.02273	-0.03194	-0.02849	-0.09937	-0.02273	-0.03209
OT25	-0.10927	0.56417	-0.05039	-0.11168	-0.03623	-0.05877	-0.0432	-0.08268	-0.03623	-0.06341	-0.07528	-0.06274	-0.03623	-0.06718	-0.03623	-0.03623	0.90685	-0.04982	0.09398	-0.05179	0.87165	-0.03623	-0.08509	0.26571	-0.04901	-0.06329	0.3631	-0.03623	-0.03623	0.3631	0.86285	-0.03623	0.54824	-0.03623	-0.03623	0.3631	0.0578	-0.03623	-0.03623	-0.03623	0.29209	-0.0569	-0.03623	-0.03623	-0.05092	-0.04542	-0.15839	-0.03623	-0.05115
[truncated: 181 more columns]
